# Supplementary material for: Schizophrenia interactome with 504 novel protein–protein interactions
Source: PubMed Central journal article supplement (PMC4898894; doi:10.1038/npjschz.2016.12), 2016-04-27
Supplement: npjschz201612-s2.pdf [file npjschz201612-s2.pdf]

# GWAS

| Symbol        | Entrez ID | sources | Known PPIs | Novel PPIs |
|---------------|-----------|---------|------------|------------|
| CACNA1I       | 8911      | Nature  | 0          | 11         |
| CNNM2         | 54805     | Nature  | 0          | 6          |
| APOPT1        | 84334     | Nature  | 0          | 5          |
| CENPM         | 79019     | Nature  | 0          | 5          |
| MIR137HG      | 400765    | Nature  | 0          | 5          |
| PLCH2         | 9651      | Nature  | 0          | 4          |
| GID4          | 79018     | Nature  | 0          | 3          |
| SDCCAG8       | 10806     | Nature  | 0          | 3          |
| ZNF536        | 9745      | Nature  | 0          | 3          |
| C10orf32      | 119032    | Nature  | 0          | 2          |
| C11orf31      | 280636    | Nature  | 0          | 2          |
| IGSF9B        | 22997     | Nature  | 0          | 2          |
| TSNARE1       | 203062    | Nature  | 0          | 2          |
| TYW5          | 129450    | Nature  | 0          | 2          |
| CSMD1         | 64478     | Nature  | 0          | 1          |
| LOC642484     | 642484    | Nature  | 0          | 1          |
| SOX2-OT       | 347689    | Nature  | 0          | 1          |
| C10orf32-ASMT | 100528007 | Nature  | 0          | 0          |
| C3orf49       | 132200    | Nature  | 0          | 0          |
| EP300-AS1     | 101927279 | Nature  | 0          | 0          |
| GRAMD1B       | 57476     | Nature  | 0          | 0          |
| LINC01470     | 101927134 | Nature  | 0          | 0          |
| LOC100507431  | 100507431 | Nature  | 0          | 0          |
| TMX2-CTNND1   | 100528016 | Nature  | 0          | 0          |
| CHRNA5        | 1138      | Nature  | 1          | 5          |
| CYP26B1       | 56603     | Nature  | 1          | 4          |
| DGKI          | 9162      | Nature  | 1          | 2          |
| MAN2A1        | 4124      | Nature  | 1          | 2          |
| TMTC1         | 83857     | Nature  | 1          | 2          |
| IMMP2L        | 83943     | Nature  | 1          | 1          |
| DPYD          | 1806      | Nature  | 2          | 8          |
| ZNF804A       | 91752     | Nature  | 2          | 8          |
| CACNB2        | 783       | Nature  | 2          | 7          |
| PRRG2         | 5639      | Nature  | 2          | 7          |
| CNTN4         | 152330    | Nature  | 2          | 5          |
| NLGN4X        | 57502     | Nature  | 2          | 5          |
| CHRNA3        | 1136      | Nature  | 2          | 4          |
| GALNT10       | 55568     | Nature  | 2          | 4          |
| GPM6A         | 2823      | Nature  | 2          | 4          |
| EPC2          | 26122     | Nature  | 2          | 3          |
| HCN1          | 348980    | Nature  | 2          | 3          |
| SMG6          | 23293     | Nature  | 3          | 8          |
| PTGIS         | 5740      | Nature  | 3          | 7          |
| MPHOSPH9      | 10198     | Nature  | 4          | 15         |





# Historical

| Symbol | Entrez Id | Source             | Known PPIs | New PPIs |
|--------|-----------|--------------------|------------|----------|
| SCZD10 | 63944     | OMIM               | 0          | 10       |
| CHI3L1 | 1116      | OMIM               | 0          | 9        |
| SCZD6  | 8400      | OMIM               | 0          | 9        |
| SCZD1  | 6377      | OMIM               | 0          | 8        |
| SCZD7  | 8401      | OMIM               | 0          | 8        |
| PRODH  | 5625      | Historical, OMIM   | 0          | 7        |
| SCZD3  | 6365      | OMIM               | 0          | 7        |
| ZDHH8  | 29801     | Historical         | 0          | 5        |
| SCZD2  | 6378      | OMIM               | 0          | 5        |
| SCZD12 | 619488    | OMIM               | 0          | 3        |
| SCZD14 | 100196913 | OMIM               | 0          | 2        |
| SCZD8  | 8806      | OMIM               | 0          | 2        |
| TAAR6  | 319100    | OMIM               | 0          | 1        |
| DISC2  | 27184     | OMIM               | 0          | 0        |
| SCZD11 | 404686    | OMIM               | 0          | 0        |
| SCZD13 | 100329170 | OMIM               | 0          | 0        |
| MTHFR  | 4524      | Historical, OMIM   | 1          | 7        |
| APOL2  | 23780     | OMIM               | 1          | 4        |
| APOL4  | 80832     | OMIM               | 1          | 3        |
| DAOA   | 267012    | Historical, OMIM   | 1          | 2        |
| KCNN3  | 3782      | Historical         | 2          | 5        |
| VIPR2  | 7434      | OMIM               | 4          | 6        |
| CHRNA7 | 1139      | Historical, OMIM   | 4          | 2        |
| SLC6A4 | 6532      | Historical         | 4          | 1        |
| DAO    | 1610      | Historical, OMIM   | 5          | 5        |
| RTN4R  | 65078     | OMIM               | 6          | 11       |
| GRM3   | 2913      | Historical, Nature | 6          | 9        |
| SLC1A1 | 6505      | OMIM               | 6          | 8        |
| DRD4   | 1815      | Historical         | 6          | 4        |
| SYN2   | 6854      | OMIM               | 6          | 4        |
| NRG1   | 3084      | Historical, OMIM   | 8          | 8        |
| SLC6A3 | 6531      | Historical         | 8          | 2        |
| COMT   | 1312      | Historical, OMIM   | 10         | 5        |
| PPP3CC | 5533      | Historical         | 11         | 5        |
| NOTCH4 | 4855      | Historical         | 13         | 9        |
| RGS4   | 5999      | Historical         | 13         | 8        |
| BDNF   | 627       | Historical         | 14         | 7        |
| DRD3   | 1814      | Historical, OMIM   | 15         | 3        |
| SHANK3 | 85358     | OMIM               | 15         | 3        |
| HTR2A  | 3356      | Historical, OMIM   | 16         | 6        |
| DRD2   | 1813      | Historical         | 21         | 13       |
| TNF    | 7124      | Historical         | 21         | 8        |
| NRXN1  | 9378      | OMIM               | 28         | 9        |
| DTNBP1 | 84062     | Historical, OMIM   | 53         | 8        |

|       |       |                  |     |   |
|-------|-------|------------------|-----|---|
| APOE  | 348   | Historical       | 54  | 7 |
| DISC1 | 27185 | Historical, OMIM | 113 | 6 |
| AKT1  | 207   | Historical, OMIM | 193 | 5 |

# GWAS Interactome Genes

| <b>Gene</b>   | <b>Label</b>   |
|---------------|----------------|
| ADAMTSL3      | Candidate gene |
| AKT3          | Candidate gene |
| AMBRA1        | Candidate gene |
| APOPT1        | Candidate gene |
| ATP2A2        | Candidate gene |
| BCL11B        | Candidate gene |
| C10orf32      | Candidate gene |
| C10orf32-ASMT | Candidate gene |
| C11orf31      | Candidate gene |
| C3orf49       | Candidate gene |
| CACNA1C       | Candidate gene |
| CACNA1I       | Candidate gene |
| CACNB2        | Candidate gene |
| CENPM         | Candidate gene |
| CHRNA3        | Candidate gene |
| CHRNA5        | Candidate gene |
| CLCN3         | Candidate gene |
| CNNM2         | Candidate gene |
| CNTN4         | Candidate gene |
| CSMD1         | Candidate gene |
| CUL3          | Candidate gene |
| CYP26B1       | Candidate gene |
| DGKI          | Candidate gene |
| DPYD          | Candidate gene |
| EP300-AS1     | Candidate gene |
| EPC2          | Candidate gene |
| ETF1          | Candidate gene |
| FES           | Candidate gene |
| FLJ45743      | Candidate gene |
| GALNT10       | Candidate gene |
| GID4          | Candidate gene |
| GIGYF2        | Candidate gene |
| GPM6A         | Candidate gene |
| GRAMD1B       | Candidate gene |
| GRIN2A        | Candidate gene |
| GRM3          | Candidate gene |
| HCN1          | Candidate gene |
| IGSF9B        | Candidate gene |
| IMMP2L        | Candidate gene |
| KDM3B         | Candidate gene |
| LINC0147      | Candidate gene |
| LOC100507431  | Candidate gene |
| MAD1L1        | Candidate gene |
| MAN2A1        | Candidate gene |

|             |                  |
|-------------|------------------|
| MIR137HG    | Candidate gene   |
| MPHOSPH9    | Candidate gene   |
| MPP6        | Candidate gene   |
| NAB2        | Candidate gene   |
| NFATC3      | Candidate gene   |
| NLGN4X      | Candidate gene   |
| NRGN        | Candidate gene   |
| OTUD7B      | Candidate gene   |
| PAK6        | Candidate gene   |
| PLCH2       | Candidate gene   |
| PPP1R16B    | Candidate gene   |
| PRKD1       | Candidate gene   |
| PRRG2       | Candidate gene   |
| PTGIS       | Candidate gene   |
| RERE        | Candidate gene   |
| RGS6        | Candidate gene   |
| SATB2       | Candidate gene   |
| SDCCAG8     | Candidate gene   |
| SHMT2       | Candidate gene   |
| SMG6        | Candidate gene   |
| SNAP91      | Candidate gene   |
| SOX2-OT     | Candidate gene   |
| SRPK2       | Candidate gene   |
| STAG1       | Candidate gene   |
| TCF20       | Candidate gene   |
| TCF4        | Candidate gene   |
| TMTC1       | Candidate gene   |
| TMX2-CTNND1 | Candidate gene   |
| TSNARE1     | Candidate gene   |
| TYW5        | Candidate gene   |
| VRK2        | Candidate gene   |
| ZNF536      | Candidate gene   |
| ZNF804A     | Candidate gene   |
| AATF        | Known Interactor |
| ABCA1       | Known Interactor |
| ABL1        | Known Interactor |
| ABTB1       | Known Interactor |
| ABTB2       | Known Interactor |
| ACIN1       | Known Interactor |
| ACTN1       | Known Interactor |
| ADAP1       | Known Interactor |
| ADPRH       | Known Interactor |
| AES         | Known Interactor |
| AHCYL1      | Known Interactor |
| AKAP13      | Known Interactor |
| AKT1        | Known Interactor |
| ALG13       | Known Interactor |

|          |                  |
|----------|------------------|
| ALKBH3   | Known Interactor |
| ALOX5    | Known Interactor |
| AMMECR1L | Known Interactor |
| AMOTL2   | Known Interactor |
| AP1M1    | Known Interactor |
| AP2A2    | Known Interactor |
| AP2B1    | Known Interactor |
| AP4M1    | Known Interactor |
| APC      | Known Interactor |
| APEX1    | Known Interactor |
| APOBEC3C | Known Interactor |
| APP      | Known Interactor |
| AQP1     | Known Interactor |
| AR       | Known Interactor |
| ARGLU1   | Known Interactor |
| ARHGAP12 | Known Interactor |
| ARHGAP18 | Known Interactor |
| ARHGAP32 | Known Interactor |
| ARHGEF1  | Known Interactor |
| ARHGEF12 | Known Interactor |
| ARL6IP1  | Known Interactor |
| ARL6IP4  | Known Interactor |
| ARMC7    | Known Interactor |
| ARPC1B   | Known Interactor |
| ASCL1    | Known Interactor |
| ASCL3    | Known Interactor |
| ASCL4    | Known Interactor |
| ASPSCR1  | Known Interactor |
| ATAT1    | Known Interactor |
| ATN1     | Known Interactor |
| ATP6V1B2 | Known Interactor |
| ATXN1    | Known Interactor |
| AURKA    | Known Interactor |
| BAG5     | Known Interactor |
| BAIAP2   | Known Interactor |
| BARD1    | Known Interactor |
| BCAR1    | Known Interactor |
| BCAS2    | Known Interactor |
| BCL2     | Known Interactor |
| BCL2L2   | Known Interactor |
| BCR      | Known Interactor |
| BECN1    | Known Interactor |
| BRCA1    | Known Interactor |
| BRD3     | Known Interactor |
| BTBD10   | Known Interactor |
| BTK      | Known Interactor |
| BZRAP1   | Known Interactor |



|          |                  |
|----------|------------------|
| C16orf78 | Known Interactor |
| C17orf85 | Known Interactor |
| C18orf25 | Known Interactor |
| C19orf66 | Known Interactor |
| C1QBP    | Known Interactor |
| C1orf109 | Known Interactor |
| C1orf35  | Known Interactor |
| C4orf46  | Known Interactor |
| C9orf171 | Known Interactor |
| CABP1    | Known Interactor |
| CABP5    | Known Interactor |
| CACNB3   | Known Interactor |
| CACNG2   | Known Interactor |
| CALM1    | Known Interactor |
| CALM2    | Known Interactor |
| CALM3    | Known Interactor |
| CAMK1D   | Known Interactor |
| CAMK2A   | Known Interactor |
| CAMK2B   | Known Interactor |
| CAND1    | Known Interactor |
| CASK     | Known Interactor |
| CBFA2T2  | Known Interactor |
| CBLN4    | Known Interactor |
| CBX5     | Known Interactor |
| CCDC101  | Known Interactor |
| CCDC28A  | Known Interactor |
| CCDC33   | Known Interactor |
| CCDC94   | Known Interactor |
| CCDC97   | Known Interactor |
| CCHCR1   | Known Interactor |
| CCM2     | Known Interactor |
| CCND1    | Known Interactor |
| CCNE1    | Known Interactor |
| CCT2     | Known Interactor |
| CCT4     | Known Interactor |
| CDC25A   | Known Interactor |
| CDC34    | Known Interactor |
| CDC42    | Known Interactor |
| CDC42EP4 | Known Interactor |
| CDC73    | Known Interactor |
| CDCA7L   | Known Interactor |
| CDK1     | Known Interactor |
| CDK5     | Known Interactor |
| CDK6     | Known Interactor |
| CDK7     | Known Interactor |
| CDKN1A   | Known Interactor |
| CDKN2C   | Known Interactor |

|         |                  |
|---------|------------------|
| CEP55   | Known Interactor |
| CEP70   | Known Interactor |
| CFTR    | Known Interactor |
| CHAF1A  | Known Interactor |
| CHCHD2  | Known Interactor |
| CHD2    | Known Interactor |
| CHERP   | Known Interactor |
| CHIC2   | Known Interactor |
| CHRNB4  | Known Interactor |
| CHTOP   | Known Interactor |
| CHUK    | Known Interactor |
| CKS1B   | Known Interactor |
| CLDN19  | Known Interactor |
| CLK1    | Known Interactor |
| CLK2    | Known Interactor |
| CLK3    | Known Interactor |
| CMTM5   | Known Interactor |
| COIL    | Known Interactor |
| COMMD1  | Known Interactor |
| COPS2   | Known Interactor |
| COPS5   | Known Interactor |
| COPS7A  | Known Interactor |
| CREBBP  | Known Interactor |
| CRX     | Known Interactor |
| CSAG1   | Known Interactor |
| CSF2RB  | Known Interactor |
| CSNK1A1 | Known Interactor |
| CSNK2B  | Known Interactor |
| CTBP1   | Known Interactor |
| CTNNB1  | Known Interactor |
| CTNNBL1 | Known Interactor |
| CWF19L2 | Known Interactor |
| DAW1    | Known Interactor |
| DBF4B   | Known Interactor |
| DCUN1D1 | Known Interactor |
| DCUN1D2 | Known Interactor |
| DCUN1D3 | Known Interactor |
| DCUN1D4 | Known Interactor |
| DCUN1D5 | Known Interactor |
| DDX21   | Known Interactor |
| DDX46   | Known Interactor |
| DDX6    | Known Interactor |
| DEF6    | Known Interactor |
| DGCR6   | Known Interactor |
| DHX8    | Known Interactor |
| DIS3    | Known Interactor |
| DLG1    | Known Interactor |

|          |                  |
|----------|------------------|
| DLG2     | Known Interactor |
| DLG3     | Known Interactor |
| DLG4     | Known Interactor |
| DLGAP1   | Known Interactor |
| DLGAP2   | Known Interactor |
| DMAP1    | Known Interactor |
| DMRT3    | Known Interactor |
| DNAJC8   | Known Interactor |
| DNM2     | Known Interactor |
| DNMT1    | Known Interactor |
| DOK1     | Known Interactor |
| DPYSL5   | Known Interactor |
| DRAP1    | Known Interactor |
| DRG1     | Known Interactor |
| DYNLL1   | Known Interactor |
| DYNLRB1  | Known Interactor |
| DYRK4    | Known Interactor |
| ECM1     | Known Interactor |
| EED      | Known Interactor |
| EFEMP1   | Known Interactor |
| EFEMP2   | Known Interactor |
| EFHC1    | Known Interactor |
| EFNB1    | Known Interactor |
| EGFR     | Known Interactor |
| EGLN2    | Known Interactor |
| EGR1     | Known Interactor |
| EGR2     | Known Interactor |
| EHMT2    | Known Interactor |
| EIF1AY   | Known Interactor |
| EIF3G    | Known Interactor |
| EIF4E2   | Known Interactor |
| EIF4EBP1 | Known Interactor |
| EIF5     | Known Interactor |
| ENC1     | Known Interactor |
| ENOX2    | Known Interactor |
| EP300    | Known Interactor |
| EPAS1    | Known Interactor |
| EPB41L1  | Known Interactor |
| EPB41L3  | Known Interactor |
| EPB41L4A | Known Interactor |
| EPHB6    | Known Interactor |
| EPS15    | Known Interactor |
| EPS8L3   | Known Interactor |
| ERCC3    | Known Interactor |
| ERN1     | Known Interactor |
| ESR1     | Known Interactor |
| EVI5L    | Known Interactor |

|           |                  |
|-----------|------------------|
| EXOSC1    | Known Interactor |
| EXOSC10   | Known Interactor |
| EXOSC2    | Known Interactor |
| EXOSC4    | Known Interactor |
| EXOSC5    | Known Interactor |
| EXOSC6    | Known Interactor |
| EXOSC7    | Known Interactor |
| EXOSC8    | Known Interactor |
| EXOSC9    | Known Interactor |
| EZH2      | Known Interactor |
| FAH       | Known Interactor |
| FAM124B   | Known Interactor |
| FAM131C   | Known Interactor |
| FAM208B   | Known Interactor |
| FAM74A4   | Known Interactor |
| FAM76B    | Known Interactor |
| FAM90A1   | Known Interactor |
| FATE1     | Known Interactor |
| FERD3L    | Known Interactor |
| FGF12     | Known Interactor |
| FKBP4     | Known Interactor |
| FKBP5     | Known Interactor |
| FLAD1     | Known Interactor |
| FLNA      | Known Interactor |
| FOLR1     | Known Interactor |
| FOS       | Known Interactor |
| FOXN3     | Known Interactor |
| FRS3      | Known Interactor |
| FTL       | Known Interactor |
| FXR2      | Known Interactor |
| FYN       | Known Interactor |
| GABARAP   | Known Interactor |
| GABARAPL1 | Known Interactor |
| GAN       | Known Interactor |
| GCC1      | Known Interactor |
| GEM       | Known Interactor |
| GLP1R     | Known Interactor |
| GLRX3     | Known Interactor |
| GMCL1     | Known Interactor |
| GNB1      | Known Interactor |
| GNB2L1    | Known Interactor |
| GNB5      | Known Interactor |
| GNG10     | Known Interactor |
| GOLGA2    | Known Interactor |
| GOLGA8EP  | Known Interactor |
| GOLGA8F   | Known Interactor |
| GOPC      | Known Interactor |

|           |                  |
|-----------|------------------|
| GORASP2   | Known Interactor |
| GPR114    | Known Interactor |
| GPS1      | Known Interactor |
| GRASP     | Known Interactor |
| GRB10     | Known Interactor |
| GRIN1     | Known Interactor |
| GRIN3A    | Known Interactor |
| GRIN3B    | Known Interactor |
| GRIP1     | Known Interactor |
| GSK3B     | Known Interactor |
| GSPT1     | Known Interactor |
| GSPT2     | Known Interactor |
| GTF2E1    | Known Interactor |
| GTF3C5    | Known Interactor |
| GUCD1     | Known Interactor |
| HAND2     | Known Interactor |
| HAT1      | Known Interactor |
| HAUS1     | Known Interactor |
| HBP1      | Known Interactor |
| HBS1L     | Known Interactor |
| HCN2      | Known Interactor |
| HDAC1     | Known Interactor |
| HDAC2     | Known Interactor |
| HDAC4     | Known Interactor |
| HDAC5     | Known Interactor |
| HDAC7     | Known Interactor |
| HGS       | Known Interactor |
| HIC1      | Known Interactor |
| HIRIP3    | Known Interactor |
| HIST2H2AC | Known Interactor |
| HIST2H2BE | Known Interactor |
| HIST2H3C  | Known Interactor |
| HIST3H3   | Known Interactor |
| HLA-DMB   | Known Interactor |
| HMGN3     | Known Interactor |
| HNRNPC    | Known Interactor |
| HNRNPD    | Known Interactor |
| HOMER3    | Known Interactor |
| HSF2      | Known Interactor |
| HSH2D     | Known Interactor |
| HSPA4     | Known Interactor |
| HSPB1     | Known Interactor |
| HSPB7     | Known Interactor |
| IBTK      | Known Interactor |
| ID1       | Known Interactor |
| ID2       | Known Interactor |
| ID3       | Known Interactor |

|           |                  |
|-----------|------------------|
| ID4       | Known Interactor |
| IFIT5     | Known Interactor |
| IGF1R     | Known Interactor |
| IKZF3     | Known Interactor |
| IL16      | Known Interactor |
| IL4R      | Known Interactor |
| INADL     | Known Interactor |
| INS       | Known Interactor |
| IRS1      | Known Interactor |
| IRS2      | Known Interactor |
| JAK1      | Known Interactor |
| JAK2      | Known Interactor |
| JAK3      | Known Interactor |
| JAKMIP2   | Known Interactor |
| JUN       | Known Interactor |
| JUP       | Known Interactor |
| KAT6A     | Known Interactor |
| KCNN2     | Known Interactor |
| KCTD13    | Known Interactor |
| KCTD14    | Known Interactor |
| KCTD5     | Known Interactor |
| KCTD6     | Known Interactor |
| KCTD9     | Known Interactor |
| KEAP1     | Known Interactor |
| KHDRBS1   | Known Interactor |
| KIDINS220 | Known Interactor |
| KLC3      | Known Interactor |
| KLHL12    | Known Interactor |
| KLHL2     | Known Interactor |
| KLHL20    | Known Interactor |
| KLHL3     | Known Interactor |
| KLHL32    | Known Interactor |
| KLHL41    | Known Interactor |
| KLHL42    | Known Interactor |
| KLHL5     | Known Interactor |
| KNSTRN    | Known Interactor |
| KRT40     | Known Interactor |
| KRTAP10-3 | Known Interactor |
| KRTAP10-8 | Known Interactor |
| KRTAP2-4  | Known Interactor |
| KRTAP4-12 | Known Interactor |
| LASP1     | Known Interactor |
| LCA5      | Known Interactor |
| LCE3D     | Known Interactor |
| LENG1     | Known Interactor |
| LGALS14   | Known Interactor |
| LGALSL    | Known Interactor |

|          |                  |
|----------|------------------|
| LIG4     | Known Interactor |
| LIN7A    | Known Interactor |
| LMO1     | Known Interactor |
| LMO4     | Known Interactor |
| LNPEP    | Known Interactor |
| LNX1     | Known Interactor |
| LRRN4CL  | Known Interactor |
| LUC7L    | Known Interactor |
| LUC7L2   | Known Interactor |
| LUC7L3   | Known Interactor |
| LUZP4    | Known Interactor |
| LXN      | Known Interactor |
| LYL1     | Known Interactor |
| LZTR1    | Known Interactor |
| MAB21L2  | Known Interactor |
| MAD2L1   | Known Interactor |
| MAD2L2   | Known Interactor |
| MAGEB1   | Known Interactor |
| MAGOHB   | Known Interactor |
| MAP2K7   | Known Interactor |
| MAP3K7   | Known Interactor |
| MAPK14   | Known Interactor |
| MAPK3    | Known Interactor |
| MAPK8    | Known Interactor |
| MAPK8IP1 | Known Interactor |
| MAPK8IP2 | Known Interactor |
| MAPK9    | Known Interactor |
| MAPKAPK5 | Known Interactor |
| MAPKBP1  | Known Interactor |
| 10-Mar   | Known Interactor |
| MATN3    | Known Interactor |
| MAX      | Known Interactor |
| MBD3     | Known Interactor |
| MCM7     | Known Interactor |
| MCOLN3   | Known Interactor |
| MDFI     | Known Interactor |
| MDK      | Known Interactor |
| MDM2     | Known Interactor |
| MEMO1    | Known Interactor |
| MEN1     | Known Interactor |
| MFAP1    | Known Interactor |
| MLLT6    | Known Interactor |
| MLX      | Known Interactor |
| MORF4L1  | Known Interactor |
| MORN4    | Known Interactor |
| MPP3     | Known Interactor |
| MRFAP1L1 | Known Interactor |

|          |                  |
|----------|------------------|
| MRPL10   | Known Interactor |
| MRPS6    | Known Interactor |
| MSC      | Known Interactor |
| MSRB3    | Known Interactor |
| MT2A     | Known Interactor |
| MT2P1    | Known Interactor |
| MTA2     | Known Interactor |
| MTOR     | Known Interactor |
| MUC1     | Known Interactor |
| MUC7     | Known Interactor |
| MVP      | Known Interactor |
| MYO5B    | Known Interactor |
| MYOD1    | Known Interactor |
| NCK2     | Known Interactor |
| NDC80    | Known Interactor |
| NDN      | Known Interactor |
| NDOR1    | Known Interactor |
| NDRG1    | Known Interactor |
| NEBL     | Known Interactor |
| NECAP1   | Known Interactor |
| NEDD4    | Known Interactor |
| NEDD4L   | Known Interactor |
| NEDD8    | Known Interactor |
| NEDD9    | Known Interactor |
| NEFL     | Known Interactor |
| NEK2     | Known Interactor |
| NEK6     | Known Interactor |
| NEK8     | Known Interactor |
| NELFE    | Known Interactor |
| NEU4     | Known Interactor |
| NEUROD1  | Known Interactor |
| NEUROG1  | Known Interactor |
| NFKB1    | Known Interactor |
| NGLY1    | Known Interactor |
| NINL     | Known Interactor |
| NME7     | Known Interactor |
| NMUR2    | Known Interactor |
| NOL9     | Known Interactor |
| NONO     | Known Interactor |
| NOP16    | Known Interactor |
| NOTCH2NL | Known Interactor |
| NPM2     | Known Interactor |
| NR2C2AP  | Known Interactor |
| NR2E1    | Known Interactor |
| NR2F1    | Known Interactor |
| NR2F2    | Known Interactor |
| NR4A1    | Known Interactor |



|          |                  |
|----------|------------------|
| NSMCE4A  | Known Interactor |
| NSRP1    | Known Interactor |
| NUDT10   | Known Interactor |
| NUP50    | Known Interactor |
| NXT2     | Known Interactor |
| OCEL1    | Known Interactor |
| OGT      | Known Interactor |
| OLIG2    | Known Interactor |
| ORC4     | Known Interactor |
| OSGIN1   | Known Interactor |
| OTUD4    | Known Interactor |
| PABPC4   | Known Interactor |
| PAK4     | Known Interactor |
| PAM16    | Known Interactor |
| PARK2    | Known Interactor |
| PARN     | Known Interactor |
| PARP1    | Known Interactor |
| PATE1    | Known Interactor |
| PBLD     | Known Interactor |
| PCBD1    | Known Interactor |
| PDE4DIP  | Known Interactor |
| PDE7B    | Known Interactor |
| PDIA2    | Known Interactor |
| PDPK1    | Known Interactor |
| PDZK1    | Known Interactor |
| PELI1    | Known Interactor |
| PHC2     | Known Interactor |
| PHF1     | Known Interactor |
| PHOSPHO2 | Known Interactor |
| PIAS1    | Known Interactor |
| PICK1    | Known Interactor |
| PIK3R1   | Known Interactor |
| PIN1     | Known Interactor |
| PLCG1    | Known Interactor |
| PLCG2    | Known Interactor |
| PLEKHN1  | Known Interactor |
| PLN      | Known Interactor |
| PLSCR1   | Known Interactor |
| PLXNA1   | Known Interactor |
| POLB     | Known Interactor |
| POLR1A   | Known Interactor |
| POLR1C   | Known Interactor |
| POT1     | Known Interactor |
| PPARD    | Known Interactor |
| PPIA     | Known Interactor |
| PPID     | Known Interactor |
| PPIL1    | Known Interactor |

|          |                  |
|----------|------------------|
| PPM1A    | Known Interactor |
| PPP1CC   | Known Interactor |
| PPP1R14A | Known Interactor |
| PPP1R18  | Known Interactor |
| PPP2CA   | Known Interactor |
| PRKAA1   | Known Interactor |
| PRKAA2   | Known Interactor |
| PRKAB2   | Known Interactor |
| PRKACA   | Known Interactor |
| PRKCA    | Known Interactor |
| PRKCB    | Known Interactor |
| PRKCD    | Known Interactor |
| PRKCE    | Known Interactor |
| PRKCG    | Known Interactor |
| PRKCH    | Known Interactor |
| PRKCZ    | Known Interactor |
| PRPF38A  | Known Interactor |
| PRPF40A  | Known Interactor |
| PRRC2A   | Known Interactor |
| PRRC2B   | Known Interactor |
| PSEN1    | Known Interactor |
| PSMA1    | Known Interactor |
| PSMA3    | Known Interactor |
| PSMG2    | Known Interactor |
| PTBP1    | Known Interactor |
| PTF1A    | Known Interactor |
| PTGER3   | Known Interactor |
| PTGES3   | Known Interactor |
| PTGS1    | Known Interactor |
| PTGS2    | Known Interactor |
| PTK2B    | Known Interactor |
| PTPN4    | Known Interactor |
| RAB3IL1  | Known Interactor |
| RAB41    | Known Interactor |
| RABIF    | Known Interactor |
| RAD21    | Known Interactor |
| RASA1    | Known Interactor |
| RASA3    | Known Interactor |
| RBBP4    | Known Interactor |
| RBBP7    | Known Interactor |
| RBFOX2   | Known Interactor |
| RBM12    | Known Interactor |
| RBM15    | Known Interactor |
| RBM23    | Known Interactor |
| RBM39    | Known Interactor |
| RBM8A    | Known Interactor |
| RBPMS    | Known Interactor |

|          |                  |
|----------|------------------|
| RBX1     | Known Interactor |
| RCBTB1   | Known Interactor |
| RCBTB2   | Known Interactor |
| RECK     | Known Interactor |
| RELA     | Known Interactor |
| REM1     | Known Interactor |
| REXO1L6P | Known Interactor |
| RFC5     | Known Interactor |
| RGS3     | Known Interactor |
| RHOBTB3  | Known Interactor |
| RHOJ     | Known Interactor |
| RIMS1    | Known Interactor |
| RIT1     | Known Interactor |
| RIT2     | Known Interactor |
| RNF138   | Known Interactor |
| RNF2     | Known Interactor |
| RNF4     | Known Interactor |
| RNF7     | Known Interactor |
| RNF8     | Known Interactor |
| RNPS1    | Known Interactor |
| RPL22    | Known Interactor |
| RPL39L   | Known Interactor |
| RPL41    | Known Interactor |
| RPS20    | Known Interactor |
| RQCD1    | Known Interactor |
| RSPH14   | Known Interactor |
| RSRC1    | Known Interactor |
| RSRC2    | Known Interactor |
| RSRP1    | Known Interactor |
| RTF1     | Known Interactor |
| RUNX1T1  | Known Interactor |
| RWDD2B   | Known Interactor |
| RYR2     | Known Interactor |
| S100A1   | Known Interactor |
| SCNM1    | Known Interactor |
| SCOC     | Known Interactor |
| SDCBP    | Known Interactor |
| SDR42E1  | Known Interactor |
| SEC14L4  | Known Interactor |
| SEC23B   | Known Interactor |
| SEMA3B   | Known Interactor |
| SF3B4    | Known Interactor |
| SHKBP1   | Known Interactor |
| SIGLEC6  | Known Interactor |
| SIN3A    | Known Interactor |
| SIN3B    | Known Interactor |
| SKIV2L2  | Known Interactor |

|          |                  |
|----------|------------------|
| SLAIN2   | Known Interactor |
| SLC39A13 | Known Interactor |
| SLC4A1AP | Known Interactor |
| SLC9A3R1 | Known Interactor |
| SMAD1    | Known Interactor |
| SMAD2    | Known Interactor |
| SMAD9    | Known Interactor |
| SMARCA4  | Known Interactor |
| SMCP     | Known Interactor |
| SMG5     | Known Interactor |
| SMOC1    | Known Interactor |
| SNIP1    | Known Interactor |
| SNRNP27  | Known Interactor |
| SNRNP35  | Known Interactor |
| SNRNP70  | Known Interactor |
| SNRPB    | Known Interactor |
| SNURF    | Known Interactor |
| SNX2     | Known Interactor |
| SNX9     | Known Interactor |
| SP1      | Known Interactor |
| SPAG8    | Known Interactor |
| SPATA2   | Known Interactor |
| SPATC1L  | Known Interactor |
| SPG21    | Known Interactor |
| SPP1     | Known Interactor |
| SPTAN1   | Known Interactor |
| SRC      | Known Interactor |
| SREK1    | Known Interactor |
| SRI      | Known Interactor |
| SRRM1    | Known Interactor |
| SRSF1    | Known Interactor |
| SRSF12   | Known Interactor |
| SRSF2    | Known Interactor |
| SRSF3    | Known Interactor |
| SRSF5    | Known Interactor |
| SRSF7    | Known Interactor |
| SRSF8    | Known Interactor |
| SRSF9    | Known Interactor |
| STAG2    | Known Interactor |
| STAMBPL1 | Known Interactor |
| STAT3    | Known Interactor |
| STK16    | Known Interactor |
| STMN2    | Known Interactor |
| STON1    | Known Interactor |
| STX11    | Known Interactor |
| SUMO1    | Known Interactor |
| SUMO1P1  | Known Interactor |

|           |                  |
|-----------|------------------|
| SUMO2     | Known Interactor |
| SUMO3     | Known Interactor |
| SUPT16H   | Known Interactor |
| SUV39H1   | Known Interactor |
| SVIL      | Known Interactor |
| SYK       | Known Interactor |
| SZT2      | Known Interactor |
| TADA2A    | Known Interactor |
| TAF7L     | Known Interactor |
| TAL1      | Known Interactor |
| TAL2      | Known Interactor |
| TAPBPL    | Known Interactor |
| TCEA2     | Known Interactor |
| TCEANC    | Known Interactor |
| TCEB1     | Known Interactor |
| TCF3      | Known Interactor |
| TCHP      | Known Interactor |
| TCL1A     | Known Interactor |
| TCOF1     | Known Interactor |
| TCP1      | Known Interactor |
| TDP2      | Known Interactor |
| TERF1     | Known Interactor |
| TERT      | Known Interactor |
| TEX11     | Known Interactor |
| TGIF2LY   | Known Interactor |
| THOP1     | Known Interactor |
| TLE1      | Known Interactor |
| TLE4      | Known Interactor |
| TMEM213   | Known Interactor |
| TNFAIP1   | Known Interactor |
| TNFRSF10C | Known Interactor |
| TNIP2     | Known Interactor |
| TP53      | Known Interactor |
| TPD52     | Known Interactor |
| TPD52L1   | Known Interactor |
| TPM1      | Known Interactor |
| TPM3      | Known Interactor |
| TPR       | Known Interactor |
| TRA2A     | Known Interactor |
| TRA2B     | Known Interactor |
| TRAF3IP1  | Known Interactor |
| TRAF6     | Known Interactor |
| TRAPPC2L  | Known Interactor |
| TRIM22    | Known Interactor |
| TRIM28    | Known Interactor |
| TRIM29    | Known Interactor |
| TRIM41    | Known Interactor |

|         |                  |
|---------|------------------|
| TRIP6   | Known Interactor |
| TSC2    | Known Interactor |
| TSC22D3 | Known Interactor |
| TSHZ3   | Known Interactor |
| TSSC4   | Known Interactor |
| TSSK3   | Known Interactor |
| TTC19   | Known Interactor |
| TTF1    | Known Interactor |
| TTN     | Known Interactor |
| TUBA1B  | Known Interactor |
| TUBGCP4 | Known Interactor |
| TWIST1  | Known Interactor |
| TWIST2  | Known Interactor |
| TXNL4B  | Known Interactor |
| U2AF1   | Known Interactor |
| U2AF2   | Known Interactor |
| UBC     | Known Interactor |
| UBD     | Known Interactor |
| UBE2D1  | Known Interactor |
| UBE2D2  | Known Interactor |
| UBE2D3  | Known Interactor |
| UBE2E1  | Known Interactor |
| UBE2E2  | Known Interactor |
| UBE2E3  | Known Interactor |
| UBE2M   | Known Interactor |
| UBE2S   | Known Interactor |
| UBQLN1  | Known Interactor |
| UBTF    | Known Interactor |
| USP15   | Known Interactor |
| USP4    | Known Interactor |
| UTP23   | Known Interactor |
| VAV2    | Known Interactor |
| VHL     | Known Interactor |
| VIMP    | Known Interactor |
| VPS28   | Known Interactor |
| VRK1    | Known Interactor |
| WBP11   | Known Interactor |
| WDR5    | Known Interactor |
| WFDC5   | Known Interactor |
| WNT7B   | Known Interactor |
| XRCC5   | Known Interactor |
| XRCC6   | Known Interactor |
| YPEL2   | Known Interactor |
| YPEL3   | Known Interactor |
| YTHDC1  | Known Interactor |
| YWHAB   | Known Interactor |
| YWHAG   | Known Interactor |

|            |                  |
|------------|------------------|
| YWHAQ      | Known Interactor |
| YWHAZ      | Known Interactor |
| ZBED8      | Known Interactor |
| ZDHHC17    | Known Interactor |
| ZDHHC24    | Known Interactor |
| ZMAT4      | Known Interactor |
| ZMYND19    | Known Interactor |
| ZMYND8     | Known Interactor |
| ZNF124     | Known Interactor |
| ZNF205-AS1 | Known Interactor |
| ZNF417     | Known Interactor |
| ZNF512B    | Known Interactor |
| ZNF587     | Known Interactor |
| ZNF746     | Known Interactor |
| ZNF775     | Known Interactor |
| ZRANB2     | Known Interactor |
| ZRSR2      | Known Interactor |
| ZSCAN32    | Known Interactor |
| ZSCAN9     | Known Interactor |
| ABI2       | Novel Interactor |
| ACACA      | Novel Interactor |
| ACOT8      | Novel Interactor |
| ACTR1A     | Novel Interactor |
| ACVR1B     | Novel Interactor |
| ADAM23     | Novel Interactor |
| ADAMTS8    | Novel Interactor |
| AGFG1      | Novel Interactor |
| AHNAK2     | Novel Interactor |
| AIMP2      | Novel Interactor |
| ALDH1B1    | Novel Interactor |
| ALDH6A1    | Novel Interactor |
| ALG14      | Novel Interactor |
| ALPK3      | Novel Interactor |
| ALPP       | Novel Interactor |
| ALX4       | Novel Interactor |
| ANXA10     | Novel Interactor |
| ANXA11     | Novel Interactor |
| ANXA2R     | Novel Interactor |
| ANXA5      | Novel Interactor |
| APH1B      | Novel Interactor |
| APOA5      | Novel Interactor |
| APOBEC1    | Novel Interactor |
| APOL1      | Novel Interactor |
| AREL1      | Novel Interactor |
| ARF5       | Novel Interactor |
| ARFGEF2    | Novel Interactor |
| ARL4C      | Novel Interactor |

|           |                  |
|-----------|------------------|
| ARPC3     | Novel Interactor |
| AS3MT     | Novel Interactor |
| ASB3      | Novel Interactor |
| ASIC2     | Novel Interactor |
| ASPH      | Novel Interactor |
| ATG16L1   | Novel Interactor |
| ATP6VOA2  | Novel Interactor |
| BEGAIN    | Novel Interactor |
| BET1      | Novel Interactor |
| BLM       | Novel Interactor |
| BNC1      | Novel Interactor |
| BRE       | Novel Interactor |
| BTF3      | Novel Interactor |
| BYSL      | Novel Interactor |
| C10orf67  | Novel Interactor |
| C10orf76  | Novel Interactor |
| C10orf95  | Novel Interactor |
| C14orf132 | Novel Interactor |
| C15orf41  | Novel Interactor |
| C19orf12  | Novel Interactor |
| C1orf54   | Novel Interactor |
| C22orf46  | Novel Interactor |
| C4orf27   | Novel Interactor |
| C5orf34   | Novel Interactor |
| CA3       | Novel Interactor |
| CAB39     | Novel Interactor |
| CACNA1H   | Novel Interactor |
| CALB2     | Novel Interactor |
| CAMTA1    | Novel Interactor |
| CARHSP1   | Novel Interactor |
| CASC5     | Novel Interactor |
| CASP3     | Novel Interactor |
| CASR      | Novel Interactor |
| CCDC134   | Novel Interactor |
| CCDC91    | Novel Interactor |
| CCL16     | Novel Interactor |
| CCL22     | Novel Interactor |
| CCL4      | Novel Interactor |
| CCND2     | Novel Interactor |
| CCNT2     | Novel Interactor |
| CD9       | Novel Interactor |
| CDC42SE1  | Novel Interactor |
| CDK2AP1   | Novel Interactor |
| CDK5RAP1  | Novel Interactor |
| CDKL3     | Novel Interactor |
| CDON      | Novel Interactor |
| CEBPG     | Novel Interactor |



|              |                  |
|--------------|------------------|
| CELSR2       | Novel Interactor |
| CEP104       | Novel Interactor |
| CEP170       | Novel Interactor |
| CEP44        | Novel Interactor |
| CEP63        | Novel Interactor |
| CHCHD3       | Novel Interactor |
| CHST12       | Novel Interactor |
| CLDN18       | Novel Interactor |
| CLUH         | Novel Interactor |
| CNTN5        | Novel Interactor |
| CNTN6        | Novel Interactor |
| COMMD6       | Novel Interactor |
| CPB2         | Novel Interactor |
| CRABP1       | Novel Interactor |
| CREM         | Novel Interactor |
| CSDE1        | Novel Interactor |
| CSF2         | Novel Interactor |
| CTIF         | Novel Interactor |
| CTTNBP2      | Novel Interactor |
| CXADR        | Novel Interactor |
| CYP51A1      | Novel Interactor |
| CYTH2        | Novel Interactor |
| DECR1        | Novel Interactor |
| DES1         | Novel Interactor |
| DGKH         | Novel Interactor |
| DHDDS        | Novel Interactor |
| DLL4         | Novel Interactor |
| DNAJC10      | Novel Interactor |
| DNAL4        | Novel Interactor |
| DPCD         | Novel Interactor |
| DUSP19       | Novel Interactor |
| DYNAP        | Novel Interactor |
| EFTUD1       | Novel Interactor |
| EI24         | Novel Interactor |
| ELAC2        | Novel Interactor |
| EML1         | Novel Interactor |
| EPB41L4A-AS1 | Novel Interactor |
| EPHA2        | Novel Interactor |
| ERAP2        | Novel Interactor |
| ETFA         | Novel Interactor |
| ETFDH        | Novel Interactor |
| FAM103A1     | Novel Interactor |
| FAM106A      | Novel Interactor |
| FAM13B       | Novel Interactor |
| FAM171B      | Novel Interactor |
| FAM53C       | Novel Interactor |
| FAM63A       | Novel Interactor |

|           |                  |
|-----------|------------------|
| FAM83D    | Novel Interactor |
| FAP       | Novel Interactor |
| FBLN1     | Novel Interactor |
| FBXL15    | Novel Interactor |
| FBXO42    | Novel Interactor |
| FBXO8     | Novel Interactor |
| FGL2      | Novel Interactor |
| FSCN1     | Novel Interactor |
| FURIN     | Novel Interactor |
| FZD3      | Novel Interactor |
| GABARAPL2 | Novel Interactor |
| GEMIN5    | Novel Interactor |
| GHRL      | Novel Interactor |
| GJD2      | Novel Interactor |
| GMFG      | Novel Interactor |
| GNAS      | Novel Interactor |
| GOLGA2P10 | Novel Interactor |
| GPR123    | Novel Interactor |
| GPR137B   | Novel Interactor |
| GPR85     | Novel Interactor |
| GPR88     | Novel Interactor |
| GPRC5C    | Novel Interactor |
| GRIA2     | Novel Interactor |
| GSK3A     | Novel Interactor |
| GTF2H2    | Novel Interactor |
| GTPBP1    | Novel Interactor |
| GUK1      | Novel Interactor |
| GYPA      | Novel Interactor |
| HCAR3     | Novel Interactor |
| HDGFRP3   | Novel Interactor |
| HMGXB4    | Novel Interactor |
| HOXA10    | Novel Interactor |
| HPCA      | Novel Interactor |
| HRH1      | Novel Interactor |
| HS3ST1    | Novel Interactor |
| HSD17B12  | Novel Interactor |
| IDH3A     | Novel Interactor |
| IGHV5-78  | Novel Interactor |
| INF2      | Novel Interactor |
| INPP5K    | Novel Interactor |
| JOSD1     | Novel Interactor |
| KBTBD4    | Novel Interactor |
| KCNJ3     | Novel Interactor |
| KCNJ4     | Novel Interactor |
| KIAA1715  | Novel Interactor |
| KMT2D     | Novel Interactor |
| KNTC1     | Novel Interactor |

|           |                  |
|-----------|------------------|
| KXD1      | Novel Interactor |
| LAMP3     | Novel Interactor |
| LCP1      | Novel Interactor |
| LCP2      | Novel Interactor |
| LIPG      | Novel Interactor |
| LOC153684 | Novel Interactor |
| LPPR5     | Novel Interactor |
| LRP1      | Novel Interactor |
| LRP2BP    | Novel Interactor |
| LRRC48    | Novel Interactor |
| LTB4R2    | Novel Interactor |
| MAN2A2    | Novel Interactor |
| MARS2     | Novel Interactor |
| MCEE      | Novel Interactor |
| MED23     | Novel Interactor |
| METTTL21A | Novel Interactor |
| MITF      | Novel Interactor |
| MKRN2     | Novel Interactor |
| MLEC      | Novel Interactor |
| MMADHC    | Novel Interactor |
| MRPL12    | Novel Interactor |
| MRPL19    | Novel Interactor |
| MSL2      | Novel Interactor |
| MSRB2     | Novel Interactor |
| MTCH2     | Novel Interactor |
| MYL9      | Novel Interactor |
| MYO1A     | Novel Interactor |
| MYOCD     | Novel Interactor |
| MYOZ2     | Novel Interactor |
| NAT1      | Novel Interactor |
| NCAPD3    | Novel Interactor |
| NDUFA10   | Novel Interactor |
| NEK1      | Novel Interactor |
| NFX1      | Novel Interactor |
| NKD2      | Novel Interactor |
| NKG7      | Novel Interactor |
| NMI       | Novel Interactor |
| NMUR1     | Novel Interactor |
| NRP1      | Novel Interactor |
| NUP35     | Novel Interactor |
| NXPH1     | Novel Interactor |
| OCM2      | Novel Interactor |
| OOSP2     | Novel Interactor |
| OR10J1    | Novel Interactor |
| OSBPL3    | Novel Interactor |
| OVCH1     | Novel Interactor |
| OVGP1     | Novel Interactor |

|          |                  |
|----------|------------------|
| PAF1     | Novel Interactor |
| PATL1    | Novel Interactor |
| PCDH12   | Novel Interactor |
| PCDH8    | Novel Interactor |
| PCDHGB7  | Novel Interactor |
| PCDHGC4  | Novel Interactor |
| PCDHGC5  | Novel Interactor |
| PCYOX1   | Novel Interactor |
| PDGFB    | Novel Interactor |
| PDIA3    | Novel Interactor |
| PEX10    | Novel Interactor |
| PEX11A   | Novel Interactor |
| PGM3     | Novel Interactor |
| PHF5A    | Novel Interactor |
| PIAS2    | Novel Interactor |
| PIN4     | Novel Interactor |
| PKHD1    | Novel Interactor |
| PLA2G10  | Novel Interactor |
| PLA2G6   | Novel Interactor |
| PLD3     | Novel Interactor |
| PLEKHB2  | Novel Interactor |
| POLR2I   | Novel Interactor |
| PPP2R1A  | Novel Interactor |
| PRICKLE4 | Novel Interactor |
| PRKAG1   | Novel Interactor |
| PRKAR1B  | Novel Interactor |
| PRM1     | Novel Interactor |
| PRO2964  | Novel Interactor |
| PRPF8    | Novel Interactor |
| PTEN     | Novel Interactor |
| PTER     | Novel Interactor |
| PTTG1    | Novel Interactor |
| RAB35    | Novel Interactor |
| RAB5C    | Novel Interactor |
| RAD51AP1 | Novel Interactor |
| RAP1GAP2 | Novel Interactor |
| RDH5     | Novel Interactor |
| REEP2    | Novel Interactor |
| RGS1     | Novel Interactor |
| RGS7     | Novel Interactor |
| RIPPLY2  | Novel Interactor |
| RND1     | Novel Interactor |
| RNF40    | Novel Interactor |
| RPA3     | Novel Interactor |
| RPL18A   | Novel Interactor |
| RPS6KA3  | Novel Interactor |
| RTN4RL1  | Novel Interactor |

|           |                  |
|-----------|------------------|
| RWDD2A    | Novel Interactor |
| S100P     | Novel Interactor |
| SAP30L    | Novel Interactor |
| SATB2-AS1 | Novel Interactor |
| SCAF11    | Novel Interactor |
| SCAMP2    | Novel Interactor |
| SCN1A     | Novel Interactor |
| SEC24A    | Novel Interactor |
| SEMA7A    | Novel Interactor |
| 3-Sep     | Novel Interactor |
| SETBP1    | Novel Interactor |
| SFXN2     | Novel Interactor |
| SGTA      | Novel Interactor |
| SLC22A1   | Novel Interactor |
| SLC35C1   | Novel Interactor |
| SLC44A3   | Novel Interactor |
| SMC1B     | Novel Interactor |
| SMCO4     | Novel Interactor |
| SNAI2     | Novel Interactor |
| SNX15     | Novel Interactor |
| SNX20     | Novel Interactor |
| SP3       | Novel Interactor |
| SPG11     | Novel Interactor |
| SPINK7    | Novel Interactor |
| SRA1      | Novel Interactor |
| SSR4      | Novel Interactor |
| ST5       | Novel Interactor |
| STAM      | Novel Interactor |
| STARD5    | Novel Interactor |
| SULT2A1   | Novel Interactor |
| SYNGR1    | Novel Interactor |
| TACR3     | Novel Interactor |
| TBC1D22A  | Novel Interactor |
| TBCA      | Novel Interactor |
| TDRD9     | Novel Interactor |
| TMED10    | Novel Interactor |
| TMEM56    | Novel Interactor |
| TMSB4XP6  | Novel Interactor |
| TNFAIP8L2 | Novel Interactor |
| TOP1MT    | Novel Interactor |
| TOR1B     | Novel Interactor |
| TP73-AS1  | Novel Interactor |
| TRAM1     | Novel Interactor |
| TRIM4     | Novel Interactor |
| TRMT61A   | Novel Interactor |
| TST       | Novel Interactor |
| TTI1      | Novel Interactor |

|         |                  |
|---------|------------------|
| TTYH3   | Novel Interactor |
| TUBA1C  | Novel Interactor |
| TUFM    | Novel Interactor |
| TULP4   | Novel Interactor |
| UBE4B   | Novel Interactor |
| UGT2B4  | Novel Interactor |
| UNG     | Novel Interactor |
| VANGL1  | Novel Interactor |
| VDR     | Novel Interactor |
| VPS18   | Novel Interactor |
| WBP1L   | Novel Interactor |
| WDR25   | Novel Interactor |
| WFDC1   | Novel Interactor |
| YY1     | Novel Interactor |
| ZAP70   | Novel Interactor |
| ZBTB17  | Novel Interactor |
| ZC3H15  | Novel Interactor |
| ZMYND11 | Novel Interactor |
| ZNF117  | Novel Interactor |
| ZNF219  | Novel Interactor |
| ZNF239  | Novel Interactor |
| ZNF707  | Novel Interactor |
| ZNF804B | Novel Interactor |
| ZSCAN31 | Novel Interactor |
| ZSWIM2  | Novel Interactor |

# Historical Interactome Genes

| <b>Gene</b> | <b>Label</b>     |
|-------------|------------------|
| AKT1        | Candidate gene   |
| APOE        | Candidate gene   |
| BDNF        | Candidate gene   |
| CHRNA7      | Candidate gene   |
| COMT        | Candidate gene   |
| DAO         | Candidate gene   |
| DAOA        | Candidate gene   |
| DISC1       | Candidate gene   |
| DRD2        | Candidate gene   |
| DRD3        | Candidate gene   |
| DRD4        | Candidate gene   |
| DTNBP1      | Candidate gene   |
| GRM3        | Candidate gene   |
| HTR2A       | Candidate gene   |
| KCNN3       | Candidate gene   |
| MTHFR       | Candidate gene   |
| NOTCH4      | Candidate gene   |
| NRG1        | Candidate gene   |
| PPP3CC      | Candidate gene   |
| PRODH       | Candidate gene   |
| RGS4        | Candidate gene   |
| SLC6A3      | Candidate gene   |
| SLC6A4      | Candidate gene   |
| TNF         | Candidate gene   |
| ZDHC8       | Candidate gene   |
| A2M         | Known Interactor |
| ABI3        | Known Interactor |
| ACAP1       | Known Interactor |
| ACE         | Known Interactor |
| ACTG1       | Known Interactor |
| ACTN2       | Known Interactor |
| ADAM17      | Known Interactor |
| ADAM19      | Known Interactor |
| ADAM9       | Known Interactor |
| ADCY6       | Known Interactor |
| ADORA2A     | Known Interactor |
| AGO3        | Known Interactor |
| AGTPBP1     | Known Interactor |
| AHNAK       | Known Interactor |
| AKAP6       | Known Interactor |
| AKAP9       | Known Interactor |
| AKT1S1      | Known Interactor |
| AKT2        | Known Interactor |
| AKTIP       | Known Interactor |

|           |                  |
|-----------|------------------|
| ALB       | Known Interactor |
| ALYREF    | Known Interactor |
| AMPH      | Known Interactor |
| ANKH      | Known Interactor |
| ANKS1B    | Known Interactor |
| AOC1      | Known Interactor |
| APLP2     | Known Interactor |
| APOH      | Known Interactor |
| APP       | Known Interactor |
| APPL1     | Known Interactor |
| AR        | Known Interactor |
| ARFGAP1   | Known Interactor |
| ARFIP2    | Known Interactor |
| ARHGAP29  | Known Interactor |
| ARHGAP32  | Known Interactor |
| ARIH2     | Known Interactor |
| ATF4      | Known Interactor |
| ATF5      | Known Interactor |
| ATF7IP    | Known Interactor |
| ATXN1     | Known Interactor |
| BAD       | Known Interactor |
| BCL10     | Known Interactor |
| BCL2      | Known Interactor |
| BCL2L1    | Known Interactor |
| BCL2L11   | Known Interactor |
| BGN       | Known Interactor |
| BICD1     | Known Interactor |
| BLOC1S5   | Known Interactor |
| BLOC1S6   | Known Interactor |
| BMPR1B    | Known Interactor |
| BPGM      | Known Interactor |
| BRAF      | Known Interactor |
| BRCA1     | Known Interactor |
| BRF1      | Known Interactor |
| BRK1      | Known Interactor |
| BZRAP1    | Known Interactor |
| C14orf166 | Known Interactor |
| C19orf52  | Known Interactor |
| C19orf66  | Known Interactor |
| CABIN1    | Known Interactor |
| CADPS     | Known Interactor |
| CADPS2    | Known Interactor |
| CALM1     | Known Interactor |
| CALR      | Known Interactor |
| CAMKK1    | Known Interactor |
| CANX      | Known Interactor |
| CARHSP1   | Known Interactor |



|          |                  |
|----------|------------------|
| CASP3    | Known Interactor |
| CASP9    | Known Interactor |
| CCDC136  | Known Interactor |
| CCDC141  | Known Interactor |
| CCDC146  | Known Interactor |
| CCDC153  | Known Interactor |
| CCDC24   | Known Interactor |
| CCDC53   | Known Interactor |
| CCDC88A  | Known Interactor |
| CCHCR1   | Known Interactor |
| CCNA2    | Known Interactor |
| CCND3    | Known Interactor |
| CDC27    | Known Interactor |
| CDC37    | Known Interactor |
| CDC5L    | Known Interactor |
| CDK5RAP3 | Known Interactor |
| CDKN1A   | Known Interactor |
| CDKN1B   | Known Interactor |
| CDKN1C   | Known Interactor |
| CEP126   | Known Interactor |
| CEP170   | Known Interactor |
| CEP57L1  | Known Interactor |
| CEP63    | Known Interactor |
| CHEK1    | Known Interactor |
| CHN2     | Known Interactor |
| CHUK     | Known Interactor |
| CIT      | Known Interactor |
| CLIC6    | Known Interactor |
| CLIP3    | Known Interactor |
| CLK2     | Known Interactor |
| CLU      | Known Interactor |
| CMYA5    | Known Interactor |
| CNTF     | Known Interactor |
| COL4A1   | Known Interactor |
| COPB1    | Known Interactor |
| COPB2    | Known Interactor |
| CPE      | Known Interactor |
| CREB1    | Known Interactor |
| CREBBP   | Known Interactor |
| CSF1     | Known Interactor |
| CSNK2A1  | Known Interactor |
| CSNK2B   | Known Interactor |
| CTNNB1   | Known Interactor |
| CTSB     | Known Interactor |
| CYLD     | Known Interactor |
| CYP2C18  | Known Interactor |
| CYP2C8   | Known Interactor |

|          |                  |
|----------|------------------|
| DAB2IP   | Known Interactor |
| DCN      | Known Interactor |
| DCTN1    | Known Interactor |
| DCTN2    | Known Interactor |
| DGCR6L   | Known Interactor |
| DLC1     | Known Interactor |
| DLG4     | Known Interactor |
| DLL4     | Known Interactor |
| DMD      | Known Interactor |
| DNAJB1   | Known Interactor |
| DNAJC7   | Known Interactor |
| DNMT1    | Known Interactor |
| DPYSL2   | Known Interactor |
| DPYSL3   | Known Interactor |
| DST      | Known Interactor |
| DTNA     | Known Interactor |
| DTNB     | Known Interactor |
| DYNC1H1  | Known Interactor |
| ECSIT    | Known Interactor |
| EEF1B2   | Known Interactor |
| EEF1G    | Known Interactor |
| EEF2     | Known Interactor |
| EGF      | Known Interactor |
| EGFL7    | Known Interactor |
| EGFR     | Known Interactor |
| EIF3F    | Known Interactor |
| EIF3H    | Known Interactor |
| EIF4EBP1 | Known Interactor |
| ELAVL1   | Known Interactor |
| ELOVL7   | Known Interactor |
| EP300    | Known Interactor |
| EPB41    | Known Interactor |
| EPB41L1  | Known Interactor |
| EPB41L2  | Known Interactor |
| EPN2     | Known Interactor |
| ERBB2    | Known Interactor |
| ERBB3    | Known Interactor |
| ERBB4    | Known Interactor |
| ESR1     | Known Interactor |
| ESR2     | Known Interactor |
| EXOC1    | Known Interactor |
| EXOC4    | Known Interactor |
| EXOC7    | Known Interactor |
| EZH2     | Known Interactor |
| F11R     | Known Interactor |
| FANCA    | Known Interactor |
| FARSA    | Known Interactor |

|           |                  |
|-----------|------------------|
| FBXL12    | Known Interactor |
| FBXO41    | Known Interactor |
| FBXW7     | Known Interactor |
| FEZ1      | Known Interactor |
| FLNA      | Known Interactor |
| FOXG1     | Known Interactor |
| FOXO1     | Known Interactor |
| FOXO3     | Known Interactor |
| FOXO4     | Known Interactor |
| FRYL      | Known Interactor |
| FXD7      | Known Interactor |
| FYN       | Known Interactor |
| GAB2      | Known Interactor |
| GABBR1    | Known Interactor |
| GABRA1    | Known Interactor |
| GATA1     | Known Interactor |
| GATA2     | Known Interactor |
| GCDH      | Known Interactor |
| GIPC1     | Known Interactor |
| GLTSCR1L  | Known Interactor |
| GLUL      | Known Interactor |
| GNA11     | Known Interactor |
| GNAI1     | Known Interactor |
| GNAI2     | Known Interactor |
| GNAI3     | Known Interactor |
| GNAO1     | Known Interactor |
| GNAQ      | Known Interactor |
| GNAZ      | Known Interactor |
| GNB1      | Known Interactor |
| GNB2L1    | Known Interactor |
| GNPTAB    | Known Interactor |
| GPRASP2   | Known Interactor |
| GRASP     | Known Interactor |
| GRB10     | Known Interactor |
| GRB2      | Known Interactor |
| GRIA2     | Known Interactor |
| GRIP1     | Known Interactor |
| GSK3A     | Known Interactor |
| GSK3B     | Known Interactor |
| HAUS1     | Known Interactor |
| HAX1      | Known Interactor |
| HERC2P2   | Known Interactor |
| HIST2H2BE | Known Interactor |
| HMOX1     | Known Interactor |
| HSP90AA1  | Known Interactor |
| HSP90AB1  | Known Interactor |
| HSPB1     | Known Interactor |

|          |                  |
|----------|------------------|
| HTRA1    | Known Interactor |
| HTT      | Known Interactor |
| IFIT3    | Known Interactor |
| IFIT5    | Known Interactor |
| IFNG     | Known Interactor |
| IFT20    | Known Interactor |
| IKBKB    | Known Interactor |
| IKZF4    | Known Interactor |
| ILK      | Known Interactor |
| IMMT     | Known Interactor |
| IMPDH2   | Known Interactor |
| INPP5K   | Known Interactor |
| IPO5     | Known Interactor |
| IQSEC1   | Known Interactor |
| IRAK1    | Known Interactor |
| IRS1     | Known Interactor |
| ITGB3    | Known Interactor |
| ITPKC    | Known Interactor |
| ITPR1    | Known Interactor |
| ITPR3    | Known Interactor |
| ITSN1    | Known Interactor |
| JADE1    | Known Interactor |
| JAK2     | Known Interactor |
| JUNB     | Known Interactor |
| KALRN    | Known Interactor |
| KANSL1   | Known Interactor |
| KAT2B    | Known Interactor |
| KAT6A    | Known Interactor |
| KCNJ6    | Known Interactor |
| KCNJ9    | Known Interactor |
| KCNQ5    | Known Interactor |
| KIAA0408 | Known Interactor |
| KIF3A    | Known Interactor |
| KIF3C    | Known Interactor |
| KIFAP3   | Known Interactor |
| KIFC3    | Known Interactor |
| KLHL12   | Known Interactor |
| KRIT1    | Known Interactor |
| KRT10    | Known Interactor |
| KRT31    | Known Interactor |
| KRT40    | Known Interactor |
| KRTAP5-9 | Known Interactor |
| KTN1     | Known Interactor |
| LCAT     | Known Interactor |
| LDLR     | Known Interactor |
| LIMK1    | Known Interactor |
| LITAF    | Known Interactor |

|          |                  |
|----------|------------------|
| LONP1    | Known Interactor |
| LOXL4    | Known Interactor |
| LRP1     | Known Interactor |
| LRP2     | Known Interactor |
| LRP8     | Known Interactor |
| LRRK2    | Known Interactor |
| LSM8     | Known Interactor |
| LYN      | Known Interactor |
| MACF1    | Known Interactor |
| MAML1    | Known Interactor |
| MAML2    | Known Interactor |
| MAML3    | Known Interactor |
| MAP1A    | Known Interactor |
| MAP2     | Known Interactor |
| MAP2K4   | Known Interactor |
| MAP3K11  | Known Interactor |
| MAP3K5   | Known Interactor |
| MAP3K8   | Known Interactor |
| MAPK14   | Known Interactor |
| MAPK8IP1 | Known Interactor |
| MAPKAPK2 | Known Interactor |
| MAPT     | Known Interactor |
| MAST1    | Known Interactor |
| MATR3    | Known Interactor |
| MBTPS1   | Known Interactor |
| MDM2     | Known Interactor |
| MDM4     | Known Interactor |
| MEMO1    | Known Interactor |
| METTL1   | Known Interactor |
| MID1IP1  | Known Interactor |
| MLLT10   | Known Interactor |
| MMP17    | Known Interactor |
| MPDZ     | Known Interactor |
| MPPED1   | Known Interactor |
| MRPL28   | Known Interactor |
| MS4A2    | Known Interactor |
| MST1R    | Known Interactor |
| MTCP1    | Known Interactor |
| MTOR     | Known Interactor |
| MUL1     | Known Interactor |
| MVP      | Known Interactor |
| MXD1     | Known Interactor |
| MYO1A    | Known Interactor |
| MYT1L    | Known Interactor |
| NBEA     | Known Interactor |
| NCAM1    | Known Interactor |
| NCK1     | Known Interactor |

|          |                  |
|----------|------------------|
| NCOA4    | Known Interactor |
| NCOR2    | Known Interactor |
| NCS1     | Known Interactor |
| NDE1     | Known Interactor |
| NDEL1    | Known Interactor |
| NDN      | Known Interactor |
| NDUFB10  | Known Interactor |
| NEDD4    | Known Interactor |
| NEFM     | Known Interactor |
| NF2      | Known Interactor |
| NFKBIA   | Known Interactor |
| NME3     | Known Interactor |
| NOS3     | Known Interactor |
| NOTCH1   | Known Interactor |
| NR4A1    | Known Interactor |
| NSF      | Known Interactor |
| NTF3     | Known Interactor |
| NTRK2    | Known Interactor |
| NTRK3    | Known Interactor |
| NUF2     | Known Interactor |
| NUP160   | Known Interactor |
| OLFM1    | Known Interactor |
| P4HA3    | Known Interactor |
| PAFAH1B1 | Known Interactor |
| PAK1     | Known Interactor |
| PAK6     | Known Interactor |
| PAWR     | Known Interactor |
| PCMT1    | Known Interactor |
| PCNT     | Known Interactor |
| PCNXL4   | Known Interactor |
| PDCD4    | Known Interactor |
| PDE3B    | Known Interactor |
| PDE4B    | Known Interactor |
| PDIK1L   | Known Interactor |
| PDK2     | Known Interactor |
| PDPK1    | Known Interactor |
| PEA15    | Known Interactor |
| PEX5     | Known Interactor |
| PFKFB1   | Known Interactor |
| PFKFB2   | Known Interactor |
| PGK1     | Known Interactor |
| PHB2     | Known Interactor |
| PI4K2B   | Known Interactor |
| PIAS1    | Known Interactor |
| PIAS2    | Known Interactor |
| PICK1    | Known Interactor |
| PIK3R1   | Known Interactor |

|          |                  |
|----------|------------------|
| PKN2     | Known Interactor |
| PLCB1    | Known Interactor |
| PLCG1    | Known Interactor |
| PLEKHA6  | Known Interactor |
| PLEKHO1  | Known Interactor |
| PLTP     | Known Interactor |
| PLXNA1   | Known Interactor |
| PON2     | Known Interactor |
| POU2F1   | Known Interactor |
| PPARGC1B | Known Interactor |
| PPL      | Known Interactor |
| PPM1A    | Known Interactor |
| PPM1E    | Known Interactor |
| PPP1CA   | Known Interactor |
| PPP1R9B  | Known Interactor |
| PPP2CA   | Known Interactor |
| PPP2R1A  | Known Interactor |
| PPP2R4   | Known Interactor |
| PPP4R1   | Known Interactor |
| PPP5C    | Known Interactor |
| PRAM1    | Known Interactor |
| PRDX2    | Known Interactor |
| PRG2     | Known Interactor |
| PRKAB2   | Known Interactor |
| PRKCQ    | Known Interactor |
| PRKCZ    | Known Interactor |
| PRKDC    | Known Interactor |
| PRNP     | Known Interactor |
| PRTN3    | Known Interactor |
| PSEN1    | Known Interactor |
| PSEN2    | Known Interactor |
| PSME3    | Known Interactor |
| PTAFR    | Known Interactor |
| PTEN     | Known Interactor |
| PTPN1    | Known Interactor |
| RAB11A   | Known Interactor |
| RAB3D    | Known Interactor |
| RABGAP1  | Known Interactor |
| RAC1     | Known Interactor |
| RAD21    | Known Interactor |
| RAF1     | Known Interactor |
| RANBP9   | Known Interactor |
| RARA     | Known Interactor |
| RASSF7   | Known Interactor |
| RBPJ     | Known Interactor |
| RBSN     | Known Interactor |
| RC3H1    | Known Interactor |

|         |                  |
|---------|------------------|
| RDX     | Known Interactor |
| RGCC    | Known Interactor |
| RGS2    | Known Interactor |
| RHEB    | Known Interactor |
| RHEBL1  | Known Interactor |
| RICTOR  | Known Interactor |
| RIPK1   | Known Interactor |
| RNF11   | Known Interactor |
| RNF115  | Known Interactor |
| RNF32   | Known Interactor |
| ROGDI   | Known Interactor |
| RPL4    | Known Interactor |
| RPS6KA3 | Known Interactor |
| RPS6KB1 | Known Interactor |
| RQCD1   | Known Interactor |
| S1PR1   | Known Interactor |
| SCARB1  | Known Interactor |
| SDC2    | Known Interactor |
| SDCBP   | Known Interactor |
| SETDB1  | Known Interactor |
| SFR1    | Known Interactor |
| SH2B2   | Known Interactor |
| SH3BP5  | Known Interactor |
| SH3RF1  | Known Interactor |
| SIRT1   | Known Interactor |
| SIRT6   | Known Interactor |
| SKI     | Known Interactor |
| SKP2    | Known Interactor |
| SMAD2   | Known Interactor |
| SMAD3   | Known Interactor |
| SMAD4   | Known Interactor |
| SMAD7   | Known Interactor |
| SMARCB1 | Known Interactor |
| SMARCC1 | Known Interactor |
| SMARCE1 | Known Interactor |
| SMC2    | Known Interactor |
| SMC3    | Known Interactor |
| SNAPIN  | Known Interactor |
| SNCA    | Known Interactor |
| SNTA1   | Known Interactor |
| SNX6    | Known Interactor |
| SORBS2  | Known Interactor |
| SORBS3  | Known Interactor |
| SORT1   | Known Interactor |
| SPARCL1 | Known Interactor |
| SPTAN1  | Known Interactor |
| SPTBN1  | Known Interactor |



|          |                  |
|----------|------------------|
| SPTBN4   | Known Interactor |
| SRC      | Known Interactor |
| SRGAP2   | Known Interactor |
| SRGAP3   | Known Interactor |
| SSC5D    | Known Interactor |
| SSTR5    | Known Interactor |
| ST13     | Known Interactor |
| STAT1    | Known Interactor |
| STK3     | Known Interactor |
| STK4     | Known Interactor |
| STX18    | Known Interactor |
| STX1A    | Known Interactor |
| SYBU     | Known Interactor |
| SYNE1    | Known Interactor |
| TBC1D4   | Known Interactor |
| TCEB1    | Known Interactor |
| TCL1A    | Known Interactor |
| TCL1B    | Known Interactor |
| TCL6     | Known Interactor |
| TERF2IP  | Known Interactor |
| TERT     | Known Interactor |
| TFIP11   | Known Interactor |
| TGFB111  | Known Interactor |
| TGFBR1   | Known Interactor |
| THAP7    | Known Interactor |
| THEM4    | Known Interactor |
| TIAM2    | Known Interactor |
| TNFAIP3  | Known Interactor |
| TNFRSF1A | Known Interactor |
| TNFRSF1B | Known Interactor |
| TNFSF11  | Known Interactor |
| TNIK     | Known Interactor |
| TNKS     | Known Interactor |
| TOPBP1   | Known Interactor |
| TRADD    | Known Interactor |
| TRAF2    | Known Interactor |
| TRAF3IP1 | Known Interactor |
| TRIB3    | Known Interactor |
| TRIM13   | Known Interactor |
| TRIM2    | Known Interactor |
| TRIM27   | Known Interactor |
| TRIM32   | Known Interactor |
| TRIM9    | Known Interactor |
| TRIO     | Known Interactor |
| TRIP13   | Known Interactor |
| TSC1     | Known Interactor |
| TSC2     | Known Interactor |

|         |                  |
|---------|------------------|
| TTC3    | Known Interactor |
| TUBB    | Known Interactor |
| TUBB2A  | Known Interactor |
| TXLNB   | Known Interactor |
| TYRO3   | Known Interactor |
| USP4    | Known Interactor |
| USP48   | Known Interactor |
| UTRN    | Known Interactor |
| UXS1    | Known Interactor |
| VEGFA   | Known Interactor |
| VIM     | Known Interactor |
| VKORC1  | Known Interactor |
| VLDLR   | Known Interactor |
| WNK1    | Known Interactor |
| WNK4    | Known Interactor |
| XIAP    | Known Interactor |
| XPNPEP1 | Known Interactor |
| XRN2    | Known Interactor |
| YAP1    | Known Interactor |
| YBX1    | Known Interactor |
| YWHAE   | Known Interactor |
| YWHAG   | Known Interactor |
| YWHAQ   | Known Interactor |
| YWHAZ   | Known Interactor |
| ZFP36L1 | Known Interactor |
| ZHX1    | Known Interactor |
| ZNF197  | Known Interactor |
| ZNF365  | Known Interactor |
| ZNF490  | Known Interactor |
| ZNF558  | Known Interactor |
| ADCY10  | Novel Interactor |
| ADGRA2  | Novel Interactor |
| AHRR    | Novel Interactor |
| ALDH3A2 | Novel Interactor |
| APBA3   | Novel Interactor |
| APOA5   | Novel Interactor |
| APOC1   | Novel Interactor |
| APOC2   | Novel Interactor |
| APOC4   | Novel Interactor |
| AQR     | Novel Interactor |
| ARGLU1  | Novel Interactor |
| ARHGAP1 | Novel Interactor |
| ATP2B1  | Novel Interactor |
| BET1    | Novel Interactor |
| BLOC1S3 | Novel Interactor |
| BRS3    | Novel Interactor |
| BYSL    | Novel Interactor |

|            |                  |
|------------|------------------|
| C2         | Novel Interactor |
| C22orf29   | Novel Interactor |
| CA3        | Novel Interactor |
| CAP2       | Novel Interactor |
| CARS       | Novel Interactor |
| CASP1      | Novel Interactor |
| CBWD1      | Novel Interactor |
| CCAR1      | Novel Interactor |
| CD1D       | Novel Interactor |
| CD3E       | Novel Interactor |
| CD3G       | Novel Interactor |
| CD44       | Novel Interactor |
| CD59       | Novel Interactor |
| CD79A      | Novel Interactor |
| CDC42      | Novel Interactor |
| CDK2AP1    | Novel Interactor |
| CEACAM1    | Novel Interactor |
| CEBPD      | Novel Interactor |
| CNST       | Novel Interactor |
| CRABP2     | Novel Interactor |
| CSGALNACT1 | Novel Interactor |
| CST1       | Novel Interactor |
| CTSG       | Novel Interactor |
| CYP51A1    | Novel Interactor |
| DACH1      | Novel Interactor |
| DDR2       | Novel Interactor |
| DDX21      | Novel Interactor |
| DEGS1      | Novel Interactor |
| DEK        | Novel Interactor |
| DIRAS3     | Novel Interactor |
| DKK4       | Novel Interactor |
| E2F6       | Novel Interactor |
| EGLN1      | Novel Interactor |
| ENTPD4     | Novel Interactor |
| ETNK1      | Novel Interactor |
| EXTL1      | Novel Interactor |
| FBXO21     | Novel Interactor |
| FGFR1      | Novel Interactor |
| FHL2       | Novel Interactor |
| GFRA2      | Novel Interactor |
| GGT3P      | Novel Interactor |
| GPC6       | Novel Interactor |
| GSC2       | Novel Interactor |
| HCK        | Novel Interactor |
| HDGFL1     | Novel Interactor |
| HOPX       | Novel Interactor |
| IL10RA     | Novel Interactor |

|          |                  |
|----------|------------------|
| ILF2     | Novel Interactor |
| INPPL1   | Novel Interactor |
| ISG20    | Novel Interactor |
| ITM2C    | Novel Interactor |
| KCNC4    | Novel Interactor |
| KCNK4    | Novel Interactor |
| KIF2C    | Novel Interactor |
| LEPROTL1 | Novel Interactor |
| LIPF     | Novel Interactor |
| MBTPS2   | Novel Interactor |
| MEIS2    | Novel Interactor |
| MICAL3   | Novel Interactor |
| MIS12    | Novel Interactor |
| MKI67    | Novel Interactor |
| MMP23B   | Novel Interactor |
| MOB1B    | Novel Interactor |
| MPPED2   | Novel Interactor |
| MPZ      | Novel Interactor |
| MRPL36   | Novel Interactor |
| MRPL40   | Novel Interactor |
| MRPS5    | Novel Interactor |
| MSH5     | Novel Interactor |
| MYO16    | Novel Interactor |
| NEU1     | Novel Interactor |
| NFKBIL1  | Novel Interactor |
| NFYA     | Novel Interactor |
| NQO2     | Novel Interactor |
| NUP153   | Novel Interactor |
| OCM2     | Novel Interactor |
| OSMR     | Novel Interactor |
| PBX2     | Novel Interactor |
| PCDH9    | Novel Interactor |
| PFDN2    | Novel Interactor |
| PILRB    | Novel Interactor |
| POLE2    | Novel Interactor |
| PPIL2    | Novel Interactor |
| PPP1R11  | Novel Interactor |
| PRDM4    | Novel Interactor |
| PSG7     | Novel Interactor |
| PSMB8    | Novel Interactor |
| PSMC3    | Novel Interactor |
| RANBP1   | Novel Interactor |
| RBM22    | Novel Interactor |
| RFXAP    | Novel Interactor |
| RNF144B  | Novel Interactor |
| RRM1     | Novel Interactor |
| RTN4R    | Novel Interactor |

|         |                        |
|---------|------------------------|
| SDHC    | Novel Interactor       |
|         | 5-Sep Novel Interactor |
| SGSH    | Novel Interactor       |
| SKIV2L  | Novel Interactor       |
| SLC18A1 | Novel Interactor       |
| SLC22A1 | Novel Interactor       |
| SLC27A3 | Novel Interactor       |
| SLC27A4 | Novel Interactor       |
| SPTSSB  | Novel Interactor       |
| SUGT1   | Novel Interactor       |
| TAPBP   | Novel Interactor       |
| TBX1    | Novel Interactor       |
| TDP2    | Novel Interactor       |
| TNXB    | Novel Interactor       |
| TP53BP2 | Novel Interactor       |
| TP73    | Novel Interactor       |
| TPMT    | Novel Interactor       |
| UAP1    | Novel Interactor       |
| UBAP2L  | Novel Interactor       |
| UNG     | Novel Interactor       |
| VWA5A   | Novel Interactor       |
| WWP2    | Novel Interactor       |
| ZBP1    | Novel Interactor       |
| ZBTB17  | Novel Interactor       |
| ZNF219  | Novel Interactor       |
| ZNF239  | Novel Interactor       |
| ZNF43   | Novel Interactor       |
| ZNF804B | Novel Interactor       |
