# Supplementary material for: Schizophrenia interactome with 504 novel protein–protein interactions
Source: PubMed Central journal article supplement (PMC4898894; doi:10.1038/npjschz.2016.12), 2016-04-27

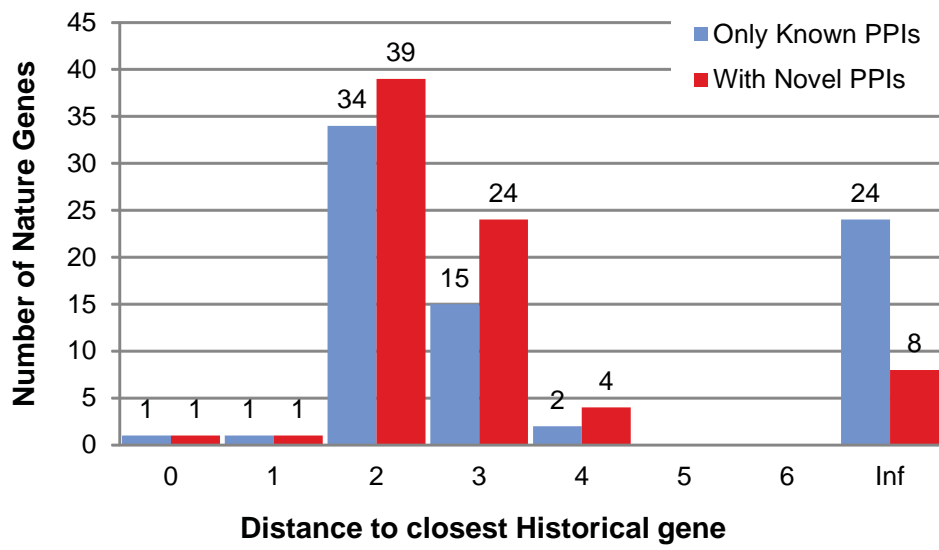

Supplement: npjschz201612-s7.pdf [file npjschz201612-s7.pdf]
