# Supplementary material for: Schizophrenia interactome with 504 novel protein–protein interactions
Source: PubMed Central journal article supplement (PMC4898894; doi:10.1038/npjschz.2016.12), 2016-04-27
Supplement: npjschz201612-s10.pdf [file npjschz201612-s10.pdf]

## Drugs of GWAS Gene Interactome

| Gene Type      | EntrezID | Gene Symbol | DrugBank ID | Drug Name              | Anatomic | Category    |          |
|----------------|----------|-------------|-------------|------------------------|----------|-------------|----------|
|                |          |             |             |                        |          | Therapeutic | Chemical |
| Candidate Gene | 775      | CACNA1C     | DB01373     | Calcium                | A        | 2           | AC01     |
| Candidate Gene | 775      | CACNA1C     | DB01373     | Calcium                | A        | 2           | AC02     |
| Candidate Gene | 775      | CACNA1C     | DB06751     | Drotaverine            | A        | 3           | AD02     |
| Candidate Gene | 775      | CACNA1C     | DB00653     | Magnesium Sulfate      | A        | 6           | AD04     |
| Candidate Gene | 775      | CACNA1C     | DB01373     | Calcium                | A        | 6           | AC08     |
| Candidate Gene | 775      | CACNA1C     | DB01373     | Calcium                | A        | 7           | XA03     |
| Candidate Gene | 775      | CACNA1C     | DB01373     | Calcium                | A        | 11          | HA31     |
| Candidate Gene | 775      | CACNA1C     | DB00653     | Magnesium Sulfate      | A        | 12          | CC02     |
| Candidate Gene | 775      | CACNA1C     | DB01373     | Calcium                | A        | 12          | AA01     |
| Candidate Gene | 775      | CACNA1C     | DB01373     | Calcium                | A        | 12          | AA02     |
| Candidate Gene | 775      | CACNA1C     | DB01373     | Calcium                | A        | 12          | AA03     |
| Candidate Gene | 775      | CACNA1C     | DB01373     | Calcium                | A        | 12          | AA04     |
| Candidate Gene | 775      | CACNA1C     | DB01373     | Calcium                | A        | 12          | AA05     |
| Candidate Gene | 775      | CACNA1C     | DB01373     | Calcium                | A        | 12          | AA06     |
| Candidate Gene | 775      | CACNA1C     | DB01373     | Calcium                | A        | 12          | AA08     |
| Candidate Gene | 775      | CACNA1C     | DB01373     | Calcium                | A        | 12          | AA09     |
| Candidate Gene | 775      | CACNA1C     | DB01373     | Calcium                | A        | 12          | AA10     |
| Candidate Gene | 775      | CACNA1C     | DB01373     | Calcium                | A        | 12          | AA11     |
| Candidate Gene | 775      | CACNA1C     | DB01373     | Calcium                | A        | 12          | AA20     |
| Candidate Gene | 775      | CACNA1C     | DB01373     | Calcium                | A        | 12          | AA30     |
| Candidate Gene | 783      | CACNB2      | DB00653     | Magnesium Sulfate      | A        | 6           | AD04     |
| Candidate Gene | 783      | CACNB2      | DB00653     | Magnesium Sulfate      | A        | 12          | CC02     |
| Candidate Gene | 2903     | GRIN2A      | DB00142     | L-Glutamic Acid        | A        | 9           | AB01     |
| Candidate Gene | 2903     | GRIN2A      | DB06593     | Dehydroepiandrosterone | A        | 14          | AA07     |
| Candidate Gene | 6472     | SHMT2       | DB00114     | Pyridoxal Phosphate    | A        | 11          | HA02     |
| Candidate Gene | 6472     | SHMT2       | DB00114     | Pyridoxal Phosphate    | A        | 11          | HA06     |
| Candidate Gene | 775      | CACNA1C     | DB01373     | Calcium                | B        | 1           | AC08     |
| Candidate Gene | 775      | CACNA1C     | DB01373     | Calcium                | B        | 2           | BC08     |
| Candidate Gene | 775      | CACNA1C     | DB00653     | Magnesium Sulfate      | B        | 5           | XA05     |
| Candidate Gene | 783      | CACNB2      | DB00653     | Magnesium Sulfate      | B        | 5           | XA05     |

|                |      |         |         |              |   |   |      |
|----------------|------|---------|---------|--------------|---|---|------|
| Candidate Gene | 2903 | GRIN2A  | DB00145 | Glycine      | B | 3 | AA01 |
| Candidate Gene | 2903 | GRIN2A  | DB00145 | Glycine      | B | 5 | CX03 |
| Candidate Gene | 5740 | PTGIS   | DB01240 | Epoprostenol | B | 1 | AC09 |
| Candidate Gene | 6472 | SHMT2   | DB00145 | Glycine      | B | 3 | AA01 |
| Candidate Gene | 6472 | SHMT2   | DB00145 | Glycine      | B | 5 | CX03 |
| Candidate Gene | 775  | CACNA1C | DB00308 | Ibutilide    | C | 1 | BD05 |
| Candidate Gene | 775  | CACNA1C | DB04855 | Dronedarone  | C | 1 | BD07 |
| Candidate Gene | 775  | CACNA1C | DB00421 | Spirolactone | C | 3 | DA01 |
| Candidate Gene | 775  | CACNA1C | DB01373 | Calcium      | C | 5 | BX01 |
| Candidate Gene | 775  | CACNA1C | DB00270 | Isradipine   | C | 8 | CA03 |
| Candidate Gene | 775  | CACNA1C | DB00381 | Amlodipine   | C | 8 | CA01 |
| Candidate Gene | 775  | CACNA1C | DB00393 | Nimodipine   | C | 8 | CA06 |
| Candidate Gene | 775  | CACNA1C | DB00401 | Nisoldipine  | C | 8 | CA07 |
| Candidate Gene | 775  | CACNA1C | DB00622 | Nicardipine  | C | 8 | CA04 |
| Candidate Gene | 775  | CACNA1C | DB00661 | Verapamil    | C | 8 | DA01 |
| Candidate Gene | 775  | CACNA1C | DB01023 | Felodipine   | C | 8 | CA02 |
| Candidate Gene | 775  | CACNA1C | DB01054 | Nitrendipine | C | 8 | CA08 |
| Candidate Gene | 775  | CACNA1C | DB01115 | Nifedipine   | C | 8 | CA05 |
| Candidate Gene | 775  | CACNA1C | DB01388 | Mibefradil   | C | 8 | CX01 |
| Candidate Gene | 775  | CACNA1C | DB06712 | Nilvadipine  | C | 8 | CA10 |
| Candidate Gene | 8911 | CACNA1I | DB00421 | Spirolactone | C | 3 | DA01 |
| Candidate Gene | 8911 | CACNA1I | DB00661 | Verapamil    | C | 8 | DA01 |
| Candidate Gene | 8911 | CACNA1I | DB01388 | Mibefradil   | C | 8 | CX01 |
| Candidate Gene | 783  | CACNB2  | DB04855 | Dronedarone  | C | 1 | BD07 |
| Candidate Gene | 783  | CACNB2  | DB00421 | Spirolactone | C | 3 | DA01 |
| Candidate Gene | 783  | CACNB2  | DB00270 | Isradipine   | C | 8 | CA03 |
| Candidate Gene | 783  | CACNB2  | DB00381 | Amlodipine   | C | 8 | CA01 |
| Candidate Gene | 783  | CACNB2  | DB00393 | Nimodipine   | C | 8 | CA06 |
| Candidate Gene | 783  | CACNB2  | DB00401 | Nisoldipine  | C | 8 | CA07 |
| Candidate Gene | 783  | CACNB2  | DB00622 | Nicardipine  | C | 8 | CA04 |
| Candidate Gene | 783  | CACNB2  | DB00661 | Verapamil    | C | 8 | DA01 |
| Candidate Gene | 783  | CACNB2  | DB01023 | Felodipine   | C | 8 | CA02 |
| Candidate Gene | 783  | CACNB2  | DB01054 | Nitrendipine | C | 8 | CA08 |
| Candidate Gene | 783  | CACNB2  | DB01115 | Nifedipine   | C | 8 | CA05 |

|                |      |         |         |                   |   |    |      |
|----------------|------|---------|---------|-------------------|---|----|------|
| Candidate Gene | 783  | CACNB2  | DB01388 | Mibefradil        | C | 8  | CX01 |
| Candidate Gene | 783  | CACNB2  | DB06712 | Nilvadipine       | C | 8  | CA10 |
| Candidate Gene | 775  | CACNA1C | DB01373 | Calcium           | D | 3  | AX04 |
| Candidate Gene | 775  | CACNA1C | DB00653 | Magnesium Sulfate | D | 11 | AX05 |
| Candidate Gene | 775  | CACNA1C | DB01373 | Calcium           | D | 11 | AX03 |
| Candidate Gene | 783  | CACNB2  | DB00653 | Magnesium Sulfate | D | 11 | AX05 |
| Candidate Gene | 775  | CACNA1C | DB01373 | Calcium           | J | 4  | AA03 |
| Candidate Gene | 5740 | PTGIS   | DB08343 | Phenylbutazone    | M | 1  | AA01 |
| Candidate Gene | 5740 | PTGIS   | DB08343 | Phenylbutazone    | M | 2  | AA01 |
| Candidate Gene | 775  | CACNA1C | DB01373 | Calcium           | N | 2  | BA15 |
| Candidate Gene | 775  | CACNA1C | DB00568 | Cinnarizine       | N | 7  | CA02 |
| Candidate Gene | 775  | CACNA1C | DB01373 | Calcium           | N | 7  | BB02 |
| Candidate Gene | 8911 | CACNA1I | DB00617 | Paramethadione    | N | 3  | AC01 |
| Candidate Gene | 8911 | CACNA1I | DB00909 | Zonisamide        | N | 3  | AX15 |
| Candidate Gene | 8911 | CACNA1I | DB00568 | Cinnarizine       | N | 7  | CA02 |
| Candidate Gene | 8911 | CACNA1I | DB04841 | Flunarizine       | N | 7  | CA03 |
| Candidate Gene | 2903 | GRIN2A  | DB02330 | Halothane         | N | 1  | AB01 |
| Candidate Gene | 2903 | GRIN2A  | DB00454 | Pethidine         | N | 2  | AB02 |
| Candidate Gene | 2903 | GRIN2A  | DB06738 | Ketobemidone      | N | 2  | AB01 |
| Candidate Gene | 2903 | GRIN2A  | DB00949 | Felbamate         | N | 3  | AX10 |
| Candidate Gene | 2903 | GRIN2A  | DB00996 | Gabapentin        | N | 3  | AX12 |
| Candidate Gene | 2903 | GRIN2A  | DB01174 | Phenobarbital     | N | 3  | AA02 |
| Candidate Gene | 2903 | GRIN2A  | DB00312 | Pentobarbital     | N | 5  | CA01 |
| Candidate Gene | 2903 | GRIN2A  | DB00418 | Secobarbital      | N | 5  | CA06 |
| Candidate Gene | 2903 | GRIN2A  | DB00289 | Atomoxetine       | N | 6  | BA09 |
| Candidate Gene | 2903 | GRIN2A  | DB01043 | Memantine         | N | 6  | DX01 |
| Candidate Gene | 2903 | GRIN2A  | DB04896 | Milnacipran       | N | 6  | AX17 |
| Candidate Gene | 2903 | GRIN2A  | DB00659 | Acamprosate       | N | 7  | BB03 |
| Candidate Gene | 775  | CACNA1C | DB01373 | Calcium           | R | 1  | AX01 |
| Candidate Gene | 775  | CACNA1C | DB01373 | Calcium           | V | 3  | AE01 |
| Candidate Gene | 775  | CACNA1C | DB01373 | Calcium           | V | 3  | AF04 |
| Candidate Gene | 775  | CACNA1C | DB00653 | Magnesium Sulfate | V | 4  | CC02 |
| Candidate Gene | 775  | CACNA1C | DB01373 | Calcium           | V | 8  | AC10 |
| Candidate Gene | 783  | CACNB2  | DB00653 | Magnesium Sulfate | V | 4  | CC02 |

|                  |        |        |         |                      |   |    |      |
|------------------|--------|--------|---------|----------------------|---|----|------|
| Known Interactor | 240    | ALOX5  | DB01017 | Minocycline          | A | 1  | AB23 |
| Known Interactor | 1956   | EGFR   | DB05291 | Lidocaine            | A | 1  | AD11 |
| Known Interactor | 4790   | NFKB1  | DB00945 | Acetylsalicylic acid | A | 1  | AD05 |
| Known Interactor | 5562   | PRKAA1 | DB00945 | Acetylsalicylic acid | A | 1  | AD05 |
| Known Interactor | 5565   | PRKAB2 | DB00945 | Acetylsalicylic acid | A | 1  | AD05 |
| Known Interactor | 5742   | PTGS1  | DB00945 | Acetylsalicylic acid | A | 1  | AD05 |
| Known Interactor | 5743   | PTGS2  | DB00945 | Acetylsalicylic acid | A | 1  | AD05 |
| Known Interactor | 7157   | TP53   | DB00945 | Acetylsalicylic acid | A | 1  | AD05 |
| Known Interactor | 801    | CALM1  | DB01373 | Calcium              | A | 2  | AC01 |
| Known Interactor | 801    | CALM1  | DB01373 | Calcium              | A | 2  | AC02 |
| Known Interactor | 5733   | PTGER3 | DB00929 | Misoprostol          | A | 2  | BB01 |
| Known Interactor | 801    | CALM1  | DB01373 | Calcium              | A | 6  | AC08 |
| Known Interactor | 240    | ALOX5  | DB00244 | Mesalazine           | A | 7  | EC02 |
| Known Interactor | 240    | ALOX5  | DB08518 | Sulfasalazine        | A | 7  | EC01 |
| Known Interactor | 240    | ALOX5  | DB01014 | Balsalazide          | A | 7  | EC04 |
| Known Interactor | 801    | CALM1  | DB00836 | Loperamide           | A | 7  | DA03 |
| Known Interactor | 801    | CALM1  | DB00836 | Loperamide           | A | 7  | DA05 |
| Known Interactor | 801    | CALM1  | DB01373 | Calcium              | A | 7  | XA03 |
| Known Interactor | 5742   | PTGS1  | DB00244 | Mesalazine           | A | 7  | EC02 |
| Known Interactor | 5742   | PTGS1  | DB08518 | Sulfasalazine        | A | 7  | EC01 |
| Known Interactor | 5742   | PTGS1  | DB01014 | Balsalazide          | A | 7  | EC04 |
| Known Interactor | 5743   | PTGS2  | DB00244 | Mesalazine           | A | 7  | EC02 |
| Known Interactor | 5743   | PTGS2  | DB08518 | Sulfasalazine        | A | 7  | EC01 |
| Known Interactor | 5743   | PTGS2  | DB01014 | Balsalazide          | A | 7  | EC04 |
| Known Interactor | 2902   | GRIN1  | DB00142 | L-Glutamic Acid      | A | 9  | AB01 |
| Known Interactor | 116443 | GRIN3A | DB00142 | L-Glutamic Acid      | A | 9  | AB01 |
| Known Interactor | 116444 | GRIN3B | DB00142 | L-Glutamic Acid      | A | 9  | AB01 |
| Known Interactor | 19     | ABCA1  | DB01016 | Glyburide            | A | 10 | BB01 |
| Known Interactor | 1080   | CFTR   | DB01016 | Glyburide            | A | 10 | BB01 |
| Known Interactor | 2740   | GLP1R  | DB01276 | Exenatide            | A | 10 | BX04 |
| Known Interactor | 2740   | GLP1R  | DB06655 | Liraglutide          | A | 10 | BX07 |
| Known Interactor | 3480   | IGF1R  | DB01383 | Insulin Regular      | A | 10 | AB01 |
| Known Interactor | 3480   | IGF1R  | DB01383 | Insulin Regular      | A | 10 | AB03 |
| Known Interactor | 3480   | IGF1R  | DB01383 | Insulin Regular      | A | 10 | AB04 |

|                  |        |         |         |                           |   |    |      |
|------------------|--------|---------|---------|---------------------------|---|----|------|
| Known Interactor | 3480   | IGF1R   | DB01383 | Insulin Regular           | A | 10 | AB05 |
| Known Interactor | 3480   | IGF1R   | DB01383 | Insulin Regular           | A | 10 | AC01 |
| Known Interactor | 3480   | IGF1R   | DB01383 | Insulin Regular           | A | 10 | AC03 |
| Known Interactor | 3480   | IGF1R   | DB01383 | Insulin Regular           | A | 10 | AD05 |
| Known Interactor | 3480   | IGF1R   | DB01383 | Insulin Regular           | A | 10 | AE04 |
| Known Interactor | 3480   | IGF1R   | DB01383 | Insulin Regular           | A | 10 | AE05 |
| Known Interactor | 3480   | IGF1R   | DB01310 | Insulin Lispro            | A | 10 | AC04 |
| Known Interactor | 3480   | IGF1R   | DB01310 | Insulin Lispro            | A | 10 | AD04 |
| Known Interactor | 5562   | PRKAA1  | DB00914 | Phenformin                | A | 10 | BA01 |
| Known Interactor | 221120 | ALKBH3  | DB00126 | Vitamin C                 | A | 11 | GA01 |
| Known Interactor | 240    | ALOX5   | DB00163 | Vitamin E                 | A | 11 | HA03 |
| Known Interactor | 801    | CALM1   | DB01373 | Calcium                   | A | 11 | HA31 |
| Known Interactor | 112398 | EGLN2   | DB00126 | Vitamin C                 | A | 11 | GA01 |
| Known Interactor | 5515   | PPP2CA  | DB00163 | Vitamin E                 | A | 11 | HA03 |
| Known Interactor | 5578   | PRKCA   | DB00163 | Vitamin E                 | A | 11 | HA03 |
| Known Interactor | 5579   | PRKCB   | DB00163 | Vitamin E                 | A | 11 | HA03 |
| Known Interactor | 284904 | SEC14L4 | DB00163 | Vitamin E                 | A | 11 | HA03 |
| Known Interactor | 801    | CALM1   | DB01373 | Calcium                   | A | 12 | AA01 |
| Known Interactor | 801    | CALM1   | DB01373 | Calcium                   | A | 12 | AA02 |
| Known Interactor | 801    | CALM1   | DB01373 | Calcium                   | A | 12 | AA03 |
| Known Interactor | 801    | CALM1   | DB01373 | Calcium                   | A | 12 | AA04 |
| Known Interactor | 801    | CALM1   | DB01373 | Calcium                   | A | 12 | AA05 |
| Known Interactor | 801    | CALM1   | DB01373 | Calcium                   | A | 12 | AA06 |
| Known Interactor | 801    | CALM1   | DB01373 | Calcium                   | A | 12 | AA08 |
| Known Interactor | 801    | CALM1   | DB01373 | Calcium                   | A | 12 | AA09 |
| Known Interactor | 801    | CALM1   | DB01373 | Calcium                   | A | 12 | AA10 |
| Known Interactor | 801    | CALM1   | DB01373 | Calcium                   | A | 12 | AA11 |
| Known Interactor | 801    | CALM1   | DB01373 | Calcium                   | A | 12 | AA20 |
| Known Interactor | 801    | CALM1   | DB01373 | Calcium                   | A | 12 | AA30 |
| Known Interactor | 367    | AR      | DB00621 | Oxandrolone               | A | 14 | AA08 |
| Known Interactor | 367    | AR      | DB00984 | Nandrolone phenpropionate | A | 14 | AB01 |
| Known Interactor | 367    | AR      | DB02901 | Dihydrotestosterone       | A | 14 | AA01 |
| Known Interactor | 2099   | ESR1    | DB06593 | Dehydroepiandrosterone    | A | 14 | AA07 |
| Known Interactor | 2902   | GRIN1   | DB06593 | Dehydroepiandrosterone    | A | 14 | AA07 |

|                  |        |        |         |                        |   |    |      |
|------------------|--------|--------|---------|------------------------|---|----|------|
| Known Interactor | 116443 | GRIN3A | DB06593 | Dehydroepiandrosterone | A | 14 | AA07 |
| Known Interactor | 116444 | GRIN3B | DB06593 | Dehydroepiandrosterone | A | 14 | AA07 |
| Known Interactor | 801    | CALM1  | DB01373 | Calcium                | B | 1  | AC08 |
| Known Interactor | 2353   | FOS    | DB08813 | Nadroparin             | B | 1  | AB06 |
| Known Interactor | 4790   | NFKB1  | DB00945 | Acetylsalicylic acid   | B | 1  | AC06 |
| Known Interactor | 4790   | NFKB1  | DB08814 | Triflusal              | B | 1  | AC18 |
| Known Interactor | 5467   | PPARD  | DB00374 | Treprostinil           | B | 1  | AC21 |
| Known Interactor | 5562   | PRKAA1 | DB00945 | Acetylsalicylic acid   | B | 1  | AC06 |
| Known Interactor | 5565   | PRKAB2 | DB00945 | Acetylsalicylic acid   | B | 1  | AC06 |
| Known Interactor | 5742   | PTGS1  | DB00945 | Acetylsalicylic acid   | B | 1  | AC06 |
| Known Interactor | 5742   | PTGS1  | DB08814 | Triflusal              | B | 1  | AC18 |
| Known Interactor | 5743   | PTGS2  | DB00945 | Acetylsalicylic acid   | B | 1  | AC06 |
| Known Interactor | 7157   | TP53   | DB00945 | Acetylsalicylic acid   | B | 1  | AC06 |
| Known Interactor | 801    | CALM1  | DB01373 | Calcium                | B | 2  | BC08 |
| Known Interactor | 116444 | GRIN3B | DB00145 | Glycine                | B | 3  | AA01 |
| Known Interactor | 116444 | GRIN3B | DB00145 | Glycine                | B | 5  | CX03 |
| Known Interactor | 596    | BCL2   | DB01050 | Ibuprofen              | C | 1  | EB16 |
| Known Interactor | 784    | CACNB3 | DB04855 | Dronedarone            | C | 1  | BD07 |
| Known Interactor | 801    | CALM1  | DB01429 | Aprindine              | C | 1  | BB04 |
| Known Interactor | 801    | CALM1  | DB04825 | Prenylamine            | C | 1  | DX02 |
| Known Interactor | 1080   | CFTR   | DB01050 | Ibuprofen              | C | 1  | EB16 |
| Known Interactor | 1956   | EGFR   | DB05291 | Lidocaine              | C | 1  | BB01 |
| Known Interactor | 116443 | GRIN3A | DB00721 | Procaine               | C | 1  | BA02 |
| Known Interactor | 5295   | PIK3R1 | DB01064 | Isoprenaline           | C | 1  | CA02 |
| Known Interactor | 5742   | PTGS1  | DB00328 | Indomethacin           | C | 1  | EB03 |
| Known Interactor | 5742   | PTGS1  | DB01050 | Ibuprofen              | C | 1  | EB16 |
| Known Interactor | 5743   | PTGS2  | DB00328 | Indomethacin           | C | 1  | EB03 |
| Known Interactor | 5743   | PTGS2  | DB01050 | Ibuprofen              | C | 1  | EB16 |
| Known Interactor | 5742   | PTGS1  | DB08225 | Minoxidil              | C | 2  | DC01 |
| Known Interactor | 367    | AR     | DB00421 | Spironolactone         | C | 3  | DA01 |
| Known Interactor | 784    | CACNB3 | DB00421 | Spironolactone         | C | 3  | DA01 |
| Known Interactor | 1080   | CFTR   | DB00887 | Bumetanide             | C | 3  | CA02 |
| Known Interactor | 801    | CALM1  | DB00925 | Phenoxybenzamine       | C | 4  | AX02 |
| Known Interactor | 801    | CALM1  | DB00527 | Cinchocaine            | C | 5  | AD04 |

|                  |        |        |         |                   |   |    |      |
|------------------|--------|--------|---------|-------------------|---|----|------|
| Known Interactor | 801    | CALM1  | DB01373 | Calcium           | C | 5  | BX01 |
| Known Interactor | 1956   | EGFR   | DB05291 | Lidocaine         | C | 5  | AD01 |
| Known Interactor | 116443 | GRIN3A | DB00721 | Procaine          | C | 5  | AD05 |
| Known Interactor | 784    | CACNB3 | DB00393 | Nimodipine        | C | 8  | CA06 |
| Known Interactor | 784    | CACNB3 | DB00661 | Verapamil         | C | 8  | DA01 |
| Known Interactor | 784    | CACNB3 | DB01388 | Mibefradil        | C | 8  | CX01 |
| Known Interactor | 801    | CALM1  | DB00622 | Nicardipine       | C | 8  | CA04 |
| Known Interactor | 801    | CALM1  | DB01023 | Felodipine        | C | 8  | CA02 |
| Known Interactor | 801    | CALM1  | DB01115 | Nifedipine        | C | 8  | CA05 |
| Known Interactor | 801    | CALM1  | DB01244 | Bepridil          | C | 8  | EA02 |
| Known Interactor | 3725   | JUN    | DB01029 | Irbesartan        | C | 9  | CA04 |
| Known Interactor | 19     | ABCA1  | DB01599 | Probucol          | C | 10 | AX02 |
| Known Interactor | 3066   | HDAC2  | DB00227 | Lovastatin        | C | 10 | AA02 |
| Known Interactor | 5467   | PPARD  | DB00159 | Icosapent         | C | 10 | AX06 |
| Known Interactor | 5467   | PPARD  | DB08380 | Bezafibrate       | C | 10 | AB02 |
| Known Interactor | 5742   | PTGS1  | DB00159 | Icosapent         | C | 10 | AX06 |
| Known Interactor | 5743   | PTGS2  | DB00159 | Icosapent         | C | 10 | AX06 |
| Known Interactor | 367    | AR     | DB01026 | Ketoconazole      | D | 1  | AC08 |
| Known Interactor | 1786   | DNMT1  | DB01099 | Flucytosine       | D | 1  | AE21 |
| Known Interactor | 116443 | GRIN3A | DB00898 | Ethanol           | D | 1  | AE06 |
| Known Interactor | 5742   | PTGS1  | DB01398 | Salicylate-sodium | D | 1  | AE12 |
| Known Interactor | 5743   | PTGS2  | DB01398 | Salicylate-sodium | D | 1  | AE12 |
| Known Interactor | 801    | CALM1  | DB01373 | Calcium           | D | 3  | AX04 |
| Known Interactor | 801    | CALM1  | DB00527 | Cinchocaine       | D | 4  | AB02 |
| Known Interactor | 801    | CALM1  | DB01069 | Promethazine      | D | 4  | AA10 |
| Known Interactor | 1956   | EGFR   | DB05291 | Lidocaine         | D | 4  | AB01 |
| Known Interactor | 116443 | GRIN3A | DB00721 | Procaine          | D | 4  | AB03 |
| Known Interactor | 5578   | PRKCA  | DB05013 | Ingenol Mebutate  | D | 6  | BX02 |
| Known Interactor | 5580   | PRKCD  | DB05013 | Ingenol Mebutate  | D | 6  | BX02 |
| Known Interactor | 116443 | GRIN3A | DB00898 | Ethanol           | D | 8  | AX08 |
| Known Interactor | 5295   | PIK3R1 | DB01064 | Isoprenaline      | D | 8  | AX05 |
| Known Interactor | 240    | ALOX5  | DB00586 | Diclofenac        | D | 11 | AX18 |
| Known Interactor | 801    | CALM1  | DB01373 | Calcium           | D | 11 | AX03 |
| Known Interactor | 2932   | GSK3B  | DB01356 | Lithium           | D | 11 | AX04 |

|                  |        |        |         |                      |   |    |      |
|------------------|--------|--------|---------|----------------------|---|----|------|
| Known Interactor | 2475   | MTOR   | DB00337 | Pimecrolimus         | D | 11 | AH02 |
| Known Interactor | 5742   | PTGS1  | DB08225 | Minoxidil            | D | 11 | AX01 |
| Known Interactor | 5742   | PTGS1  | DB00586 | Diclofenac           | D | 11 | AX18 |
| Known Interactor | 5742   | PTGS1  | DB00936 | Salicylic acid       | D | 11 | AC30 |
| Known Interactor | 5743   | PTGS2  | DB00586 | Diclofenac           | D | 11 | AX18 |
| Known Interactor | 5743   | PTGS2  | DB00936 | Salicylic acid       | D | 11 | AC30 |
| Known Interactor | 221120 | ALKBH3 | DB00126 | Vitamin C            | G | 1  | AD03 |
| Known Interactor | 367    | AR     | DB01026 | Ketoconazole         | G | 1  | AF11 |
| Known Interactor | 112398 | EGLN2  | DB00126 | Vitamin C            | G | 1  | AD03 |
| Known Interactor | 596    | BCL2   | DB01050 | Ibuprofen            | G | 2  | CC01 |
| Known Interactor | 1080   | CFTR   | DB01050 | Ibuprofen            | G | 2  | CC01 |
| Known Interactor | 5733   | PTGER3 | DB00917 | Dinoprostone         | G | 2  | AD02 |
| Known Interactor | 5742   | PTGS1  | DB00788 | Naproxen             | G | 2  | CC02 |
| Known Interactor | 5742   | PTGS1  | DB01050 | Ibuprofen            | G | 2  | CC01 |
| Known Interactor | 5743   | PTGS2  | DB00788 | Naproxen             | G | 2  | CC02 |
| Known Interactor | 5743   | PTGS2  | DB01050 | Ibuprofen            | G | 2  | CC01 |
| Known Interactor | 367    | AR     | DB00506 | Levonorgestrel       | G | 3  | AC03 |
| Known Interactor | 367    | AR     | DB00506 | Levonorgestrel       | G | 3  | AD01 |
| Known Interactor | 367    | AR     | DB00624 | Testosterone         | G | 3  | BA02 |
| Known Interactor | 367    | AR     | DB00624 | Testosterone         | G | 3  | BA03 |
| Known Interactor | 367    | AR     | DB00624 | Testosterone         | G | 3  | EK01 |
| Known Interactor | 367    | AR     | DB01185 | Fluoxymesterone      | G | 3  | BA01 |
| Known Interactor | 367    | AR     | DB01406 | Danazol              | G | 3  | XA01 |
| Known Interactor | 367    | AR     | DB02901 | Dihydrotestosterone  | G | 3  | BB02 |
| Known Interactor | 367    | AR     | DB04839 | Cyproterone acetate  | G | 3  | HA01 |
| Known Interactor | 2099   | ESR1   | DB00255 | Diethylstilbestrol   | G | 3  | CB02 |
| Known Interactor | 2099   | ESR1   | DB00255 | Diethylstilbestrol   | G | 3  | CC05 |
| Known Interactor | 2099   | ESR1   | DB00269 | Chlorotrianisene     | G | 3  | CA06 |
| Known Interactor | 2099   | ESR1   | DB00286 | Conjugated Estrogens | G | 3  | CA57 |
| Known Interactor | 2099   | ESR1   | DB00294 | Etonogestrel         | G | 3  | AC08 |
| Known Interactor | 2099   | ESR1   | DB00304 | Desogestrel          | G | 3  | AC09 |
| Known Interactor | 2099   | ESR1   | DB00506 | Levonorgestrel       | G | 3  | AC03 |
| Known Interactor | 2099   | ESR1   | DB00506 | Levonorgestrel       | G | 3  | AD01 |
| Known Interactor | 2099   | ESR1   | DB00396 | Progesterone         | G | 3  | AC06 |



|                  |        |        |         |                      |   |   |      |
|------------------|--------|--------|---------|----------------------|---|---|------|
| Known Interactor | 2099   | ESR1   | DB00396 | Progesterone         | G | 3 | DA02 |
| Known Interactor | 2099   | ESR1   | DB00396 | Progesterone         | G | 3 | DA03 |
| Known Interactor | 2099   | ESR1   | DB00396 | Progesterone         | G | 3 | DA04 |
| Known Interactor | 2099   | ESR1   | DB00481 | Raloxifene           | G | 3 | XC01 |
| Known Interactor | 2099   | ESR1   | DB00655 | Estrone              | G | 3 | CA07 |
| Known Interactor | 2099   | ESR1   | DB00655 | Estrone              | G | 3 | CC04 |
| Known Interactor | 2099   | ESR1   | DB00783 | Estradiol            | G | 3 | CA01 |
| Known Interactor | 2099   | ESR1   | DB00783 | Estradiol            | G | 3 | CA03 |
| Known Interactor | 2099   | ESR1   | DB00882 | Clomifene            | G | 3 | GB02 |
| Known Interactor | 2099   | ESR1   | DB00890 | Dienestrol           | G | 3 | CB01 |
| Known Interactor | 2099   | ESR1   | DB00890 | Dienestrol           | G | 3 | CC02 |
| Known Interactor | 2099   | ESR1   | DB00957 | Norgestimate         | G | 3 | AA11 |
| Known Interactor | 2099   | ESR1   | DB01185 | Fluoxymesterone      | G | 3 | BA01 |
| Known Interactor | 2099   | ESR1   | DB01406 | Danazol              | G | 3 | XA01 |
| Known Interactor | 2099   | ESR1   | DB01431 | Allylestrenol        | G | 3 | DC01 |
| Known Interactor | 2099   | ESR1   | DB05375 | Estriol              | G | 3 | CA04 |
| Known Interactor | 2099   | ESR1   | DB05375 | Estriol              | G | 3 | CC06 |
| Known Interactor | 3480   | IGF1R  | DB01277 | Mecasermin           | H | 1 | AC03 |
| Known Interactor | 367    | AR     | DB02478 | Fludrocortisone      | H | 2 | AA02 |
| Known Interactor | 2099   | ESR1   | DB01108 | Trilostane           | H | 2 | CA01 |
| Known Interactor | 2740   | GLP1R  | DB00040 | Glucagon recombinant | H | 4 | AA01 |
| Known Interactor | 240    | ALOX5  | DB01017 | Minocycline          | J | 1 | AA08 |
| Known Interactor | 116443 | GRIN3A | DB00721 | Procaine             | J | 1 | CE09 |
| Known Interactor | 367    | AR     | DB01026 | Ketoconazole         | J | 2 | AB02 |
| Known Interactor | 1786   | DNMT1  | DB01099 | Flucytosine          | J | 2 | AX01 |
| Known Interactor | 240    | ALOX5  | DB00233 | Aminosalicylic Acid  | J | 4 | AA01 |
| Known Interactor | 801    | CALM1  | DB01373 | Calcium              | J | 4 | AA03 |
| Known Interactor | 5743   | PTGS2  | DB00233 | Aminosalicylic Acid  | J | 4 | AA01 |
| Known Interactor | 7015   | TERT   | DB00495 | Zidovudine           | J | 5 | AF01 |
| Known Interactor | 25     | ABL1   | DB03261 | Imatinib             | L | 1 | XE01 |
| Known Interactor | 25     | ABL1   | DB01254 | Dasatinib            | L | 1 | XE06 |
| Known Interactor | 25     | ABL1   | DB04868 | Nilotinib            | L | 1 | XE08 |
| Known Interactor | 25     | ABL1   | DB06616 | Bosutinib            | L | 1 | XE14 |
| Known Interactor | 25     | ABL1   | DB08896 | Regorafenib          | L | 1 | XE21 |

|                  |      |       |         |                    |   |   |      |
|------------------|------|-------|---------|--------------------|---|---|------|
| Known Interactor | 207  | AKT1  | DB01169 | Arsenic trioxide   | L | 1 | XX27 |
| Known Interactor | 240  | ALOX5 | DB00179 | Masoprocol         | L | 1 | XX10 |
| Known Interactor | 596  | BCL2  | DB05927 | Paclitaxel         | L | 1 | CD01 |
| Known Interactor | 596  | BCL2  | DB01248 | Docetaxel          | L | 1 | CD02 |
| Known Interactor | 595  | CCND1 | DB01169 | Arsenic trioxide   | L | 1 | XX27 |
| Known Interactor | 1956 | EGFR  | DB00002 | Cetuximab          | L | 1 | XC06 |
| Known Interactor | 1956 | EGFR  | DB00072 | Trastuzumab        | L | 1 | XC03 |
| Known Interactor | 1956 | EGFR  | DB07998 | Gefitinib          | L | 1 | XE02 |
| Known Interactor | 1956 | EGFR  | DB00530 | Erlotinib          | L | 1 | XE03 |
| Known Interactor | 1956 | EGFR  | DB02584 | Lapatinib          | L | 1 | XE07 |
| Known Interactor | 1956 | EGFR  | DB01269 | Panitumumab        | L | 1 | XC08 |
| Known Interactor | 1956 | EGFR  | DB05294 | Vandetanib         | L | 1 | XE12 |
| Known Interactor | 1956 | EGFR  | DB08916 | Afatinib           | L | 1 | XE13 |
| Known Interactor | 2099 | ESR1  | DB01196 | Estramustine       | L | 1 | XX11 |
| Known Interactor | 2534 | FYN   | DB01254 | Dasatinib          | L | 1 | XE06 |
| Known Interactor | 3065 | HDAC1 | DB02546 | Vorinostat         | L | 1 | XX38 |
| Known Interactor | 3066 | HDAC2 | DB02546 | Vorinostat         | L | 1 | XX38 |
| Known Interactor | 3717 | JAK2  | DB08877 | Ruxolitinib        | L | 1 | XE18 |
| Known Interactor | 3725 | JUN   | DB00570 | Vinblastine        | L | 1 | CA01 |
| Known Interactor | 3725 | JUN   | DB01169 | Arsenic trioxide   | L | 1 | XX27 |
| Known Interactor | 5595 | MAPK3 | DB01169 | Arsenic trioxide   | L | 1 | XX27 |
| Known Interactor | 2475 | MTOR  | DB01590 | Everolimus         | L | 1 | XE10 |
| Known Interactor | 2475 | MTOR  | DB06287 | Temsirolimus       | L | 1 | XE09 |
| Known Interactor | 5170 | PDPK1 | DB00482 | Celecoxib          | L | 1 | XX33 |
| Known Interactor | 5423 | POLB  | DB00987 | Cytarabine         | L | 1 | BC01 |
| Known Interactor | 5743 | PTGS2 | DB00482 | Celecoxib          | L | 1 | XX33 |
| Known Interactor | 367  | AR    | DB00499 | Flutamide          | L | 2 | BB01 |
| Known Interactor | 367  | AR    | DB00665 | Nilutamide         | L | 2 | BB02 |
| Known Interactor | 367  | AR    | DB06284 | Bicalutamide       | L | 2 | BB03 |
| Known Interactor | 2099 | ESR1  | DB00255 | Diethylstilbestrol | L | 2 | AA01 |
| Known Interactor | 2099 | ESR1  | DB00396 | Progesterone       | L | 2 | AB02 |
| Known Interactor | 2099 | ESR1  | DB00539 | Toremifene         | L | 2 | BA02 |
| Known Interactor | 2099 | ESR1  | DB00675 | Tamoxifen          | L | 2 | BA01 |
| Known Interactor | 2099 | ESR1  | DB00783 | Estradiol          | L | 2 | AA02 |

|                  |      |        |         |                   |   |   |      |
|------------------|------|--------|---------|-------------------|---|---|------|
| Known Interactor | 2099 | ESR1   | DB00783 | Estradiol         | L | 2 | AA03 |
| Known Interactor | 2099 | ESR1   | DB00947 | Fulvestrant       | L | 2 | BA03 |
| Known Interactor | 5578 | PRKCA  | DB00675 | Tamoxifen         | L | 2 | BA01 |
| Known Interactor | 5579 | PRKCB  | DB00675 | Tamoxifen         | L | 2 | BA01 |
| Known Interactor | 5580 | PRKCD  | DB00675 | Tamoxifen         | L | 2 | BA01 |
| Known Interactor | 5581 | PRKCE  | DB00675 | Tamoxifen         | L | 2 | BA01 |
| Known Interactor | 1439 | CSF2RB | DB00020 | Sargramostim      | L | 3 | AA09 |
| Known Interactor | 596  | BCL2   | DB05297 | DHA-paclitaxel    | L | 4 | AA26 |
| Known Interactor | 3717 | JAK2   | DB08895 | Tofacitinib       | L | 4 | AA29 |
| Known Interactor | 3718 | JAK3   | DB08895 | Tofacitinib       | L | 4 | AA29 |
| Known Interactor | 2475 | MTOR   | DB02439 | Sirolimus         | L | 4 | AA10 |
| Known Interactor | 2475 | MTOR   | DB01590 | Everolimus        | L | 4 | AA18 |
| Known Interactor | 4790 | NFKB1  | DB01041 | Thalidomide       | L | 4 | AX02 |
| Known Interactor | 5478 | PPIA   | DB00091 | Cyclosporine      | L | 4 | AD01 |
| Known Interactor | 5743 | PTGS2  | DB00480 | Lenalidomide      | L | 4 | AX04 |
| Known Interactor | 5743 | PTGS2  | DB01041 | Thalidomide       | L | 4 | AX02 |
| Known Interactor | 2185 | PTK2B  | DB01097 | Leflunomide       | L | 4 | AA13 |
| Known Interactor | 240  | ALOX5  | DB00586 | Diclofenac        | M | 1 | AB05 |
| Known Interactor | 240  | ALOX5  | DB00939 | Meclofenamic acid | M | 1 | AG04 |
| Known Interactor | 367  | AR     | DB02266 | Flufenamic Acid   | M | 1 | AG03 |
| Known Interactor | 596  | BCL2   | DB01050 | Ibuprofen         | M | 1 | AE01 |
| Known Interactor | 596  | BCL2   | DB01050 | Ibuprofen         | M | 1 | AE14 |
| Known Interactor | 1080 | CFTR   | DB01050 | Ibuprofen         | M | 1 | AE01 |
| Known Interactor | 1080 | CFTR   | DB01050 | Ibuprofen         | M | 1 | AE14 |
| Known Interactor | 5595 | MAPK3  | DB00605 | Sulindac          | M | 1 | AB02 |
| Known Interactor | 5170 | PDPK1  | DB00482 | Celecoxib         | M | 1 | AH01 |
| Known Interactor | 5467 | PPARD  | DB00605 | Sulindac          | M | 1 | AB02 |
| Known Interactor | 5742 | PTGS1  | DB00328 | Indomethacin      | M | 1 | AB01 |
| Known Interactor | 5742 | PTGS1  | DB00461 | Nabumetone        | M | 1 | AX01 |
| Known Interactor | 5742 | PTGS1  | DB00465 | Ketorolac         | M | 1 | AB15 |
| Known Interactor | 5742 | PTGS1  | DB00469 | Tenoxicam         | M | 1 | AC02 |
| Known Interactor | 5742 | PTGS1  | DB00500 | Tolmetin          | M | 1 | AB03 |
| Known Interactor | 5742 | PTGS1  | DB00554 | Piroxicam         | M | 1 | AC01 |
| Known Interactor | 5742 | PTGS1  | DB00573 | Fenoprofen        | M | 1 | AE04 |

|                  |      |       |         |                   |   |   |      |
|------------------|------|-------|---------|-------------------|---|---|------|
| Known Interactor | 5742 | PTGS1 | DB00586 | Diclofenac        | M | 1 | AB05 |
| Known Interactor | 5742 | PTGS1 | DB00605 | Sulindac          | M | 1 | AB02 |
| Known Interactor | 5742 | PTGS1 | DB00712 | Flurbiprofen      | M | 1 | AE09 |
| Known Interactor | 5742 | PTGS1 | DB00749 | Etodolac          | M | 1 | AB08 |
| Known Interactor | 5742 | PTGS1 | DB00784 | Mefenamic acid    | M | 1 | AG01 |
| Known Interactor | 5742 | PTGS1 | DB00788 | Naproxen          | M | 1 | AE02 |
| Known Interactor | 5742 | PTGS1 | DB08343 | Phenylbutazone    | M | 1 | AA01 |
| Known Interactor | 5742 | PTGS1 | DB00814 | Meloxicam         | M | 1 | AC06 |
| Known Interactor | 5742 | PTGS1 | DB00870 | Suprofen          | M | 1 | AE07 |
| Known Interactor | 5742 | PTGS1 | DB00939 | Meclofenamic acid | M | 1 | AG04 |
| Known Interactor | 5742 | PTGS1 | DB00991 | Oxaprozin         | M | 1 | AE12 |
| Known Interactor | 5742 | PTGS1 | DB05823 | Ketoprofen        | M | 1 | AE03 |
| Known Interactor | 5742 | PTGS1 | DB05823 | Ketoprofen        | M | 1 | AE17 |
| Known Interactor | 5742 | PTGS1 | DB01050 | Ibuprofen         | M | 1 | AE01 |
| Known Interactor | 5742 | PTGS1 | DB01050 | Ibuprofen         | M | 1 | AE14 |
| Known Interactor | 5742 | PTGS1 | DB01283 | Lumiracoxib       | M | 1 | AH06 |
| Known Interactor | 5742 | PTGS1 | DB01600 | Tiaprofenic acid  | M | 1 | AE11 |
| Known Interactor | 5742 | PTGS1 | DB02266 | Flufenamic Acid   | M | 1 | AG03 |
| Known Interactor | 5742 | PTGS1 | DB04552 | Niflumic Acid     | M | 1 | AX02 |
| Known Interactor | 5742 | PTGS1 | DB06725 | Lornoxicam        | M | 1 | AC05 |
| Known Interactor | 5743 | PTGS2 | DB00328 | Indomethacin      | M | 1 | AB01 |
| Known Interactor | 5743 | PTGS2 | DB00461 | Nabumetone        | M | 1 | AX01 |
| Known Interactor | 5743 | PTGS2 | DB00465 | Ketorolac         | M | 1 | AB15 |
| Known Interactor | 5743 | PTGS2 | DB00469 | Tenoxicam         | M | 1 | AC02 |
| Known Interactor | 5743 | PTGS2 | DB00482 | Celecoxib         | M | 1 | AH01 |
| Known Interactor | 5743 | PTGS2 | DB00500 | Tolmetin          | M | 1 | AB03 |
| Known Interactor | 5743 | PTGS2 | DB00533 | Rofecoxib         | M | 1 | AH02 |
| Known Interactor | 5743 | PTGS2 | DB00554 | Piroxicam         | M | 1 | AC01 |
| Known Interactor | 5743 | PTGS2 | DB00573 | Fenoprofen        | M | 1 | AE04 |
| Known Interactor | 5743 | PTGS2 | DB07576 | Valdecoxib        | M | 1 | AH03 |
| Known Interactor | 5743 | PTGS2 | DB00586 | Diclofenac        | M | 1 | AB05 |
| Known Interactor | 5743 | PTGS2 | DB00605 | Sulindac          | M | 1 | AB02 |
| Known Interactor | 5743 | PTGS2 | DB00712 | Flurbiprofen      | M | 1 | AE09 |
| Known Interactor | 5743 | PTGS2 | DB00749 | Etodolac          | M | 1 | AB08 |

|                  |      |       |         |                   |   |   |      |
|------------------|------|-------|---------|-------------------|---|---|------|
| Known Interactor | 5743 | PTGS2 | DB00784 | Mefenamic acid    | M | 1 | AG01 |
| Known Interactor | 5743 | PTGS2 | DB00788 | Naproxen          | M | 1 | AE02 |
| Known Interactor | 5743 | PTGS2 | DB08343 | Phenylbutazone    | M | 1 | AA01 |
| Known Interactor | 5743 | PTGS2 | DB00814 | Meloxicam         | M | 1 | AC06 |
| Known Interactor | 5743 | PTGS2 | DB00870 | Suprofen          | M | 1 | AE07 |
| Known Interactor | 5743 | PTGS2 | DB00939 | Meclofenamic acid | M | 1 | AG04 |
| Known Interactor | 5743 | PTGS2 | DB00991 | Oxaprozin         | M | 1 | AE12 |
| Known Interactor | 5743 | PTGS2 | DB05823 | Ketoprofen        | M | 1 | AE03 |
| Known Interactor | 5743 | PTGS2 | DB05823 | Ketoprofen        | M | 1 | AE17 |
| Known Interactor | 5743 | PTGS2 | DB01050 | Ibuprofen         | M | 1 | AE01 |
| Known Interactor | 5743 | PTGS2 | DB01050 | Ibuprofen         | M | 1 | AE14 |
| Known Interactor | 5743 | PTGS2 | DB01283 | Lumiracoxib       | M | 1 | AH06 |
| Known Interactor | 5743 | PTGS2 | DB01600 | Tiaprofenic acid  | M | 1 | AE11 |
| Known Interactor | 5743 | PTGS2 | DB07166 | Etoricoxib        | M | 1 | AH05 |
| Known Interactor | 5743 | PTGS2 | DB02266 | Flufenamic Acid   | M | 1 | AG03 |
| Known Interactor | 5743 | PTGS2 | DB04552 | Niflumic Acid     | M | 1 | AX02 |
| Known Interactor | 5743 | PTGS2 | DB04743 | Nimesulide        | M | 1 | AX17 |
| Known Interactor | 5743 | PTGS2 | DB06725 | Lornoxicam        | M | 1 | AC05 |
| Known Interactor | 240  | ALOX5 | DB00586 | Diclofenac        | M | 2 | AA15 |
| Known Interactor | 240  | ALOX5 | DB00939 | Meclofenamic acid | M | 2 | AA18 |
| Known Interactor | 596  | BCL2  | DB01050 | Ibuprofen         | M | 2 | AA13 |
| Known Interactor | 1080 | CFTR  | DB01050 | Ibuprofen         | M | 2 | AA13 |
| Known Interactor | 5742 | PTGS1 | DB00500 | Tolmetin          | M | 2 | AA21 |
| Known Interactor | 5742 | PTGS1 | DB00554 | Piroxicam         | M | 2 | AA07 |
| Known Interactor | 5742 | PTGS1 | DB00586 | Diclofenac        | M | 2 | AA15 |
| Known Interactor | 5742 | PTGS1 | DB00712 | Flurbiprofen      | M | 2 | AA19 |
| Known Interactor | 5742 | PTGS1 | DB00788 | Naproxen          | M | 2 | AA12 |
| Known Interactor | 5742 | PTGS1 | DB08343 | Phenylbutazone    | M | 2 | AA01 |
| Known Interactor | 5742 | PTGS1 | DB00939 | Meclofenamic acid | M | 2 | AA18 |
| Known Interactor | 5742 | PTGS1 | DB05823 | Ketoprofen        | M | 2 | AA10 |
| Known Interactor | 5742 | PTGS1 | DB01050 | Ibuprofen         | M | 2 | AA13 |
| Known Interactor | 5742 | PTGS1 | DB04552 | Niflumic Acid     | M | 2 | AA17 |
| Known Interactor | 5743 | PTGS2 | DB00500 | Tolmetin          | M | 2 | AA21 |
| Known Interactor | 5743 | PTGS2 | DB00554 | Piroxicam         | M | 2 | AA07 |

|                  |        |        |         |                      |   |   |      |
|------------------|--------|--------|---------|----------------------|---|---|------|
| Known Interactor | 5743   | PTGS2  | DB00586 | Diclofenac           | M | 2 | AA15 |
| Known Interactor | 5743   | PTGS2  | DB00712 | Flurbiprofen         | M | 2 | AA19 |
| Known Interactor | 5743   | PTGS2  | DB00788 | Naproxen             | M | 2 | AA12 |
| Known Interactor | 5743   | PTGS2  | DB08343 | Phenylbutazone       | M | 2 | AA01 |
| Known Interactor | 5743   | PTGS2  | DB00939 | Meclofenamic acid    | M | 2 | AA18 |
| Known Interactor | 5743   | PTGS2  | DB05823 | Ketoprofen           | M | 2 | AA10 |
| Known Interactor | 5743   | PTGS2  | DB01050 | Ibuprofen            | M | 2 | AA13 |
| Known Interactor | 5743   | PTGS2  | DB04552 | Niflumic Acid        | M | 2 | AA17 |
| Known Interactor | 5743   | PTGS2  | DB04743 | Nimesulide           | M | 2 | AA26 |
| Known Interactor | 2902   | GRIN1  | DB01173 | Orphenadrine         | M | 3 | BC01 |
| Known Interactor | 116443 | GRIN3A | DB01173 | Orphenadrine         | M | 3 | BC01 |
| Known Interactor | 116444 | GRIN3B | DB01173 | Orphenadrine         | M | 3 | BC01 |
| Known Interactor | 5775   | PTPN4  | DB00630 | Alendronate          | M | 5 | BA04 |
| Known Interactor | 801    | CALM1  | DB00527 | Cinchocaine          | N | 1 | BB06 |
| Known Interactor | 801    | CALM1  | DB00753 | Isoflurane           | N | 1 | AB06 |
| Known Interactor | 1956   | EGFR   | DB05291 | Lidocaine            | N | 1 | BB02 |
| Known Interactor | 116443 | GRIN3A | DB00721 | Procaine             | N | 1 | BA02 |
| Known Interactor | 116443 | GRIN3A | DB00721 | Procaine             | N | 1 | BA04 |
| Known Interactor | 116443 | GRIN3A | DB02330 | Halothane            | N | 1 | AB01 |
| Known Interactor | 116443 | GRIN3A | DB01221 | Ketamine             | N | 1 | AX03 |
| Known Interactor | 116443 | GRIN3A | DB01221 | Ketamine             | N | 1 | AX14 |
| Known Interactor | 116444 | GRIN3B | DB02330 | Halothane            | N | 1 | AB01 |
| Known Interactor | 801    | CALM1  | DB01373 | Calcium              | N | 2 | BA15 |
| Known Interactor | 2902   | GRIN1  | DB00454 | Pethidine            | N | 2 | AB02 |
| Known Interactor | 2902   | GRIN1  | DB06738 | Ketobemidone         | N | 2 | AB01 |
| Known Interactor | 116443 | GRIN3A | DB00193 | Tramadol             | N | 2 | AX02 |
| Known Interactor | 116443 | GRIN3A | DB00333 | Methadone            | N | 2 | AC52 |
| Known Interactor | 116443 | GRIN3A | DB06738 | Ketobemidone         | N | 2 | AB01 |
| Known Interactor | 116444 | GRIN3B | DB06738 | Ketobemidone         | N | 2 | AB01 |
| Known Interactor | 4790   | NFKB1  | DB00945 | Acetylsalicylic acid | N | 2 | BA01 |
| Known Interactor | 27115  | PDE7B  | DB00201 | Caffeine             | N | 2 | BE01 |
| Known Interactor | 5562   | PRKAA1 | DB00945 | Acetylsalicylic acid | N | 2 | BA01 |
| Known Interactor | 5565   | PRKAB2 | DB00945 | Acetylsalicylic acid | N | 2 | BA01 |
| Known Interactor | 5742   | PTGS1  | DB06895 | Diflunisal           | N | 2 | BA11 |

|                  |        |        |         |                      |   |   |      |
|------------------|--------|--------|---------|----------------------|---|---|------|
| Known Interactor | 5742   | PTGS1  | DB00936 | Salicylic acid       | N | 2 | BA04 |
| Known Interactor | 5742   | PTGS1  | DB00945 | Acetylsalicylic acid | N | 2 | BA01 |
| Known Interactor | 5742   | PTGS1  | DB01399 | Salsalate            | N | 2 | BA06 |
| Known Interactor | 5742   | PTGS1  | DB01435 | Antipyrine           | N | 2 | BB01 |
| Known Interactor | 5742   | PTGS1  | DB08243 | Phenacetin           | N | 2 | BE03 |
| Known Interactor | 5743   | PTGS2  | DB06895 | Diflunisal           | N | 2 | BA11 |
| Known Interactor | 5743   | PTGS2  | DB00936 | Salicylic acid       | N | 2 | BA04 |
| Known Interactor | 5743   | PTGS2  | DB00945 | Acetylsalicylic acid | N | 2 | BA01 |
| Known Interactor | 5743   | PTGS2  | DB01399 | Salsalate            | N | 2 | BA06 |
| Known Interactor | 5743   | PTGS2  | DB01435 | Antipyrine           | N | 2 | BB01 |
| Known Interactor | 7157   | TP53   | DB00945 | Acetylsalicylic acid | N | 2 | BA01 |
| Known Interactor | 2902   | GRIN1  | DB00996 | Gabapentin           | N | 3 | AX12 |
| Known Interactor | 2902   | GRIN1  | DB01174 | Phenobarbital        | N | 3 | AA02 |
| Known Interactor | 116443 | GRIN3A | DB00949 | Felbamate            | N | 3 | AX10 |
| Known Interactor | 116443 | GRIN3A | DB00996 | Gabapentin           | N | 3 | AX12 |
| Known Interactor | 116443 | GRIN3A | DB01174 | Phenobarbital        | N | 3 | AA02 |
| Known Interactor | 116444 | GRIN3B | DB00996 | Gabapentin           | N | 3 | AX12 |
| Known Interactor | 116444 | GRIN3B | DB01174 | Phenobarbital        | N | 3 | AA02 |
| Known Interactor | 3066   | HDAC2  | DB00510 | Valproic Acid        | N | 3 | AG01 |
| Known Interactor | 596    | BCL2   | DB01367 | Rasagiline           | N | 4 | BD02 |
| Known Interactor | 2902   | GRIN1  | DB01173 | Orphenadrine         | N | 4 | AB02 |
| Known Interactor | 116443 | GRIN3A | DB00392 | Ethopropazine        | N | 4 | AA05 |
| Known Interactor | 116443 | GRIN3A | DB00915 | Amantadine           | N | 4 | BB01 |
| Known Interactor | 116443 | GRIN3A | DB01173 | Orphenadrine         | N | 4 | AB02 |
| Known Interactor | 116444 | GRIN3B | DB01173 | Orphenadrine         | N | 4 | AB02 |
| Known Interactor | 801    | CALM1  | DB00623 | Fluphenazine         | N | 5 | AB02 |
| Known Interactor | 801    | CALM1  | DB08616 | Trifluoperazine      | N | 5 | AB06 |
| Known Interactor | 801    | CALM1  | DB00850 | Perphenazine         | N | 5 | AB03 |
| Known Interactor | 801    | CALM1  | DB08189 | Melatonin            | N | 5 | CH01 |
| Known Interactor | 801    | CALM1  | DB01100 | Pimozide             | N | 5 | AG02 |
| Known Interactor | 2099   | ESR1   | DB08189 | Melatonin            | N | 5 | CH01 |
| Known Interactor | 2902   | GRIN1  | DB00312 | Pentobarbital        | N | 5 | CA01 |
| Known Interactor | 2902   | GRIN1  | DB00418 | Secobarbital         | N | 5 | CA06 |
| Known Interactor | 116443 | GRIN3A | DB00312 | Pentobarbital        | N | 5 | CA01 |

|                  |        |        |         |                    |   |   |      |
|------------------|--------|--------|---------|--------------------|---|---|------|
| Known Interactor | 116443 | GRIN3A | DB00418 | Secobarbital       | N | 5 | CA06 |
| Known Interactor | 116444 | GRIN3B | DB00312 | Pentobarbital      | N | 5 | CA01 |
| Known Interactor | 116444 | GRIN3B | DB00418 | Secobarbital       | N | 5 | CA06 |
| Known Interactor | 2932   | GSK3B  | DB01356 | Lithium            | N | 5 | AN01 |
| Known Interactor | 2902   | GRIN1  | DB00289 | Atomoxetine        | N | 6 | BA09 |
| Known Interactor | 2902   | GRIN1  | DB01043 | Memantine          | N | 6 | DX01 |
| Known Interactor | 2902   | GRIN1  | DB04896 | Milnacipran        | N | 6 | AX17 |
| Known Interactor | 116443 | GRIN3A | DB00289 | Atomoxetine        | N | 6 | BA09 |
| Known Interactor | 116443 | GRIN3A | DB01043 | Memantine          | N | 6 | DX01 |
| Known Interactor | 116443 | GRIN3A | DB04896 | Milnacipran        | N | 6 | AX17 |
| Known Interactor | 116444 | GRIN3B | DB00289 | Atomoxetine        | N | 6 | BA09 |
| Known Interactor | 116444 | GRIN3B | DB04896 | Milnacipran        | N | 6 | AX17 |
| Known Interactor | 27115  | PDE7B  | DB00201 | Caffeine           | N | 6 | BC01 |
| Known Interactor | 801    | CALM1  | DB01373 | Calcium            | N | 7 | BB02 |
| Known Interactor | 801    | CALM1  | DB04841 | Flunarizine        | N | 7 | CA03 |
| Known Interactor | 2902   | GRIN1  | DB00659 | Acamprosate        | N | 7 | BB03 |
| Known Interactor | 116443 | GRIN3A | DB00333 | Methadone          | N | 7 | BC02 |
| Known Interactor | 116443 | GRIN3A | DB00659 | Acamprosate        | N | 7 | BB03 |
| Known Interactor | 116444 | GRIN3B | DB00659 | Acamprosate        | N | 7 | BB03 |
| Known Interactor | 240    | ALOX5  | DB00711 | Diethylcarbamazine | P | 2 | CB02 |
| Known Interactor | 5742   | PTGS1  | DB00711 | Diethylcarbamazine | P | 2 | CB02 |
| Known Interactor | 801    | CALM1  | DB01373 | Calcium            | R | 1 | AX01 |
| Known Interactor | 2353   | FOS    | DB00852 | Pseudoephedrine    | R | 1 | BA02 |
| Known Interactor | 3725   | JUN    | DB00852 | Pseudoephedrine    | R | 1 | BA02 |
| Known Interactor | 6271   | S100A1 | DB00768 | Olopatadine        | R | 1 | AC08 |
| Known Interactor | 1956   | EGFR   | DB05291 | Lidocaine          | R | 2 | AD02 |
| Known Interactor | 240    | ALOX5  | DB00471 | Montelukast        | R | 3 | DC03 |
| Known Interactor | 3066   | HDAC2  | DB00277 | Theophylline       | R | 3 | DA04 |
| Known Interactor | 3066   | HDAC2  | DB00277 | Theophylline       | R | 3 | DA05 |
| Known Interactor | 4790   | NFKB1  | DB01411 | Pranlukast         | R | 3 | DC02 |
| Known Interactor | 27115  | PDE7B  | DB00651 | Dyphylline         | R | 3 | DA01 |
| Known Interactor | 116443 | GRIN3A | DB00333 | Methadone          | R | 5 | DA06 |
| Known Interactor | 116443 | GRIN3A | DB00514 | Dextromethorphan   | R | 5 | DA09 |
| Known Interactor | 801    | CALM1  | DB01069 | Promethazine       | R | 6 | AD02 |



|                  |        |        |         |                           |   |   |      |
|------------------|--------|--------|---------|---------------------------|---|---|------|
| Known Interactor | 801    | CALM1  | DB01069 | Promethazine              | R | 6 | AD05 |
| Known Interactor | 27115  | PDE7B  | DB00920 | Ketotifen                 | R | 6 | AX17 |
| Known Interactor | 1080   | CFTR   | DB08820 | Ivacaftor                 | R | 7 | AX02 |
| Known Interactor | 221120 | ALKBH3 | DB00126 | Vitamin C                 | S | 1 | XA15 |
| Known Interactor | 240    | ALOX5  | DB00586 | Diclofenac                | S | 1 | BC03 |
| Known Interactor | 358    | AQP1   | DB00819 | Acetazolamide             | S | 1 | EC01 |
| Known Interactor | 367    | AR     | DB00984 | Nandrolone phenpropionate | S | 1 | XA11 |
| Known Interactor | 801    | CALM1  | DB00527 | Cinchocaine               | S | 1 | HA06 |
| Known Interactor | 1956   | EGFR   | DB05291 | Lidocaine                 | S | 1 | HA07 |
| Known Interactor | 112398 | EGLN2  | DB00126 | Vitamin C                 | S | 1 | XA15 |
| Known Interactor | 116443 | GRIN3A | DB00721 | Procaine                  | S | 1 | HA02 |
| Known Interactor | 116443 | GRIN3A | DB00721 | Procaine                  | S | 1 | HA05 |
| Known Interactor | 27115  | PDE7B  | DB00920 | Ketotifen                 | S | 1 | GX08 |
| Known Interactor | 5478   | PPIA   | DB00091 | Cyclosporine              | S | 1 | XA18 |
| Known Interactor | 5733   | PTGER3 | DB06863 | Bimatoprost               | S | 1 | EE03 |
| Known Interactor | 5742   | PTGS1  | DB00465 | Ketorolac                 | S | 1 | BC05 |
| Known Interactor | 5742   | PTGS1  | DB00554 | Piroxicam                 | S | 1 | BC06 |
| Known Interactor | 5742   | PTGS1  | DB00586 | Diclofenac                | S | 1 | BC03 |
| Known Interactor | 5742   | PTGS1  | DB00712 | Flurbiprofen              | S | 1 | BC04 |
| Known Interactor | 5742   | PTGS1  | DB01398 | Salicylate-sodium         | S | 1 | BC08 |
| Known Interactor | 5742   | PTGS1  | DB06802 | Nepafenac                 | S | 1 | BC10 |
| Known Interactor | 5743   | PTGS2  | DB00465 | Ketorolac                 | S | 1 | BC05 |
| Known Interactor | 5743   | PTGS2  | DB00554 | Piroxicam                 | S | 1 | BC06 |
| Known Interactor | 5743   | PTGS2  | DB00586 | Diclofenac                | S | 1 | BC03 |
| Known Interactor | 5743   | PTGS2  | DB00712 | Flurbiprofen              | S | 1 | BC04 |
| Known Interactor | 5743   | PTGS2  | DB01398 | Salicylate-sodium         | S | 1 | BC08 |
| Known Interactor | 5743   | PTGS2  | DB06802 | Nepafenac                 | S | 1 | BC10 |
| Known Interactor | 6271   | S100A1 | DB00768 | Olopatadine               | S | 1 | GX09 |
| Known Interactor | 801    | CALM1  | DB00527 | Cinchocaine               | S | 2 | DA04 |
| Known Interactor | 1956   | EGFR   | DB05291 | Lidocaine                 | S | 2 | DA01 |
| Known Interactor | 5742   | PTGS1  | DB01435 | Antipyrine                | S | 2 | DA03 |
| Known Interactor | 5743   | PTGS2  | DB01435 | Antipyrine                | S | 2 | DA03 |
| Known Interactor | 801    | CALM1  | DB01373 | Calcium                   | V | 3 | AE01 |
| Known Interactor | 801    | CALM1  | DB01373 | Calcium                   | V | 3 | AF04 |

|                  |        |         |         |                        |   |    |      |
|------------------|--------|---------|---------|------------------------|---|----|------|
| Known Interactor | 2099   | ESR1    | DB01183 | Naloxone               | V | 3  | AB15 |
| Known Interactor | 116443 | GRIN3A  | DB00898 | Ethanol                | V | 3  | AB16 |
| Known Interactor | 116443 | GRIN3A  | DB00898 | Ethanol                | V | 3  | AZ01 |
| Known Interactor | 801    | CALM1   | DB01373 | Calcium                | V | 8  | AC10 |
| Novel Interactor | 31     | ACACA   | DB00121 | Biotin                 | A | 11 | HA05 |
| Novel Interactor | 836    | CASP3   | DB01017 | Minocycline            | A | 1  | AB23 |
| Novel Interactor | 2891   | GRIA2   | DB00142 | L-Glutamic Acid        | A | 9  | CA01 |
| Novel Interactor | 5959   | RDH5    | DB00162 | Vitamin A              | A | 11 | CA01 |
| Novel Interactor | 6286   | S100P   | DB01003 | Cromoglicic acid       | A | 7  | EB01 |
| Novel Interactor | 6822   | SULT2A1 | DB06593 | Dehydroepiandrosterone | A | 14 | AA07 |
| Novel Interactor | 7421   | VDR     | DB00136 | Calcitriol             | A | 11 | CC04 |
| Novel Interactor | 7421   | VDR     | DB00146 | Calcidiol              | A | 11 | CC06 |
| Novel Interactor | 7421   | VDR     | DB00153 | Ergocalciferol         | A | 11 | CC01 |
| Novel Interactor | 7421   | VDR     | DB00169 | Cholecalciferol        | A | 11 | CC05 |
| Novel Interactor | 7421   | VDR     | DB01070 | Dihydrotachysterol     | A | 11 | CC02 |
| Novel Interactor | 7421   | VDR     | DB01436 | Alfacalcidol           | A | 11 | CC03 |
| Novel Interactor | 444    | ASPH    | DB00128 | L-Aspartic Acid        | B | 3  | AA09 |
| Novel Interactor | 4035   | LRP1    | DB00025 | Antihemophilic Factor  | B | 2  | BD02 |
| Novel Interactor | 4035   | LRP1    | DB00031 | Tenecteplase           | B | 1  | AD11 |
| Novel Interactor | 4035   | LRP1    | DB00100 | Coagulation Factor IX  | B | 2  | BD04 |
| Novel Interactor | 40     | ASIC2   | DB00594 | Amiloride              | C | 3  | DB01 |
| Novel Interactor | 8912   | CACNA1H | DB00270 | Isradipine             | C | 8  | CA03 |
| Novel Interactor | 8912   | CACNA1H | DB00421 | Spirolactone           | C | 3  | DA01 |
| Novel Interactor | 8912   | CACNA1H | DB01023 | Felodipine             | C | 8  | CA02 |
| Novel Interactor | 8912   | CACNA1H | DB01054 | Nitrendipine           | C | 8  | CA08 |
| Novel Interactor | 8912   | CACNA1H | DB01115 | Nifedipine             | C | 8  | CA05 |
| Novel Interactor | 8912   | CACNA1H | DB01118 | Amiodarone             | C | 1  | BD01 |
| Novel Interactor | 8912   | CACNA1H | DB01244 | Bepidil                | C | 8  | EA02 |
| Novel Interactor | 8912   | CACNA1H | DB01388 | Mibefradil             | C | 8  | CX01 |
| Novel Interactor | 3269   | HRH1    | DB00455 | Loratadine             | C | 9  | AA03 |
| Novel Interactor | 3269   | HRH1    | DB00797 | Tolazoline             | C | 4  | AB02 |
| Novel Interactor | 6323   | SCN1A   | DB04855 | Dronedarone            | C | 1  | BD07 |
| Novel Interactor | 1595   | CYP51A1 | DB01007 | Tioconazole            | D | 1  | AC07 |
| Novel Interactor | 2891   | GRIA2   | DB00794 | Primidone              | D | 8  | AC04 |

|                  |        |         |         |                  |   |    |      |
|------------------|--------|---------|---------|------------------|---|----|------|
| Novel Interactor | 3269   | HRH1    | DB00283 | Clemastine       | D | 4  | AA14 |
| Novel Interactor | 3269   | HRH1    | DB00792 | Tripelennamine   | D | 4  | AA04 |
| Novel Interactor | 3269   | HRH1    | DB01069 | Promethazine     | D | 4  | AA10 |
| Novel Interactor | 3269   | HRH1    | DB06975 | Diphenhydramine  | D | 4  | AA32 |
| Novel Interactor | 3269   | HRH1    | DB06975 | Diphenhydramine  | D | 4  | AA33 |
| Novel Interactor | 3269   | HRH1    | DB06691 | Mepyramine       | D | 4  | AA02 |
| Novel Interactor | 3269   | HRH1    | DB07523 | Chloropyramine   | D | 4  | AA09 |
| Novel Interactor | 3269   | HRH1    | DB08801 | Dimetindene      | D | 4  | AA13 |
| Novel Interactor | 3269   | HRH1    | DB08802 | Isothipendyl     | D | 4  | AA22 |
| Novel Interactor | 5959   | RDH5    | DB00162 | Vitamin A        | D | 10 | AD02 |
| Novel Interactor | 6286   | S100P   | DB01003 | Cromoglicic acid | D | 11 | AH03 |
| Novel Interactor | 7421   | VDR     | DB00136 | Calcitriol       | D | 5  | AX03 |
| Novel Interactor | 7421   | VDR     | DB02300 | Calcipotriol     | D | 5  | AX02 |
| Novel Interactor | 1595   | CYP51A1 | DB01007 | Tioconazole      | G | 1  | AF08 |
| Novel Interactor | 6323   | SCN1A   | DB01438 | Phenazopyridine  | G | 4  | BX06 |
| Novel Interactor | 846    | CASR    | DB01012 | Cinacalcet       | H | 5  | BX01 |
| Novel Interactor | 7421   | VDR     | DB00910 | Paricalcitol     | H | 5  | BX02 |
| Novel Interactor | 836    | CASP3   | DB01017 | Minocycline      | J | 1  | AA08 |
| Novel Interactor | 1595   | CYP51A1 | DB01167 | Itraconazole     | J | 2  | AC02 |
| Novel Interactor | 1969   | EPHA2   | DB01254 | Dasatinib        | L | 1  | XE06 |
| Novel Interactor | 1969   | EPHA2   | DB08896 | Regorafenib      | L | 1  | XE21 |
| Novel Interactor | 116447 | TOP1MT  | DB00762 | Irinotecan       | L | 1  | XX19 |
| Novel Interactor | 116447 | TOP1MT  | DB01030 | Topotecan        | L | 1  | XX17 |
| Novel Interactor | 3269   | HRH1    | DB00797 | Tolazoline       | M | 2  | AX02 |
| Novel Interactor | 3269   | HRH1    | DB01173 | Orphenadrine     | M | 3  | BC01 |
| Novel Interactor | 8912   | CACNA1H | DB00568 | Cinnarizine      | N | 7  | CA02 |
| Novel Interactor | 8912   | CACNA1H | DB00909 | Zonisamide       | N | 3  | AX15 |
| Novel Interactor | 8912   | CACNA1H | DB04841 | Flunarizine      | N | 7  | CA03 |
| Novel Interactor | 2891   | GRIA2   | DB00306 | Talbutal         | N | 5  | CA07 |
| Novel Interactor | 2891   | GRIA2   | DB00312 | Pentobarbital    | N | 5  | CA01 |
| Novel Interactor | 2891   | GRIA2   | DB00418 | Secobarbital     | N | 5  | CA06 |
| Novel Interactor | 2891   | GRIA2   | DB00463 | Metharbital      | N | 3  | AA30 |
| Novel Interactor | 2891   | GRIA2   | DB00599 | Thiopental       | N | 1  | AF03 |
| Novel Interactor | 2891   | GRIA2   | DB00599 | Thiopental       | N | 5  | CA19 |

|                  |      |       |         |                     |   |   |      |
|------------------|------|-------|---------|---------------------|---|---|------|
| Novel Interactor | 2891 | GRIA2 | DB00794 | Primidone           | N | 3 | AA03 |
| Novel Interactor | 2891 | GRIA2 | DB00849 | Methylphenobarbital | N | 3 | AA01 |
| Novel Interactor | 2891 | GRIA2 | DB01174 | Phenobarbital       | N | 3 | AA02 |
| Novel Interactor | 2891 | GRIA2 | DB01351 | Amobarbital         | N | 5 | CA02 |
| Novel Interactor | 2891 | GRIA2 | DB01352 | Aprobarbital        | N | 5 | CA05 |
| Novel Interactor | 2891 | GRIA2 | DB01354 | Heptabarbital       | N | 5 | CA11 |
| Novel Interactor | 2891 | GRIA2 | DB01355 | Hexobarbital        | N | 1 | AF02 |
| Novel Interactor | 2891 | GRIA2 | DB01355 | Hexobarbital        | N | 5 | CA16 |
| Novel Interactor | 2891 | GRIA2 | DB04599 | Aniracetam          | N | 6 | BX11 |
| Novel Interactor | 3269 | HRH1  | DB00215 | Citalopram          | N | 6 | AB04 |
| Novel Interactor | 3269 | HRH1  | DB00215 | Citalopram          | N | 6 | AB10 |
| Novel Interactor | 3269 | HRH1  | DB00245 | Benzatropine        | N | 4 | AC01 |
| Novel Interactor | 3269 | HRH1  | DB00246 | Ziprasidone         | N | 5 | AE04 |
| Novel Interactor | 3269 | HRH1  | DB00321 | Amitriptyline       | N | 6 | AA09 |
| Novel Interactor | 3269 | HRH1  | DB00334 | Olanzapine          | N | 5 | AH03 |
| Novel Interactor | 3269 | HRH1  | DB00363 | Clozapine           | N | 5 | AH02 |
| Novel Interactor | 3269 | HRH1  | DB00370 | Mirtazapine         | N | 6 | AX11 |
| Novel Interactor | 3269 | HRH1  | DB00408 | Loxapine            | N | 5 | AH01 |
| Novel Interactor | 3269 | HRH1  | DB00420 | Promazine           | N | 5 | AA01 |
| Novel Interactor | 3269 | HRH1  | DB00420 | Promazine           | N | 5 | AA02 |
| Novel Interactor | 3269 | HRH1  | DB00420 | Promazine           | N | 5 | AA03 |
| Novel Interactor | 3269 | HRH1  | DB00420 | Promazine           | N | 5 | AA04 |
| Novel Interactor | 3269 | HRH1  | DB00420 | Promazine           | N | 5 | AA05 |
| Novel Interactor | 3269 | HRH1  | DB08002 | Imipramine          | N | 6 | AA02 |
| Novel Interactor | 3269 | HRH1  | DB08002 | Imipramine          | N | 6 | AA03 |
| Novel Interactor | 3269 | HRH1  | DB08002 | Imipramine          | N | 6 | AA06 |
| Novel Interactor | 3269 | HRH1  | DB00540 | Nortriptyline       | N | 6 | AA10 |
| Novel Interactor | 3269 | HRH1  | DB00543 | Amoxapine           | N | 6 | AA17 |
| Novel Interactor | 3269 | HRH1  | DB00557 | Hydroxyzine         | N | 5 | BB01 |
| Novel Interactor | 3269 | HRH1  | DB00568 | Cinnarizine         | N | 7 | CA02 |
| Novel Interactor | 3269 | HRH1  | DB00656 | Trazodone           | N | 6 | AX05 |
| Novel Interactor | 3269 | HRH1  | DB00734 | Risperidone         | N | 5 | AX08 |
| Novel Interactor | 3269 | HRH1  | DB00777 | Propiomazine        | N | 5 | CM06 |
| Novel Interactor | 3269 | HRH1  | DB00934 | Maprotiline         | N | 6 | AA21 |

|                  |      |       |         |                    |   |   |      |
|------------------|------|-------|---------|--------------------|---|---|------|
| Novel Interactor | 3269 | HRH1  | DB01142 | Doxepin            | N | 6 | AA12 |
| Novel Interactor | 3269 | HRH1  | DB07682 | Desipramine        | N | 6 | AA01 |
| Novel Interactor | 3269 | HRH1  | DB01173 | Orphenadrine       | N | 4 | AB02 |
| Novel Interactor | 3269 | HRH1  | DB01224 | Quetiapine         | N | 5 | AH04 |
| Novel Interactor | 3269 | HRH1  | DB01238 | Aripiprazole       | N | 5 | AX12 |
| Novel Interactor | 3269 | HRH1  | DB01239 | Chlorprothixene    | N | 5 | AF03 |
| Novel Interactor | 3269 | HRH1  | DB01267 | Paliperidone       | N | 5 | AX13 |
| Novel Interactor | 3269 | HRH1  | DB08920 | Zuclopenthixol     | N | 5 | AF05 |
| Novel Interactor | 3269 | HRH1  | DB04841 | Flunarizine        | N | 7 | CA03 |
| Novel Interactor | 3269 | HRH1  | DB04946 | lloperidone        | N | 5 | AX14 |
| Novel Interactor | 3269 | HRH1  | DB06148 | Mianserin          | N | 6 | AX03 |
| Novel Interactor | 3269 | HRH1  | DB06216 | Asenapine          | N | 5 | AH05 |
| Novel Interactor | 3269 | HRH1  | DB06698 | Betahistine        | N | 7 | CA01 |
| Novel Interactor | 3760 | KCNJ3 | DB02330 | Halothane          | N | 1 | AB01 |
| Novel Interactor | 6323 | SCN1A | DB00252 | Phenytoin          | N | 3 | AB02 |
| Novel Interactor | 6323 | SCN1A | DB00252 | Phenytoin          | N | 3 | AB04 |
| Novel Interactor | 6323 | SCN1A | DB00252 | Phenytoin          | N | 3 | AB05 |
| Novel Interactor | 6323 | SCN1A | DB00273 | Topiramate         | N | 3 | AX11 |
| Novel Interactor | 6323 | SCN1A | DB00510 | Valproic Acid      | N | 3 | AG01 |
| Novel Interactor | 6323 | SCN1A | DB00909 | Zonisamide         | N | 3 | AX15 |
| Novel Interactor | 6323 | SCN1A | DB01121 | Phenacemide        | N | 3 | AX07 |
| Novel Interactor | 6323 | SCN1A | DB01595 | Nitrazepam         | N | 5 | CD02 |
| Novel Interactor | 6323 | SCN1A | DB04930 | Permethrin         | P | 3 | AC04 |
| Novel Interactor | 2891 | GRIA2 | DB00794 | Primidone          | R | 1 | AX07 |
| Novel Interactor | 2891 | GRIA2 | DB00794 | Primidone          | R | 2 | AA18 |
| Novel Interactor | 3269 | HRH1  | DB00283 | Clemastine         | R | 6 | AA04 |
| Novel Interactor | 3269 | HRH1  | DB00341 | Cetirizine         | R | 6 | AE07 |
| Novel Interactor | 3269 | HRH1  | DB00341 | Cetirizine         | R | 6 | AE09 |
| Novel Interactor | 3269 | HRH1  | DB00342 | Terfenadine        | R | 6 | AX12 |
| Novel Interactor | 3269 | HRH1  | DB00354 | Buclizine          | R | 6 | AE01 |
| Novel Interactor | 3269 | HRH1  | DB00366 | Doxylamine         | R | 6 | AA09 |
| Novel Interactor | 3269 | HRH1  | DB00405 | Dexbrompheniramine | R | 6 | AB06 |
| Novel Interactor | 3269 | HRH1  | DB00427 | Triprolidine       | R | 6 | AX07 |
| Novel Interactor | 3269 | HRH1  | DB00434 | Cyproheptadine     | R | 6 | AX02 |

|                  |      |      |         |                  |   |   |      |
|------------------|------|------|---------|------------------|---|---|------|
| Novel Interactor | 3269 | HRH1 | DB00455 | Loratadine       | R | 6 | AX13 |
| Novel Interactor | 3269 | HRH1 | DB00455 | Loratadine       | R | 6 | AX27 |
| Novel Interactor | 3269 | HRH1 | DB00637 | Astemizole       | R | 6 | AX11 |
| Novel Interactor | 3269 | HRH1 | DB00719 | Azatadine        | R | 6 | AX09 |
| Novel Interactor | 3269 | HRH1 | DB00737 | Meclizine        | R | 6 | AE05 |
| Novel Interactor | 3269 | HRH1 | DB00748 | Carbinoxamine    | R | 6 | AA08 |
| Novel Interactor | 3269 | HRH1 | DB00751 | Epinastine       | R | 6 | AX24 |
| Novel Interactor | 3269 | HRH1 | DB00768 | Olopatadine      | R | 1 | AC08 |
| Novel Interactor | 3269 | HRH1 | DB00792 | Tripelennamine   | R | 6 | AC04 |
| Novel Interactor | 3269 | HRH1 | DB008   | Brompheniramine  | R | 6 | AB01 |
| Novel Interactor | 3269 | HRH1 | DB00902 | Methdilazine     | R | 6 | AD04 |
| Novel Interactor | 3269 | HRH1 | DB00920 | Ketotifen        | R | 6 | AX17 |
| Novel Interactor | 3269 | HRH1 | DB00950 | Fexofenadine     | R | 6 | AX26 |
| Novel Interactor | 3269 | HRH1 | DB00972 | Azelastine       | R | 1 | AC03 |
| Novel Interactor | 3269 | HRH1 | DB00972 | Azelastine       | R | 6 | AX19 |
| Novel Interactor | 3269 | HRH1 | DB00985 | Dimenhydrinate   | R | 6 | AA02 |
| Novel Interactor | 3269 | HRH1 | DB01069 | Promethazine     | R | 6 | AD02 |
| Novel Interactor | 3269 | HRH1 | DB01069 | Promethazine     | R | 6 | AD05 |
| Novel Interactor | 3269 | HRH1 | DB01071 | Mequitazine      | R | 6 | AD07 |
| Novel Interactor | 3269 | HRH1 | DB01106 | Levocabastine    | R | 1 | AC02 |
| Novel Interactor | 3269 | HRH1 | DB01114 | Chlorphenamine   | R | 6 | AB02 |
| Novel Interactor | 3269 | HRH1 | DB01114 | Chlorphenamine   | R | 6 | AB04 |
| Novel Interactor | 3269 | HRH1 | DB01146 | Diphenylpyraline | R | 6 | AA07 |
| Novel Interactor | 3269 | HRH1 | DB01176 | Cyclizine        | R | 6 | AE03 |
| Novel Interactor | 3269 | HRH1 | DB01176 | Cyclizine        | R | 6 | AE04 |
| Novel Interactor | 3269 | HRH1 | DB01246 | Alimemazine      | R | 6 | AD01 |
| Novel Interactor | 3269 | HRH1 | DB01619 | Phenindamine     | R | 6 | AX04 |
| Novel Interactor | 3269 | HRH1 | DB01620 | Pheniramine      | R | 6 | AB05 |
| Novel Interactor | 3269 | HRH1 | DB06691 | Mepyramine       | R | 6 | AC01 |
| Novel Interactor | 3269 | HRH1 | DB08799 | Antazoline       | R | 1 | AC04 |
| Novel Interactor | 3269 | HRH1 | DB07523 | Chloropyramine   | R | 6 | AC03 |
| Novel Interactor | 3269 | HRH1 | DB08801 | Dimetindene      | R | 6 | AB03 |
| Novel Interactor | 3269 | HRH1 | DB08802 | Isothipendyl     | R | 6 | AD09 |
| Novel Interactor | 5959 | RDH5 | DB00162 | Vitamin A        | R | 1 | AX02 |

|                  |      |       |         |                     |   |   |      |
|------------------|------|-------|---------|---------------------|---|---|------|
| Novel Interactor | 6286 | S100P | DB01003 | Cromoglicic acid    | R | 1 | AC01 |
| Novel Interactor | 6286 | S100P | DB01003 | Cromoglicic acid    | R | 3 | BC01 |
| Novel Interactor | 2891 | GRIA2 | DB00794 | Primidone           | S | 1 | AX08 |
| Novel Interactor | 2891 | GRIA2 | DB00794 | Primidone           | S | 3 | AA05 |
| Novel Interactor | 3269 | HRH1  | DB00751 | Epinastine          | S | 1 | GX10 |
| Novel Interactor | 3269 | HRH1  | DB00768 | Olopatadine         | S | 1 | GX09 |
| Novel Interactor | 3269 | HRH1  | DB00920 | Ketotifen           | S | 1 | GX08 |
| Novel Interactor | 3269 | HRH1  | DB00972 | Azelastine          | S | 1 | GX07 |
| Novel Interactor | 3269 | HRH1  | DB01084 | Emedastine          | S | 1 | GX06 |
| Novel Interactor | 3269 | HRH1  | DB01106 | Levocabastine       | S | 1 | GX02 |
| Novel Interactor | 8829 | NRP1  | DB04895 | Pegaptanib          | S | 1 | LA03 |
| Novel Interactor | 5959 | RDH5  | DB00162 | Vitamin A           | S | 1 | XA02 |
| Novel Interactor | 6286 | S100P | DB01003 | Cromoglicic acid    | S | 1 | GX01 |
| Novel Interactor | 3269 | HRH1  | DB00667 | Histamine Phosphate | V | 4 | CG03 |
| Novel Interactor | 3269 | HRH1  | DB01146 | Diphenylpyraline    | V | 1 | AA02 |
| Novel Interactor | 3269 | HRH1  | DB01146 | Diphenylpyraline    | V | 1 | AA20 |
| Novel Interactor | 8829 | NRP1  | DB00039 | Palifermin          | V | 3 | AF08 |

## Drugs of Historical Gene Interactome

| Gene Role      | Gene Entrez ID | Gene Symbol | Drugbank ID | Drug Name           | Anatomic | Category    |          |
|----------------|----------------|-------------|-------------|---------------------|----------|-------------|----------|
|                |                |             |             |                     |          | Therapeutic | Chemical |
| Candidate Gene | 207            | AKT1        | DB01169     | Arsenic trioxide    | L        | 1           | XX27     |
| Candidate Gene | 1139           | CHRNA7      | DB00184     | Nicotine            | A        | 11          | HA01     |
| Candidate Gene | 1139           | CHRNA7      | DB00184     | Nicotine            | C        | 4           | AC01     |
| Candidate Gene | 1139           | CHRNA7      | DB00184     | Nicotine            | C        | 10          | AD02     |
| Candidate Gene | 1139           | CHRNA7      | DB00184     | Nicotine            | N        | 7           | BA01     |
| Candidate Gene | 1139           | CHRNA7      | DB00306     | Talbutal            | N        | 5           | CA07     |
| Candidate Gene | 1139           | CHRNA7      | DB00312     | Pentobarbital       | N        | 5           | CA01     |
| Candidate Gene | 1139           | CHRNA7      | DB00418     | Secobarbital        | N        | 5           | CA06     |
| Candidate Gene | 1139           | CHRNA7      | DB00463     | Metharbital         | N        | 3           | AA30     |
| Candidate Gene | 1139           | CHRNA7      | DB00514     | Dextromethorphan    | R        | 5           | DA09     |
| Candidate Gene | 1139           | CHRNA7      | DB00599     | Thiopental          | N        | 1           | AF03     |
| Candidate Gene | 1139           | CHRNA7      | DB00599     | Thiopental          | N        | 5           | CA19     |
| Candidate Gene | 1139           | CHRNA7      | DB00674     | Galantamine         | N        | 6           | DA04     |
| Candidate Gene | 1139           | CHRNA7      | DB00794     | Primidone           | D        | 8           | AC04     |
| Candidate Gene | 1139           | CHRNA7      | DB00794     | Primidone           | N        | 3           | AA03     |
| Candidate Gene | 1139           | CHRNA7      | DB00794     | Primidone           | R        | 1           | AX07     |
| Candidate Gene | 1139           | CHRNA7      | DB00794     | Primidone           | R        | 2           | AA18     |
| Candidate Gene | 1139           | CHRNA7      | DB00794     | Primidone           | S        | 1           | AX08     |
| Candidate Gene | 1139           | CHRNA7      | DB00794     | Primidone           | S        | 3           | AA05     |
| Candidate Gene | 1139           | CHRNA7      | DB00849     | Methylphenobarbital | N        | 3           | AA01     |
| Candidate Gene | 1139           | CHRNA7      | DB01174     | Phenobarbital       | N        | 3           | AA02     |
| Candidate Gene | 1139           | CHRNA7      | DB01273     | Varenicline         | N        | 7           | BA03     |
| Candidate Gene | 1139           | CHRNA7      | DB01351     | Amobarbital         | N        | 5           | CA02     |
| Candidate Gene | 1139           | CHRNA7      | DB01352     | Aprobarbital        | N        | 5           | CA05     |
| Candidate Gene | 1139           | CHRNA7      | DB01354     | Heptabarbital       | N        | 5           | CA11     |
| Candidate Gene | 1139           | CHRNA7      | DB01355     | Hexobarbital        | N        | 1           | AF02     |
| Candidate Gene | 1139           | CHRNA7      | DB01355     | Hexobarbital        | N        | 5           | CA16     |
| Candidate Gene | 1312           | COMT        | DB00323     | Tolcapone           | N        | 4           | BX01     |
| Candidate Gene | 1312           | COMT        | DB00494     | Entacapone          | N        | 4           | BX02     |
| Candidate Gene | 1312           | COMT        | DB04820     | Nialamide           | N        | 6           | AF02     |



|                |      |      |         |                  |   |   |      |
|----------------|------|------|---------|------------------|---|---|------|
| Candidate Gene | 1813 | DRD2 | DB00182 | Amphetamine      | N | 6 | BA01 |
| Candidate Gene | 1813 | DRD2 | DB00246 | Ziprasidone      | N | 5 | AE04 |
| Candidate Gene | 1813 | DRD2 | DB00248 | Cabergoline      | G | 2 | CB03 |
| Candidate Gene | 1813 | DRD2 | DB00248 | Cabergoline      | N | 4 | BC06 |
| Candidate Gene | 1813 | DRD2 | DB00268 | Ropinirole       | N | 4 | BC04 |
| Candidate Gene | 1813 | DRD2 | DB00334 | Olanzapine       | N | 5 | AH03 |
| Candidate Gene | 1813 | DRD2 | DB00363 | Clozapine        | N | 5 | AH02 |
| Candidate Gene | 1813 | DRD2 | DB00370 | Mirtazapine      | N | 6 | AX11 |
| Candidate Gene | 1813 | DRD2 | DB00372 | Thiethylperazine | R | 6 | AD03 |
| Candidate Gene | 1813 | DRD2 | DB00391 | Sulpiride        | N | 5 | AL01 |
| Candidate Gene | 1813 | DRD2 | DB00391 | Sulpiride        | N | 5 | AL07 |
| Candidate Gene | 1813 | DRD2 | DB00408 | Loxapine         | N | 5 | AH01 |
| Candidate Gene | 1813 | DRD2 | DB00409 | Remoxipride      | N | 5 | AL04 |
| Candidate Gene | 1813 | DRD2 | DB00413 | Pramipexole      | N | 4 | BC05 |
| Candidate Gene | 1813 | DRD2 | DB00420 | Promazine        | N | 5 | AA01 |
| Candidate Gene | 1813 | DRD2 | DB00420 | Promazine        | N | 5 | AA02 |
| Candidate Gene | 1813 | DRD2 | DB00420 | Promazine        | N | 5 | AA03 |
| Candidate Gene | 1813 | DRD2 | DB00420 | Promazine        | N | 5 | AA04 |
| Candidate Gene | 1813 | DRD2 | DB00420 | Promazine        | N | 5 | AA05 |
| Candidate Gene | 1813 | DRD2 | DB00433 | Prochlorperazine | N | 5 | AB04 |
| Candidate Gene | 1813 | DRD2 | DB00450 | Droperidol       | N | 5 | AD08 |
| Candidate Gene | 1813 | DRD2 | DB08002 | Imipramine       | N | 6 | AA02 |
| Candidate Gene | 1813 | DRD2 | DB08002 | Imipramine       | N | 6 | AA03 |
| Candidate Gene | 1813 | DRD2 | DB08002 | Imipramine       | N | 6 | AA06 |
| Candidate Gene | 1813 | DRD2 | DB00490 | Buspirone        | N | 5 | BE01 |
| Candidate Gene | 1813 | DRD2 | DB00502 | Haloperidol      | N | 5 | AD01 |
| Candidate Gene | 1813 | DRD2 | DB00540 | Nortriptyline    | N | 6 | AA10 |
| Candidate Gene | 1813 | DRD2 | DB00543 | Amoxapine        | N | 6 | AA17 |
| Candidate Gene | 1813 | DRD2 | DB00568 | Cinnarizine      | N | 7 | CA02 |
| Candidate Gene | 1813 | DRD2 | DB00589 | Lisuride         | G | 2 | CB02 |
| Candidate Gene | 1813 | DRD2 | DB00589 | Lisuride         | N | 2 | CA07 |
| Candidate Gene | 1813 | DRD2 | DB00623 | Fluphenazine     | N | 5 | AB02 |
| Candidate Gene | 1813 | DRD2 | DB00679 | Thioridazine     | N | 5 | AC02 |
| Candidate Gene | 1813 | DRD2 | DB00696 | Ergotamine       | N | 2 | CA02 |

|                |      |      |         |                   |   |   |      |
|----------------|------|------|---------|-------------------|---|---|------|
| Candidate Gene | 1813 | DRD2 | DB00734 | Risperidone       | N | 5 | AX08 |
| Candidate Gene | 1813 | DRD2 | DB00777 | Propiomazine      | N | 5 | CM06 |
| Candidate Gene | 1813 | DRD2 | DB00805 | Minaprine         | N | 6 | AX07 |
| Candidate Gene | 1813 | DRD2 | DB08616 | Trifluoperazine   | N | 5 | AB06 |
| Candidate Gene | 1813 | DRD2 | DB00850 | Perphenazine      | N | 5 | AB03 |
| Candidate Gene | 1813 | DRD2 | DB00915 | Amantadine        | N | 4 | BB01 |
| Candidate Gene | 1813 | DRD2 | DB00933 | Mesoridazine      | N | 5 | AC03 |
| Candidate Gene | 1813 | DRD2 | DB00934 | Maprotiline       | N | 6 | AA21 |
| Candidate Gene | 1813 | DRD2 | DB00988 | Dopamine          | C | 1 | CA04 |
| Candidate Gene | 1813 | DRD2 | DB01043 | Memantine         | N | 6 | DX01 |
| Candidate Gene | 1813 | DRD2 | DB01287 | Ergoloid mesylate | C | 4 | AE01 |
| Candidate Gene | 1813 | DRD2 | DB01063 | Acetophenazine    | N | 5 | AB07 |
| Candidate Gene | 1813 | DRD2 | DB01069 | Promethazine      | D | 4 | AA10 |
| Candidate Gene | 1813 | DRD2 | DB01069 | Promethazine      | R | 6 | AD02 |
| Candidate Gene | 1813 | DRD2 | DB01069 | Promethazine      | R | 6 | AD05 |
| Candidate Gene | 1813 | DRD2 | DB01100 | Pimozide          | N | 5 | AG02 |
| Candidate Gene | 1813 | DRD2 | DB01142 | Doxepin           | N | 6 | AA12 |
| Candidate Gene | 1813 | DRD2 | DB07682 | Desipramine       | N | 6 | AA01 |
| Candidate Gene | 1813 | DRD2 | DB01184 | Domperidone       | A | 3 | FA03 |
| Candidate Gene | 1813 | DRD2 | DB01186 | Pergolide         | N | 4 | BC02 |
| Candidate Gene | 1813 | DRD2 | DB01200 | Bromocriptine     | G | 2 | CB01 |
| Candidate Gene | 1813 | DRD2 | DB01200 | Bromocriptine     | N | 4 | BC01 |
| Candidate Gene | 1813 | DRD2 | DB01221 | Ketamine          | N | 1 | AX03 |
| Candidate Gene | 1813 | DRD2 | DB01221 | Ketamine          | N | 1 | AX14 |
| Candidate Gene | 1813 | DRD2 | DB01224 | Quetiapine        | N | 5 | AH04 |
| Candidate Gene | 1813 | DRD2 | DB01233 | Metoclopramide    | A | 3 | FA01 |
| Candidate Gene | 1813 | DRD2 | DB01235 | L-DOPA            | N | 4 | BA01 |
| Candidate Gene | 1813 | DRD2 | DB01235 | L-DOPA            | N | 4 | BA04 |
| Candidate Gene | 1813 | DRD2 | DB01238 | Aripiprazole      | N | 5 | AX12 |
| Candidate Gene | 1813 | DRD2 | DB01239 | Chlorprothixene   | N | 5 | AF03 |
| Candidate Gene | 1813 | DRD2 | DB01267 | Paliperidone      | N | 5 | AX13 |
| Candidate Gene | 1813 | DRD2 | DB01392 | Yohimbine         | G | 4 | BE04 |
| Candidate Gene | 1813 | DRD2 | DB01425 | Alizapride        | A | 3 | FA05 |
| Candidate Gene | 1813 | DRD2 | DB01618 | Molindone         | N | 5 | AE02 |

|                |      |      |         |                |   |   |      |
|----------------|------|------|---------|----------------|---|---|------|
| Candidate Gene | 1813 | DRD2 | DB01621 | Pipotiazine    | N | 5 | AC04 |
| Candidate Gene | 1813 | DRD2 | DB01622 | Thiopropazine  | N | 5 | AB08 |
| Candidate Gene | 1813 | DRD2 | DB01623 | Thiothixene    | N | 5 | AF04 |
| Candidate Gene | 1813 | DRD2 | DB08920 | Zuclopenthixol | N | 5 | AF05 |
| Candidate Gene | 1813 | DRD2 | DB04599 | Aniracetam     | N | 6 | BX11 |
| Candidate Gene | 1813 | DRD2 | DB04842 | Fluspirilene   | N | 5 | AG01 |
| Candidate Gene | 1813 | DRD2 | DB04844 | Tetrabenazine  | N | 7 | XX06 |
| Candidate Gene | 1813 | DRD2 | DB04946 | Iloperidone    | N | 5 | AX14 |
| Candidate Gene | 1813 | DRD2 | DB05271 | Rotigotine     | N | 4 | BC09 |
| Candidate Gene | 1813 | DRD2 | DB06144 | Sertindole     | N | 5 | AE03 |
| Candidate Gene | 1813 | DRD2 | DB06148 | Mianserin      | N | 6 | AX03 |
| Candidate Gene | 1813 | DRD2 | DB06216 | Asenapine      | N | 5 | AH05 |
| Candidate Gene | 1813 | DRD2 | DB06288 | Amisulpride    | N | 5 | AL05 |
| Candidate Gene | 1813 | DRD2 | DB08815 | Lurasidone     | N | 5 | AE05 |
| Candidate Gene | 1814 | DRD3 | DB00246 | Ziprasidone    | N | 5 | AE04 |
| Candidate Gene | 1814 | DRD3 | DB00248 | Cabergoline    | G | 2 | CB03 |
| Candidate Gene | 1814 | DRD3 | DB00248 | Cabergoline    | N | 4 | BC06 |
| Candidate Gene | 1814 | DRD3 | DB00268 | Ropinirole     | N | 4 | BC04 |
| Candidate Gene | 1814 | DRD3 | DB00334 | Olanzapine     | N | 5 | AH03 |
| Candidate Gene | 1814 | DRD3 | DB00363 | Clozapine      | N | 5 | AH02 |
| Candidate Gene | 1814 | DRD3 | DB00370 | Mirtazapine    | N | 6 | AX11 |
| Candidate Gene | 1814 | DRD3 | DB00391 | Sulpiride      | N | 5 | AL01 |
| Candidate Gene | 1814 | DRD3 | DB00391 | Sulpiride      | N | 5 | AL07 |
| Candidate Gene | 1814 | DRD3 | DB00408 | Loxapine       | N | 5 | AH01 |
| Candidate Gene | 1814 | DRD3 | DB00409 | Remoxipride    | N | 5 | AL04 |
| Candidate Gene | 1814 | DRD3 | DB00413 | Pramipexole    | N | 4 | BC05 |
| Candidate Gene | 1814 | DRD3 | DB00502 | Haloperidol    | N | 5 | AD01 |
| Candidate Gene | 1814 | DRD3 | DB00543 | Amoxapine      | N | 6 | AA17 |
| Candidate Gene | 1814 | DRD3 | DB00589 | Lisuride       | G | 2 | CB02 |
| Candidate Gene | 1814 | DRD3 | DB00589 | Lisuride       | N | 2 | CA07 |
| Candidate Gene | 1814 | DRD3 | DB00734 | Risperidone    | N | 5 | AX08 |
| Candidate Gene | 1814 | DRD3 | DB00988 | Dopamine       | C | 1 | CA04 |
| Candidate Gene | 1814 | DRD3 | DB01100 | Pimozide       | N | 5 | AG02 |
| Candidate Gene | 1814 | DRD3 | DB01184 | Domperidone    | A | 3 | FA03 |

|                |      |      |         |                  |   |   |      |
|----------------|------|------|---------|------------------|---|---|------|
| Candidate Gene | 1814 | DRD3 | DB01186 | Pergolide        | N | 4 | BC02 |
| Candidate Gene | 1814 | DRD3 | DB01200 | Bromocriptine    | G | 2 | CB01 |
| Candidate Gene | 1814 | DRD3 | DB01200 | Bromocriptine    | N | 4 | BC01 |
| Candidate Gene | 1814 | DRD3 | DB01224 | Quetiapine       | N | 5 | AH04 |
| Candidate Gene | 1814 | DRD3 | DB01235 | L-DOPA           | N | 4 | BA01 |
| Candidate Gene | 1814 | DRD3 | DB01235 | L-DOPA           | N | 4 | BA04 |
| Candidate Gene | 1814 | DRD3 | DB01238 | Aripiprazole     | N | 5 | AX12 |
| Candidate Gene | 1814 | DRD3 | DB01239 | Chlorprothixene  | N | 5 | AF03 |
| Candidate Gene | 1814 | DRD3 | DB01267 | Paliperidone     | N | 5 | AX13 |
| Candidate Gene | 1814 | DRD3 | DB01392 | Yohimbine        | G | 4 | BE04 |
| Candidate Gene | 1814 | DRD3 | DB04946 | lloperidone      | N | 5 | AX14 |
| Candidate Gene | 1814 | DRD3 | DB05271 | Rotigotine       | N | 4 | BC09 |
| Candidate Gene | 1814 | DRD3 | DB06148 | Mianserin        | N | 6 | AX03 |
| Candidate Gene | 1814 | DRD3 | DB06216 | Asenapine        | N | 5 | AH05 |
| Candidate Gene | 1814 | DRD3 | DB06288 | Amisulpride      | N | 5 | AL05 |
| Candidate Gene | 1815 | DRD4 | DB00246 | Ziprasidone      | N | 5 | AE04 |
| Candidate Gene | 1815 | DRD4 | DB00248 | Cabergoline      | G | 2 | CB03 |
| Candidate Gene | 1815 | DRD4 | DB00248 | Cabergoline      | N | 4 | BC06 |
| Candidate Gene | 1815 | DRD4 | DB00268 | Ropinirole       | N | 4 | BC04 |
| Candidate Gene | 1815 | DRD4 | DB00334 | Olanzapine       | N | 5 | AH03 |
| Candidate Gene | 1815 | DRD4 | DB00363 | Clozapine        | N | 5 | AH02 |
| Candidate Gene | 1815 | DRD4 | DB00372 | Thiethylperazine | R | 6 | AD03 |
| Candidate Gene | 1815 | DRD4 | DB00408 | Loxapine         | N | 5 | AH01 |
| Candidate Gene | 1815 | DRD4 | DB00409 | Remoxipride      | N | 5 | AL04 |
| Candidate Gene | 1815 | DRD4 | DB00413 | Pramipexole      | N | 4 | BC05 |
| Candidate Gene | 1815 | DRD4 | DB00420 | Promazine        | N | 5 | AA01 |
| Candidate Gene | 1815 | DRD4 | DB00420 | Promazine        | N | 5 | AA02 |
| Candidate Gene | 1815 | DRD4 | DB00420 | Promazine        | N | 5 | AA03 |
| Candidate Gene | 1815 | DRD4 | DB00420 | Promazine        | N | 5 | AA04 |
| Candidate Gene | 1815 | DRD4 | DB00420 | Promazine        | N | 5 | AA05 |
| Candidate Gene | 1815 | DRD4 | DB00543 | Amoxapine        | N | 6 | AA17 |
| Candidate Gene | 1815 | DRD4 | DB00589 | Lisuride         | G | 2 | CB02 |
| Candidate Gene | 1815 | DRD4 | DB00589 | Lisuride         | N | 2 | CA07 |
| Candidate Gene | 1815 | DRD4 | DB00734 | Risperidone      | N | 5 | AX08 |

|                |      |       |         |                |   |   |      |
|----------------|------|-------|---------|----------------|---|---|------|
| Candidate Gene | 1815 | DRD4  | DB00777 | Propiomazine   | N | 5 | CM06 |
| Candidate Gene | 1815 | DRD4  | DB00988 | Dopamine       | C | 1 | CA04 |
| Candidate Gene | 1815 | DRD4  | DB01186 | Pergolide      | N | 4 | BC02 |
| Candidate Gene | 1815 | DRD4  | DB01200 | Bromocriptine  | G | 2 | CB01 |
| Candidate Gene | 1815 | DRD4  | DB01200 | Bromocriptine  | N | 4 | BC01 |
| Candidate Gene | 1815 | DRD4  | DB01224 | Quetiapine     | N | 5 | AH04 |
| Candidate Gene | 1815 | DRD4  | DB01235 | L-DOPA         | N | 4 | BA01 |
| Candidate Gene | 1815 | DRD4  | DB01235 | L-DOPA         | N | 4 | BA04 |
| Candidate Gene | 1815 | DRD4  | DB01238 | Aripiprazole   | N | 5 | AX12 |
| Candidate Gene | 1815 | DRD4  | DB01267 | Paliperidone   | N | 5 | AX13 |
| Candidate Gene | 1815 | DRD4  | DB04946 | lloperidone    | N | 5 | AX14 |
| Candidate Gene | 1815 | DRD4  | DB05271 | Rotigotine     | N | 4 | BC09 |
| Candidate Gene | 1815 | DRD4  | DB06216 | Asenapine      | N | 5 | AH05 |
| Candidate Gene | 3356 | HTR2A | DB00246 | Ziprasidone    | N | 5 | AE04 |
| Candidate Gene | 3356 | HTR2A | DB00247 | Methysergide   | N | 2 | CA04 |
| Candidate Gene | 3356 | HTR2A | DB00248 | Cabergoline    | G | 2 | CB03 |
| Candidate Gene | 3356 | HTR2A | DB00248 | Cabergoline    | N | 4 | BC06 |
| Candidate Gene | 3356 | HTR2A | DB00268 | Ropinirole     | N | 4 | BC04 |
| Candidate Gene | 3356 | HTR2A | DB00321 | Amitriptyline  | N | 6 | AA09 |
| Candidate Gene | 3356 | HTR2A | DB00334 | Olanzapine     | N | 5 | AH03 |
| Candidate Gene | 3356 | HTR2A | DB00363 | Clozapine      | N | 5 | AH02 |
| Candidate Gene | 3356 | HTR2A | DB00370 | Mirtazapine    | N | 6 | AX11 |
| Candidate Gene | 3356 | HTR2A | DB00408 | Loxapine       | N | 5 | AH01 |
| Candidate Gene | 3356 | HTR2A | DB00409 | Remoxipride    | N | 5 | AL04 |
| Candidate Gene | 3356 | HTR2A | DB00413 | Pramipexole    | N | 4 | BC05 |
| Candidate Gene | 3356 | HTR2A | DB00420 | Promazine      | N | 5 | AA01 |
| Candidate Gene | 3356 | HTR2A | DB00420 | Promazine      | N | 5 | AA02 |
| Candidate Gene | 3356 | HTR2A | DB00420 | Promazine      | N | 5 | AA03 |
| Candidate Gene | 3356 | HTR2A | DB00420 | Promazine      | N | 5 | AA04 |
| Candidate Gene | 3356 | HTR2A | DB00420 | Promazine      | N | 5 | AA05 |
| Candidate Gene | 3356 | HTR2A | DB00434 | Cyproheptadine | R | 6 | AX02 |
| Candidate Gene | 3356 | HTR2A | DB08002 | Imipramine     | N | 6 | AA02 |
| Candidate Gene | 3356 | HTR2A | DB08002 | Imipramine     | N | 6 | AA03 |
| Candidate Gene | 3356 | HTR2A | DB08002 | Imipramine     | N | 6 | AA06 |

|                |      |       |         |                   |   |   |      |
|----------------|------|-------|---------|-------------------|---|---|------|
| Candidate Gene | 3356 | HTR2A | DB00502 | Haloperidol       | N | 5 | AD01 |
| Candidate Gene | 3356 | HTR2A | DB00540 | Nortriptyline     | N | 6 | AA10 |
| Candidate Gene | 3356 | HTR2A | DB00543 | Amoxapine         | N | 6 | AA17 |
| Candidate Gene | 3356 | HTR2A | DB00589 | Lisuride          | G | 2 | CB02 |
| Candidate Gene | 3356 | HTR2A | DB00589 | Lisuride          | N | 2 | CA07 |
| Candidate Gene | 3356 | HTR2A | DB00604 | Cisapride         | A | 3 | FA02 |
| Candidate Gene | 3356 | HTR2A | DB00656 | Trazodone         | N | 6 | AX05 |
| Candidate Gene | 3356 | HTR2A | DB00679 | Thioridazine      | N | 5 | AC02 |
| Candidate Gene | 3356 | HTR2A | DB00696 | Ergotamine        | N | 2 | CA02 |
| Candidate Gene | 3356 | HTR2A | DB00715 | Paroxetine        | N | 6 | AB05 |
| Candidate Gene | 3356 | HTR2A | DB00734 | Risperidone       | N | 5 | AX08 |
| Candidate Gene | 3356 | HTR2A | DB00751 | Epinastine        | R | 6 | AX24 |
| Candidate Gene | 3356 | HTR2A | DB00751 | Epinastine        | S | 1 | GX10 |
| Candidate Gene | 3356 | HTR2A | DB00777 | Propiomazine      | N | 5 | CM06 |
| Candidate Gene | 3356 | HTR2A | DB00805 | Minaprine         | N | 6 | AX07 |
| Candidate Gene | 3356 | HTR2A | DB00843 | Donepezil         | N | 6 | DA02 |
| Candidate Gene | 3356 | HTR2A | DB00924 | Cyclobenzaprine   | M | 3 | BX08 |
| Candidate Gene | 3356 | HTR2A | DB00933 | Mesoridazine      | N | 5 | AC03 |
| Candidate Gene | 3356 | HTR2A | DB00934 | Maprotiline       | N | 6 | AA21 |
| Candidate Gene | 3356 | HTR2A | DB01287 | Ergoloid mesylate | C | 4 | AE01 |
| Candidate Gene | 3356 | HTR2A | DB01069 | Promethazine      | D | 4 | AA10 |
| Candidate Gene | 3356 | HTR2A | DB01069 | Promethazine      | R | 6 | AD02 |
| Candidate Gene | 3356 | HTR2A | DB01069 | Promethazine      | R | 6 | AD05 |
| Candidate Gene | 3356 | HTR2A | DB01079 | Tegaserod         | A | 6 | AX06 |
| Candidate Gene | 3356 | HTR2A | DB01142 | Doxepin           | N | 6 | AA12 |
| Candidate Gene | 3356 | HTR2A | DB01149 | Nefazodone        | N | 6 | AX06 |
| Candidate Gene | 3356 | HTR2A | DB07682 | Desipramine       | N | 6 | AA01 |
| Candidate Gene | 3356 | HTR2A | DB01186 | Pergolide         | N | 4 | BC02 |
| Candidate Gene | 3356 | HTR2A | DB01200 | Bromocriptine     | G | 2 | CB01 |
| Candidate Gene | 3356 | HTR2A | DB01200 | Bromocriptine     | N | 4 | BC01 |
| Candidate Gene | 3356 | HTR2A | DB01221 | Ketamine          | N | 1 | AX03 |
| Candidate Gene | 3356 | HTR2A | DB01221 | Ketamine          | N | 1 | AX14 |
| Candidate Gene | 3356 | HTR2A | DB01224 | Quetiapine        | N | 5 | AH04 |
| Candidate Gene | 3356 | HTR2A | DB01238 | Aripiprazole      | N | 5 | AX12 |

|                |      |        |         |                 |   |   |      |
|----------------|------|--------|---------|-----------------|---|---|------|
| Candidate Gene | 3356 | HTR2A  | DB01239 | Chlorprothixene | N | 5 | AF03 |
| Candidate Gene | 3356 | HTR2A  | DB07600 | Clomipramine    | N | 6 | AA04 |
| Candidate Gene | 3356 | HTR2A  | DB01267 | Paliperidone    | N | 5 | AX13 |
| Candidate Gene | 3356 | HTR2A  | DB01392 | Yohimbine       | G | 4 | BE04 |
| Candidate Gene | 3356 | HTR2A  | DB01618 | Molindone       | N | 5 | AE02 |
| Candidate Gene | 3356 | HTR2A  | DB01621 | Pipotiazine     | N | 5 | AC04 |
| Candidate Gene | 3356 | HTR2A  | DB01622 | Thiopropazine   | N | 5 | AB08 |
| Candidate Gene | 3356 | HTR2A  | DB01623 | Thiothixene     | N | 5 | AF04 |
| Candidate Gene | 3356 | HTR2A  | DB08920 | Zuclopenthixol  | N | 5 | AF05 |
| Candidate Gene | 3356 | HTR2A  | DB04599 | Aniracetam      | N | 6 | BX11 |
| Candidate Gene | 3356 | HTR2A  | DB04946 | lloperidone     | N | 5 | AX14 |
| Candidate Gene | 3356 | HTR2A  | DB06144 | Sertindole      | N | 5 | AE03 |
| Candidate Gene | 3356 | HTR2A  | DB06148 | Mianserin       | N | 6 | AX03 |
| Candidate Gene | 3356 | HTR2A  | DB06216 | Asenapine       | N | 5 | AH05 |
| Candidate Gene | 3356 | HTR2A  | DB06288 | Amisulpride     | N | 5 | AL05 |
| Candidate Gene | 3356 | HTR2A  | DB08815 | Lurasidone      | N | 5 | AE05 |
| Candidate Gene | 4524 | MTHFR  | DB00115 | Cyanocobalamin  | B | 3 | BA01 |
| Candidate Gene | 4524 | MTHFR  | DB00115 | Cyanocobalamin  | B | 3 | BB01 |
| Candidate Gene | 6531 | SLC6A3 | DB00182 | Amphetamine     | N | 6 | BA01 |
| Candidate Gene | 6531 | SLC6A3 | DB00191 | Phentermine     | A | 8 | AA01 |
| Candidate Gene | 6531 | SLC6A3 | DB00245 | Benzatropine    | N | 4 | AC01 |
| Candidate Gene | 6531 | SLC6A3 | DB00285 | Venlafaxine     | N | 6 | AX16 |
| Candidate Gene | 6531 | SLC6A3 | DB00285 | Venlafaxine     | N | 6 | AX23 |
| Candidate Gene | 6531 | SLC6A3 | DB00289 | Atomoxetine     | N | 6 | BA09 |
| Candidate Gene | 6531 | SLC6A3 | DB00370 | Mirtazapine     | N | 6 | AX11 |
| Candidate Gene | 6531 | SLC6A3 | DB00408 | Loxapine        | N | 5 | AH01 |
| Candidate Gene | 6531 | SLC6A3 | DB00422 | Methylphenidate | N | 6 | BA04 |
| Candidate Gene | 6531 | SLC6A3 | DB00454 | Pethidine       | N | 2 | AB02 |
| Candidate Gene | 6531 | SLC6A3 | DB08002 | Imipramine      | N | 6 | AA02 |
| Candidate Gene | 6531 | SLC6A3 | DB08002 | Imipramine      | N | 6 | AA03 |
| Candidate Gene | 6531 | SLC6A3 | DB08002 | Imipramine      | N | 6 | AA06 |
| Candidate Gene | 6531 | SLC6A3 | DB00476 | Duloxetine      | N | 6 | AX21 |
| Candidate Gene | 6531 | SLC6A3 | DB00543 | Amoxapine       | N | 6 | AA17 |
| Candidate Gene | 6531 | SLC6A3 | DB00579 | Mazindol        | A | 8 | AA05 |

|                |      |        |         |                    |   |   |      |
|----------------|------|--------|---------|--------------------|---|---|------|
| Candidate Gene | 6531 | SLC6A3 | DB00721 | Procaine           | C | 1 | BA02 |
| Candidate Gene | 6531 | SLC6A3 | DB00721 | Procaine           | C | 5 | AD05 |
| Candidate Gene | 6531 | SLC6A3 | DB00721 | Procaine           | D | 4 | AB03 |
| Candidate Gene | 6531 | SLC6A3 | DB00721 | Procaine           | J | 1 | CE09 |
| Candidate Gene | 6531 | SLC6A3 | DB00721 | Procaine           | N | 1 | BA02 |
| Candidate Gene | 6531 | SLC6A3 | DB00721 | Procaine           | N | 1 | BA04 |
| Candidate Gene | 6531 | SLC6A3 | DB00721 | Procaine           | S | 1 | HA02 |
| Candidate Gene | 6531 | SLC6A3 | DB00721 | Procaine           | S | 1 | HA05 |
| Candidate Gene | 6531 | SLC6A3 | DB00745 | Modafinil          | N | 6 | BA07 |
| Candidate Gene | 6531 | SLC6A3 | DB00852 | Pseudoephedrine    | R | 1 | BA02 |
| Candidate Gene | 6531 | SLC6A3 | DB00907 | Cocaine            | N | 1 | BC01 |
| Candidate Gene | 6531 | SLC6A3 | DB00907 | Cocaine            | R | 2 | AD03 |
| Candidate Gene | 6531 | SLC6A3 | DB00907 | Cocaine            | S | 1 | HA01 |
| Candidate Gene | 6531 | SLC6A3 | DB00907 | Cocaine            | S | 2 | DA02 |
| Candidate Gene | 6531 | SLC6A3 | DB00937 | Diethylpropion     | A | 8 | AA03 |
| Candidate Gene | 6531 | SLC6A3 | DB00988 | Dopamine           | C | 1 | CA04 |
| Candidate Gene | 6531 | SLC6A3 | DB01104 | Sertraline         | N | 6 | AB06 |
| Candidate Gene | 6531 | SLC6A3 | DB01105 | Sibutramine        | A | 8 | AA10 |
| Candidate Gene | 6531 | SLC6A3 | DB01114 | Chlorphenamine     | R | 6 | AB02 |
| Candidate Gene | 6531 | SLC6A3 | DB01114 | Chlorphenamine     | R | 6 | AB04 |
| Candidate Gene | 6531 | SLC6A3 | DB01146 | Diphenylpyraline   | R | 6 | AA07 |
| Candidate Gene | 6531 | SLC6A3 | DB01146 | Diphenylpyraline   | V | 1 | AA02 |
| Candidate Gene | 6531 | SLC6A3 | DB01146 | Diphenylpyraline   | V | 1 | AA20 |
| Candidate Gene | 6531 | SLC6A3 | DB01149 | Nefazodone         | N | 6 | AX06 |
| Candidate Gene | 6531 | SLC6A3 | DB01156 | Bupropion          | N | 6 | AX12 |
| Candidate Gene | 6531 | SLC6A3 | DB01576 | Dextroamphetamine  | N | 6 | BA02 |
| Candidate Gene | 6531 | SLC6A3 | DB01577 | Methamphetamine    | N | 6 | BA03 |
| Candidate Gene | 6531 | SLC6A3 | DB04821 | Nomifensine        | N | 6 | AX04 |
| Candidate Gene | 6531 | SLC6A3 | DB06148 | Mianserin          | N | 6 | AX03 |
| Candidate Gene | 6531 | SLC6A3 | DB06701 | Dexmethylphenidate | N | 6 | BA11 |
| Candidate Gene | 6532 | SLC6A4 | DB00176 | Fluvoxamine        | N | 6 | AB08 |
| Candidate Gene | 6532 | SLC6A4 | DB00182 | Amphetamine        | N | 6 | BA01 |
| Candidate Gene | 6532 | SLC6A4 | DB00191 | Phentermine        | A | 8 | AA01 |
| Candidate Gene | 6532 | SLC6A4 | DB00193 | Tramadol           | N | 2 | AX02 |



|                |      |        |         |                  |   |   |      |
|----------------|------|--------|---------|------------------|---|---|------|
| Candidate Gene | 6532 | SLC6A4 | DB00215 | Citalopram       | N | 6 | AB04 |
| Candidate Gene | 6532 | SLC6A4 | DB00215 | Citalopram       | N | 6 | AB10 |
| Candidate Gene | 6532 | SLC6A4 | DB00285 | Venlafaxine      | N | 6 | AX16 |
| Candidate Gene | 6532 | SLC6A4 | DB00285 | Venlafaxine      | N | 6 | AX23 |
| Candidate Gene | 6532 | SLC6A4 | DB00289 | Atomoxetine      | N | 6 | BA09 |
| Candidate Gene | 6532 | SLC6A4 | DB00321 | Amitriptyline    | N | 6 | AA09 |
| Candidate Gene | 6532 | SLC6A4 | DB00344 | Protriptyline    | N | 6 | AA11 |
| Candidate Gene | 6532 | SLC6A4 | DB00370 | Mirtazapine      | N | 6 | AX11 |
| Candidate Gene | 6532 | SLC6A4 | DB00408 | Loxapine         | N | 5 | AH01 |
| Candidate Gene | 6532 | SLC6A4 | DB00422 | Methylphenidate  | N | 6 | BA04 |
| Candidate Gene | 6532 | SLC6A4 | DB00454 | Pethidine        | N | 2 | AB02 |
| Candidate Gene | 6532 | SLC6A4 | DB08002 | Imipramine       | N | 6 | AA02 |
| Candidate Gene | 6532 | SLC6A4 | DB08002 | Imipramine       | N | 6 | AA03 |
| Candidate Gene | 6532 | SLC6A4 | DB08002 | Imipramine       | N | 6 | AA06 |
| Candidate Gene | 6532 | SLC6A4 | DB00472 | Fluoxetine       | N | 6 | AB03 |
| Candidate Gene | 6532 | SLC6A4 | DB00476 | Duloxetine       | N | 6 | AX21 |
| Candidate Gene | 6532 | SLC6A4 | DB00514 | Dextromethorphan | R | 5 | DA09 |
| Candidate Gene | 6532 | SLC6A4 | DB00540 | Nortriptyline    | N | 6 | AA10 |
| Candidate Gene | 6532 | SLC6A4 | DB00543 | Amoxapine        | N | 6 | AA17 |
| Candidate Gene | 6532 | SLC6A4 | DB00574 | Fenfluramine     | A | 8 | AA02 |
| Candidate Gene | 6532 | SLC6A4 | DB00574 | Fenfluramine     | A | 8 | AA04 |
| Candidate Gene | 6532 | SLC6A4 | DB00579 | Mazindol         | A | 8 | AA05 |
| Candidate Gene | 6532 | SLC6A4 | DB00656 | Trazodone        | N | 6 | AX05 |
| Candidate Gene | 6532 | SLC6A4 | DB00661 | Verapamil        | C | 8 | DA01 |
| Candidate Gene | 6532 | SLC6A4 | DB00715 | Paroxetine       | N | 6 | AB05 |
| Candidate Gene | 6532 | SLC6A4 | DB00805 | Minaprine        | N | 6 | AX07 |
| Candidate Gene | 6532 | SLC6A4 | DB00852 | Pseudoephedrine  | R | 1 | BA02 |
| Candidate Gene | 6532 | SLC6A4 | DB00907 | Cocaine          | N | 1 | BC01 |
| Candidate Gene | 6532 | SLC6A4 | DB00907 | Cocaine          | R | 2 | AD03 |
| Candidate Gene | 6532 | SLC6A4 | DB00907 | Cocaine          | S | 1 | HA01 |
| Candidate Gene | 6532 | SLC6A4 | DB00907 | Cocaine          | S | 2 | DA02 |
| Candidate Gene | 6532 | SLC6A4 | DB00988 | Dopamine         | C | 1 | CA04 |
| Candidate Gene | 6532 | SLC6A4 | DB01104 | Sertraline       | N | 6 | AB06 |
| Candidate Gene | 6532 | SLC6A4 | DB01105 | Sibutramine      | A | 8 | AA10 |

|                  |      |        |         |                    |   |   |      |
|------------------|------|--------|---------|--------------------|---|---|------|
| Candidate Gene   | 6532 | SLC6A4 | DB01114 | Chlorphenamine     | R | 6 | AB02 |
| Candidate Gene   | 6532 | SLC6A4 | DB01114 | Chlorphenamine     | R | 6 | AB04 |
| Candidate Gene   | 6532 | SLC6A4 | DB01142 | Doxepin            | N | 6 | AA12 |
| Candidate Gene   | 6532 | SLC6A4 | DB01149 | Nefazodone         | N | 6 | AX06 |
| Candidate Gene   | 6532 | SLC6A4 | DB07682 | Desipramine        | N | 6 | AA01 |
| Candidate Gene   | 6532 | SLC6A4 | DB07600 | Clomipramine       | N | 6 | AA04 |
| Candidate Gene   | 6532 | SLC6A4 | DB01577 | Methamphetamine    | N | 6 | BA03 |
| Candidate Gene   | 6532 | SLC6A4 | DB04832 | Zimelidine         | N | 6 | AB02 |
| Candidate Gene   | 6532 | SLC6A4 | DB04836 | Amineptine         | N | 6 | AA19 |
| Candidate Gene   | 6532 | SLC6A4 | DB04896 | Milnacipran        | N | 6 | AX17 |
| Candidate Gene   | 6532 | SLC6A4 | DB06148 | Mianserin          | N | 6 | AX03 |
| Candidate Gene   | 6532 | SLC6A4 | DB06204 | Tapentadol         | N | 2 | AX06 |
| Candidate Gene   | 6532 | SLC6A4 | DB06701 | Dexmethylphenidate | N | 6 | BA11 |
| Candidate Gene   | 7124 | TNF    | DB00005 | Etanercept         | L | 4 | AB01 |
| Candidate Gene   | 7124 | TNF    | DB00051 | Adalimumab         | L | 4 | AB04 |
| Candidate Gene   | 7124 | TNF    | DB00065 | Infliximab         | L | 4 | AB02 |
| Candidate Gene   | 7124 | TNF    | DB00608 | Chloroquine        | P | 1 | BA01 |
| Candidate Gene   | 7124 | TNF    | DB00608 | Chloroquine        | P | 1 | BA02 |
| Candidate Gene   | 7124 | TNF    | DB00668 | Epinephrine        | A | 1 | AD01 |
| Candidate Gene   | 7124 | TNF    | DB00668 | Epinephrine        | B | 2 | BC09 |
| Candidate Gene   | 7124 | TNF    | DB00668 | Epinephrine        | C | 1 | CA24 |
| Candidate Gene   | 7124 | TNF    | DB00668 | Epinephrine        | R | 1 | AA14 |
| Candidate Gene   | 7124 | TNF    | DB00668 | Epinephrine        | R | 3 | AA01 |
| Candidate Gene   | 7124 | TNF    | DB00668 | Epinephrine        | S | 1 | EA01 |
| Candidate Gene   | 7124 | TNF    | DB00852 | Pseudoephedrine    | R | 1 | BA02 |
| Candidate Gene   | 7124 | TNF    | DB01041 | Thalidomide        | L | 4 | AX02 |
| Candidate Gene   | 7124 | TNF    | DB01407 | Clenbuterol        | R | 3 | AC14 |
| Candidate Gene   | 7124 | TNF    | DB01407 | Clenbuterol        | R | 3 | CC13 |
| Candidate Gene   | 7124 | TNF    | DB01411 | Pranlukast         | R | 3 | DC02 |
| Candidate Gene   | 7124 | TNF    | DB01427 | Amrinone           | C | 1 | CE01 |
| Candidate Gene   | 7124 | TNF    | DB04956 | Afelimomab         | L | 4 | AB03 |
| Candidate Gene   | 7124 | TNF    | DB06674 | golimumab          | L | 4 | AB06 |
| Candidate Gene   | 7124 | TNF    | DB08904 | Certolizumab pegol | L | 4 | AB05 |
| Known Interactor | 2    | A2M    | DB00102 | Becaplermin        | A | 1 | AD08 |

|                  |      |         |         |                |   |   |      |
|------------------|------|---------|---------|----------------|---|---|------|
| Known Interactor | 2    | A2M     | DB00102 | Becaplermin    | D | 3 | AX06 |
| Known Interactor | 2    | A2M     | DB00626 | Bacitracin     | D | 6 | AX05 |
| Known Interactor | 2    | A2M     | DB00626 | Bacitracin     | J | 1 | XX10 |
| Known Interactor | 2    | A2M     | DB00626 | Bacitracin     | R | 2 | AB04 |
| Known Interactor | 1636 | ACE     | DB00178 | Ramipril       | C | 9 | AA05 |
| Known Interactor | 1636 | ACE     | DB00492 | Fosinopril     | C | 9 | AA09 |
| Known Interactor | 1636 | ACE     | DB00519 | Trandolapril   | C | 9 | AA10 |
| Known Interactor | 1636 | ACE     | DB00542 | Benazepril     | C | 9 | AA07 |
| Known Interactor | 1636 | ACE     | DB00584 | Enalapril      | C | 9 | AA02 |
| Known Interactor | 1636 | ACE     | DB00691 | Moexipril      | C | 9 | AA13 |
| Known Interactor | 1636 | ACE     | DB00790 | Perindopril    | C | 9 | AA04 |
| Known Interactor | 1636 | ACE     | DB00881 | Quinapril      | C | 9 | AA06 |
| Known Interactor | 1636 | ACE     | DB01180 | Rescinnamine   | C | 2 | AA01 |
| Known Interactor | 1636 | ACE     | DB01197 | Captopril      | C | 9 | AA01 |
| Known Interactor | 1636 | ACE     | DB01340 | Cilazapril     | C | 9 | AA08 |
| Known Interactor | 1636 | ACE     | DB01348 | Spirapril      | C | 9 | AA11 |
| Known Interactor | 1636 | ACE     | DB08836 | Temocapril     | C | 9 | AA14 |
| Known Interactor | 135  | ADORA2A | DB00201 | Caffeine       | N | 2 | BE01 |
| Known Interactor | 135  | ADORA2A | DB00201 | Caffeine       | N | 6 | BC01 |
| Known Interactor | 135  | ADORA2A | DB00277 | Theophylline   | R | 3 | DA04 |
| Known Interactor | 135  | ADORA2A | DB00277 | Theophylline   | R | 3 | DA05 |
| Known Interactor | 135  | ADORA2A | DB00358 | Mefloquine     | P | 1 | BC02 |
| Known Interactor | 135  | ADORA2A | DB00640 | Adenosine      | C | 1 | EB10 |
| Known Interactor | 135  | ADORA2A | DB00651 | Dyphylline     | R | 3 | DA01 |
| Known Interactor | 135  | ADORA2A | DB00806 | Pentoxifylline | C | 4 | AD03 |
| Known Interactor | 135  | ADORA2A | DB01412 | Theobromine    | C | 3 | BD01 |
| Known Interactor | 135  | ADORA2A | DB01412 | Theobromine    | R | 3 | DA07 |
| Known Interactor | 135  | ADORA2A | DB04932 | Defibrotide    | B | 1 | AX01 |
| Known Interactor | 135  | ADORA2A | DB06213 | Regadenoson    | C | 1 | EB21 |
| Known Interactor | 26   | AOC1    | DB00594 | Amiloride      | C | 3 | DB01 |
| Known Interactor | 367  | AR      | DB00506 | Levonorgestrel | G | 3 | AC03 |
| Known Interactor | 367  | AR      | DB00506 | Levonorgestrel | G | 3 | AD01 |
| Known Interactor | 367  | AR      | DB00421 | Spirolactone   | C | 3 | DA01 |
| Known Interactor | 367  | AR      | DB00499 | Flutamide      | L | 2 | BB01 |

|                  |     |       |         |                           |   |    |      |
|------------------|-----|-------|---------|---------------------------|---|----|------|
| Known Interactor | 367 | AR    | DB00621 | Oxandrolone               | A | 14 | AA08 |
| Known Interactor | 367 | AR    | DB00624 | Testosterone              | G | 3  | BA02 |
| Known Interactor | 367 | AR    | DB00624 | Testosterone              | G | 3  | BA03 |
| Known Interactor | 367 | AR    | DB00624 | Testosterone              | G | 3  | EK01 |
| Known Interactor | 367 | AR    | DB00665 | Nilutamide                | L | 2  | BB02 |
| Known Interactor | 367 | AR    | DB02478 | Fludrocortisone           | H | 2  | AA02 |
| Known Interactor | 367 | AR    | DB00984 | Nandrolone phenpropionate | A | 14 | AB01 |
| Known Interactor | 367 | AR    | DB00984 | Nandrolone phenpropionate | S | 1  | XA11 |
| Known Interactor | 367 | AR    | DB01026 | Ketoconazole              | D | 1  | AC08 |
| Known Interactor | 367 | AR    | DB01026 | Ketoconazole              | G | 1  | AF11 |
| Known Interactor | 367 | AR    | DB01026 | Ketoconazole              | J | 2  | AB02 |
| Known Interactor | 367 | AR    | DB06284 | Bicalutamide              | L | 2  | BB03 |
| Known Interactor | 367 | AR    | DB01185 | Fluoxymesterone           | G | 3  | BA01 |
| Known Interactor | 367 | AR    | DB01406 | Danazol                   | G | 3  | XA01 |
| Known Interactor | 367 | AR    | DB02266 | Flufenamic Acid           | M | 1  | AG03 |
| Known Interactor | 367 | AR    | DB02901 | Dihydrotestosterone       | A | 14 | AA01 |
| Known Interactor | 367 | AR    | DB02901 | Dihydrotestosterone       | G | 3  | BB02 |
| Known Interactor | 367 | AR    | DB04839 | Cyproterone acetate       | G | 3  | HA01 |
| Known Interactor | 596 | BCL2  | DB01050 | Ibuprofen                 | C | 1  | EB16 |
| Known Interactor | 596 | BCL2  | DB01050 | Ibuprofen                 | G | 2  | CC01 |
| Known Interactor | 596 | BCL2  | DB01050 | Ibuprofen                 | M | 1  | AE01 |
| Known Interactor | 596 | BCL2  | DB01050 | Ibuprofen                 | M | 1  | AE14 |
| Known Interactor | 596 | BCL2  | DB01050 | Ibuprofen                 | M | 2  | AA13 |
| Known Interactor | 596 | BCL2  | DB05927 | Paclitaxel                | L | 1  | CD01 |
| Known Interactor | 596 | BCL2  | DB01248 | Docetaxel                 | L | 1  | CD02 |
| Known Interactor | 596 | BCL2  | DB01367 | Rasagiline                | N | 4  | BD02 |
| Known Interactor | 596 | BCL2  | DB05297 | DHA-paclitaxel            | L | 4  | AA26 |
| Known Interactor | 673 | BRAF  | DB07438 | Sorafenib                 | L | 1  | XE05 |
| Known Interactor | 673 | BRAF  | DB08881 | Vemurafenib               | L | 1  | XE15 |
| Known Interactor | 673 | BRAF  | DB08896 | Regorafenib               | L | 1  | XE21 |
| Known Interactor | 801 | CALM1 | DB00527 | Cinchocaine               | C | 5  | AD04 |
| Known Interactor | 801 | CALM1 | DB00527 | Cinchocaine               | D | 4  | AB02 |
| Known Interactor | 801 | CALM1 | DB00527 | Cinchocaine               | N | 1  | BB06 |
| Known Interactor | 801 | CALM1 | DB00527 | Cinchocaine               | S | 1  | HA06 |

|                  |     |       |         |                  |   |    |      |
|------------------|-----|-------|---------|------------------|---|----|------|
| Known Interactor | 801 | CALM1 | DB00527 | Cinchocaine      | S | 2  | DA04 |
| Known Interactor | 801 | CALM1 | DB00622 | Nicardipine      | C | 8  | CA04 |
| Known Interactor | 801 | CALM1 | DB00623 | Fluphenazine     | N | 5  | AB02 |
| Known Interactor | 801 | CALM1 | DB00753 | Isoflurane       | N | 1  | AB06 |
| Known Interactor | 801 | CALM1 | DB08616 | Trifluoperazine  | N | 5  | AB06 |
| Known Interactor | 801 | CALM1 | DB00836 | Loperamide       | A | 7  | DA03 |
| Known Interactor | 801 | CALM1 | DB00836 | Loperamide       | A | 7  | DA05 |
| Known Interactor | 801 | CALM1 | DB00850 | Perphenazine     | N | 5  | AB03 |
| Known Interactor | 801 | CALM1 | DB00925 | Phenoxybenzamine | C | 4  | AX02 |
| Known Interactor | 801 | CALM1 | DB01023 | Felodipine       | C | 8  | CA02 |
| Known Interactor | 801 | CALM1 | DB08189 | Melatonin        | N | 5  | CH01 |
| Known Interactor | 801 | CALM1 | DB01069 | Promethazine     | D | 4  | AA10 |
| Known Interactor | 801 | CALM1 | DB01069 | Promethazine     | R | 6  | AD02 |
| Known Interactor | 801 | CALM1 | DB01069 | Promethazine     | R | 6  | AD05 |
| Known Interactor | 801 | CALM1 | DB01100 | Pimozide         | N | 5  | AG02 |
| Known Interactor | 801 | CALM1 | DB01115 | Nifedipine       | C | 8  | CA05 |
| Known Interactor | 801 | CALM1 | DB01244 | Bepidil          | C | 8  | EA02 |
| Known Interactor | 801 | CALM1 | DB01373 | Calcium          | A | 2  | AC01 |
| Known Interactor | 801 | CALM1 | DB01373 | Calcium          | A | 2  | AC02 |
| Known Interactor | 801 | CALM1 | DB01373 | Calcium          | A | 6  | AC08 |
| Known Interactor | 801 | CALM1 | DB01373 | Calcium          | A | 7  | XA03 |
| Known Interactor | 801 | CALM1 | DB01373 | Calcium          | A | 11 | HA31 |
| Known Interactor | 801 | CALM1 | DB01373 | Calcium          | A | 12 | AA01 |
| Known Interactor | 801 | CALM1 | DB01373 | Calcium          | A | 12 | AA02 |
| Known Interactor | 801 | CALM1 | DB01373 | Calcium          | A | 12 | AA03 |
| Known Interactor | 801 | CALM1 | DB01373 | Calcium          | A | 12 | AA04 |
| Known Interactor | 801 | CALM1 | DB01373 | Calcium          | A | 12 | AA05 |
| Known Interactor | 801 | CALM1 | DB01373 | Calcium          | A | 12 | AA06 |
| Known Interactor | 801 | CALM1 | DB01373 | Calcium          | A | 12 | AA08 |
| Known Interactor | 801 | CALM1 | DB01373 | Calcium          | A | 12 | AA09 |
| Known Interactor | 801 | CALM1 | DB01373 | Calcium          | A | 12 | AA10 |
| Known Interactor | 801 | CALM1 | DB01373 | Calcium          | A | 12 | AA11 |
| Known Interactor | 801 | CALM1 | DB01373 | Calcium          | A | 12 | AA20 |
| Known Interactor | 801 | CALM1 | DB01373 | Calcium          | A | 12 | AA30 |

|                  |      |       |         |                       |   |    |      |
|------------------|------|-------|---------|-----------------------|---|----|------|
| Known Interactor | 801  | CALM1 | DB01373 | Calcium               | B | 1  | AC08 |
| Known Interactor | 801  | CALM1 | DB01373 | Calcium               | B | 2  | BC08 |
| Known Interactor | 801  | CALM1 | DB01373 | Calcium               | C | 5  | BX01 |
| Known Interactor | 801  | CALM1 | DB01373 | Calcium               | D | 3  | AX04 |
| Known Interactor | 801  | CALM1 | DB01373 | Calcium               | D | 11 | AX03 |
| Known Interactor | 801  | CALM1 | DB01373 | Calcium               | J | 4  | AA03 |
| Known Interactor | 801  | CALM1 | DB01373 | Calcium               | N | 2  | BA15 |
| Known Interactor | 801  | CALM1 | DB01373 | Calcium               | N | 7  | BB02 |
| Known Interactor | 801  | CALM1 | DB01373 | Calcium               | R | 1  | AX01 |
| Known Interactor | 801  | CALM1 | DB01373 | Calcium               | V | 3  | AE01 |
| Known Interactor | 801  | CALM1 | DB01373 | Calcium               | V | 3  | AF04 |
| Known Interactor | 801  | CALM1 | DB01373 | Calcium               | V | 8  | AC10 |
| Known Interactor | 801  | CALM1 | DB01429 | Aprindine             | C | 1  | BB04 |
| Known Interactor | 801  | CALM1 | DB04825 | Prenylamine           | C | 1  | DX02 |
| Known Interactor | 801  | CALM1 | DB04841 | Flunarizine           | N | 7  | CA03 |
| Known Interactor | 811  | CALR  | DB00025 | Antihemophilic Factor | B | 2  | BD02 |
| Known Interactor | 811  | CALR  | DB00031 | Tenecteplase          | B | 1  | AD11 |
| Known Interactor | 811  | CALR  | DB08189 | Melatonin             | N | 5  | CH01 |
| Known Interactor | 821  | CANX  | DB00025 | Antihemophilic Factor | B | 2  | BD02 |
| Known Interactor | 821  | CANX  | DB00031 | Tenecteplase          | B | 1  | AD11 |
| Known Interactor | 836  | CASP3 | DB01017 | Minocycline           | A | 1  | AB23 |
| Known Interactor | 836  | CASP3 | DB01017 | Minocycline           | J | 1  | AA08 |
| Known Interactor | 1363 | CPE   | DB01383 | Insulin Regular       | A | 10 | AB01 |
| Known Interactor | 1363 | CPE   | DB01383 | Insulin Regular       | A | 10 | AB03 |
| Known Interactor | 1363 | CPE   | DB01383 | Insulin Regular       | A | 10 | AB04 |
| Known Interactor | 1363 | CPE   | DB01383 | Insulin Regular       | A | 10 | AB05 |
| Known Interactor | 1363 | CPE   | DB01383 | Insulin Regular       | A | 10 | AC01 |
| Known Interactor | 1363 | CPE   | DB01383 | Insulin Regular       | A | 10 | AC03 |
| Known Interactor | 1363 | CPE   | DB01383 | Insulin Regular       | A | 10 | AD05 |
| Known Interactor | 1363 | CPE   | DB01383 | Insulin Regular       | A | 10 | AE04 |
| Known Interactor | 1363 | CPE   | DB01383 | Insulin Regular       | A | 10 | AE05 |
| Known Interactor | 1385 | CREB1 | DB01183 | Naloxone              | V | 3  | AB15 |
| Known Interactor | 1786 | DNMT1 | DB01099 | Flucytosine           | D | 1  | AE21 |
| Known Interactor | 1786 | DNMT1 | DB01099 | Flucytosine           | J | 2  | AX01 |

|                  |      |       |         |                      |   |   |      |
|------------------|------|-------|---------|----------------------|---|---|------|
| Known Interactor | 1950 | EGF   | DB00364 | Sucralfate           | A | 2 | BX02 |
| Known Interactor | 1956 | EGFR  | DB00002 | Cetuximab            | L | 1 | XC06 |
| Known Interactor | 1956 | EGFR  | DB00072 | Trastuzumab          | L | 1 | XC03 |
| Known Interactor | 1956 | EGFR  | DB05291 | Lidocaine            | A | 1 | AD11 |
| Known Interactor | 1956 | EGFR  | DB05291 | Lidocaine            | C | 1 | BB01 |
| Known Interactor | 1956 | EGFR  | DB05291 | Lidocaine            | C | 5 | AD01 |
| Known Interactor | 1956 | EGFR  | DB05291 | Lidocaine            | D | 4 | AB01 |
| Known Interactor | 1956 | EGFR  | DB05291 | Lidocaine            | N | 1 | BB02 |
| Known Interactor | 1956 | EGFR  | DB05291 | Lidocaine            | R | 2 | AD02 |
| Known Interactor | 1956 | EGFR  | DB05291 | Lidocaine            | S | 1 | HA07 |
| Known Interactor | 1956 | EGFR  | DB05291 | Lidocaine            | S | 2 | DA01 |
| Known Interactor | 1956 | EGFR  | DB07998 | Gefitinib            | L | 1 | XE02 |
| Known Interactor | 1956 | EGFR  | DB00530 | Erlotinib            | L | 1 | XE03 |
| Known Interactor | 1956 | EGFR  | DB02584 | Lapatinib            | L | 1 | XE07 |
| Known Interactor | 1956 | EGFR  | DB01269 | Panitumumab          | L | 1 | XC08 |
| Known Interactor | 1956 | EGFR  | DB05294 | Vandetanib           | L | 1 | XE12 |
| Known Interactor | 1956 | EGFR  | DB08916 | Afatinib             | L | 1 | XE13 |
| Known Interactor | 2064 | ERBB2 | DB00072 | Trastuzumab          | L | 1 | XC03 |
| Known Interactor | 2064 | ERBB2 | DB02584 | Lapatinib            | L | 1 | XE07 |
| Known Interactor | 2064 | ERBB2 | DB06366 | Pertuzumab           | L | 1 | XC13 |
| Known Interactor | 2064 | ERBB2 | DB08916 | Afatinib             | L | 1 | XE13 |
| Known Interactor | 2099 | ESR1  | DB00255 | Diethylstilbestrol   | G | 3 | CB02 |
| Known Interactor | 2099 | ESR1  | DB00255 | Diethylstilbestrol   | G | 3 | CC05 |
| Known Interactor | 2099 | ESR1  | DB00255 | Diethylstilbestrol   | L | 2 | AA01 |
| Known Interactor | 2099 | ESR1  | DB00269 | Chlorotrianisene     | G | 3 | CA06 |
| Known Interactor | 2099 | ESR1  | DB00286 | Conjugated Estrogens | G | 3 | CA57 |
| Known Interactor | 2099 | ESR1  | DB00294 | Etonogestrel         | G | 3 | AC08 |
| Known Interactor | 2099 | ESR1  | DB00304 | Desogestrel          | G | 3 | AC09 |
| Known Interactor | 2099 | ESR1  | DB00506 | Levonorgestrel       | G | 3 | AC03 |
| Known Interactor | 2099 | ESR1  | DB00506 | Levonorgestrel       | G | 3 | AD01 |
| Known Interactor | 2099 | ESR1  | DB00396 | Progesterone         | G | 3 | AC06 |
| Known Interactor | 2099 | ESR1  | DB00396 | Progesterone         | G | 3 | DA02 |
| Known Interactor | 2099 | ESR1  | DB00396 | Progesterone         | G | 3 | DA03 |
| Known Interactor | 2099 | ESR1  | DB00396 | Progesterone         | G | 3 | DA04 |

|                  |      |      |         |                        |   |    |      |
|------------------|------|------|---------|------------------------|---|----|------|
| Known Interactor | 2099 | ESR1 | DB00396 | Progesterone           | L | 2  | AB02 |
| Known Interactor | 2099 | ESR1 | DB00481 | Raloxifene             | G | 3  | XC01 |
| Known Interactor | 2099 | ESR1 | DB00539 | Toremifene             | L | 2  | BA02 |
| Known Interactor | 2099 | ESR1 | DB00655 | Estrone                | G | 3  | CA07 |
| Known Interactor | 2099 | ESR1 | DB00655 | Estrone                | G | 3  | CC04 |
| Known Interactor | 2099 | ESR1 | DB00675 | Tamoxifen              | L | 2  | BA01 |
| Known Interactor | 2099 | ESR1 | DB00783 | Estradiol              | G | 3  | CA01 |
| Known Interactor | 2099 | ESR1 | DB00783 | Estradiol              | G | 3  | CA03 |
| Known Interactor | 2099 | ESR1 | DB00783 | Estradiol              | L | 2  | AA02 |
| Known Interactor | 2099 | ESR1 | DB00783 | Estradiol              | L | 2  | AA03 |
| Known Interactor | 2099 | ESR1 | DB00882 | Clomifene              | G | 3  | GB02 |
| Known Interactor | 2099 | ESR1 | DB00890 | Dienestrol             | G | 3  | CB01 |
| Known Interactor | 2099 | ESR1 | DB00890 | Dienestrol             | G | 3  | CC02 |
| Known Interactor | 2099 | ESR1 | DB00947 | Fulvestrant            | L | 2  | BA03 |
| Known Interactor | 2099 | ESR1 | DB00957 | Norgestimate           | G | 3  | AA11 |
| Known Interactor | 2099 | ESR1 | DB08189 | Melatonin              | N | 5  | CH01 |
| Known Interactor | 2099 | ESR1 | DB01108 | Trilostane             | H | 2  | CA01 |
| Known Interactor | 2099 | ESR1 | DB01183 | Naloxone               | V | 3  | AB15 |
| Known Interactor | 2099 | ESR1 | DB01185 | Fluoxymesterone        | G | 3  | BA01 |
| Known Interactor | 2099 | ESR1 | DB01196 | Estramustine           | L | 1  | XX11 |
| Known Interactor | 2099 | ESR1 | DB01406 | Danazol                | G | 3  | XA01 |
| Known Interactor | 2099 | ESR1 | DB01431 | Allylestrenol          | G | 3  | DC01 |
| Known Interactor | 2099 | ESR1 | DB06593 | Dehydroepiandrosterone | A | 14 | AA07 |
| Known Interactor | 2099 | ESR1 | DB05375 | Estriol                | G | 3  | CA04 |
| Known Interactor | 2099 | ESR1 | DB05375 | Estriol                | G | 3  | CC06 |
| Known Interactor | 2100 | ESR2 | DB00255 | Diethylstilbestrol     | G | 3  | CB02 |
| Known Interactor | 2100 | ESR2 | DB00255 | Diethylstilbestrol     | G | 3  | CC05 |
| Known Interactor | 2100 | ESR2 | DB00255 | Diethylstilbestrol     | L | 2  | AA01 |
| Known Interactor | 2100 | ESR2 | DB00481 | Raloxifene             | G | 3  | XC01 |
| Known Interactor | 2100 | ESR2 | DB00675 | Tamoxifen              | L | 2  | BA01 |
| Known Interactor | 2100 | ESR2 | DB00783 | Estradiol              | G | 3  | CA01 |
| Known Interactor | 2100 | ESR2 | DB00783 | Estradiol              | G | 3  | CA03 |
| Known Interactor | 2100 | ESR2 | DB00783 | Estradiol              | L | 2  | AA02 |
| Known Interactor | 2100 | ESR2 | DB00783 | Estradiol              | L | 2  | AA03 |



|                  |      |        |         |                        |   |    |      |
|------------------|------|--------|---------|------------------------|---|----|------|
| Known Interactor | 2100 | ESR2   | DB01108 | Trilostane             | H | 2  | CA01 |
| Known Interactor | 2100 | ESR2   | DB01196 | Estramustine           | L | 1  | XX11 |
| Known Interactor | 2100 | ESR2   | DB06593 | Dehydroepiandrosterone | A | 14 | AA07 |
| Known Interactor | 2100 | ESR2   | DB05375 | Estriol                | G | 3  | CA04 |
| Known Interactor | 2100 | ESR2   | DB05375 | Estriol                | G | 3  | CC06 |
| Known Interactor | 2534 | FYN    | DB01254 | Dasatinib              | L | 1  | XE06 |
| Known Interactor | 2550 | GABBR1 | DB00181 | Baclofen               | M | 3  | BX01 |
| Known Interactor | 2550 | GABBR1 | DB00837 | Progabide              | N | 3  | AG05 |
| Known Interactor | 2550 | GABBR1 | DB01080 | Vigabatrin             | N | 3  | AG04 |
| Known Interactor | 2554 | GABRA1 | DB00186 | Lorazepam              | N | 5  | BA06 |
| Known Interactor | 2554 | GABRA1 | DB00189 | Ethchlorvynol          | N | 5  | CM08 |
| Known Interactor | 2554 | GABRA1 | DB00228 | Enflurane              | N | 1  | AB04 |
| Known Interactor | 2554 | GABRA1 | DB00231 | Temazepam              | N | 5  | CD07 |
| Known Interactor | 2554 | GABRA1 | DB00273 | Topiramate             | N | 3  | AX11 |
| Known Interactor | 2554 | GABRA1 | DB00292 | Etomidate              | N | 1  | AX07 |
| Known Interactor | 2554 | GABRA1 | DB00306 | Talbutal               | N | 5  | CA07 |
| Known Interactor | 2554 | GABRA1 | DB00312 | Pentobarbital          | N | 5  | CA01 |
| Known Interactor | 2554 | GABRA1 | DB00334 | Olanzapine             | N | 5  | AH03 |
| Known Interactor | 2554 | GABRA1 | DB00349 | Clobazam               | N | 5  | BA09 |
| Known Interactor | 2554 | GABRA1 | DB00371 | Meprobamate            | N | 5  | BC01 |
| Known Interactor | 2554 | GABRA1 | DB00402 | Eszopiclone            | N | 5  | CF04 |
| Known Interactor | 2554 | GABRA1 | DB00404 | Alprazolam             | N | 5  | BA12 |
| Known Interactor | 2554 | GABRA1 | DB00418 | Secobarbital           | N | 5  | CA06 |
| Known Interactor | 2554 | GABRA1 | DB00425 | Zolpidem               | N | 5  | CF02 |
| Known Interactor | 2554 | GABRA1 | DB00463 | Metharbital            | N | 3  | AA30 |
| Known Interactor | 2554 | GABRA1 | DB00474 | Methohexital           | N | 1  | AF01 |
| Known Interactor | 2554 | GABRA1 | DB00474 | Methohexital           | N | 5  | CA15 |
| Known Interactor | 2554 | GABRA1 | DB00475 | Chlordiazepoxide       | N | 5  | BA02 |
| Known Interactor | 2554 | GABRA1 | DB00543 | Amoxapine              | N | 6  | AA17 |
| Known Interactor | 2554 | GABRA1 | DB00546 | Adinazolam             | N | 5  | BA07 |
| Known Interactor | 2554 | GABRA1 | DB00599 | Thiopental             | N | 1  | AF03 |
| Known Interactor | 2554 | GABRA1 | DB00599 | Thiopental             | N | 5  | CA19 |
| Known Interactor | 2554 | GABRA1 | DB00628 | Clorazepate            | N | 5  | BA05 |
| Known Interactor | 2554 | GABRA1 | DB00659 | Acamprosate            | N | 7  | BB03 |

|                  |      |        |         |                     |   |   |      |
|------------------|------|--------|---------|---------------------|---|---|------|
| Known Interactor | 2554 | GABRA1 | DB00683 | Midazolam           | N | 5 | CD08 |
| Known Interactor | 2554 | GABRA1 | DB00690 | Flurazepam          | N | 5 | CD01 |
| Known Interactor | 2554 | GABRA1 | DB00753 | Isoflurane          | N | 1 | AB06 |
| Known Interactor | 2554 | GABRA1 | DB00794 | Primidone           | D | 8 | AC04 |
| Known Interactor | 2554 | GABRA1 | DB00794 | Primidone           | N | 3 | AA03 |
| Known Interactor | 2554 | GABRA1 | DB00794 | Primidone           | R | 1 | AX07 |
| Known Interactor | 2554 | GABRA1 | DB00794 | Primidone           | R | 2 | AA18 |
| Known Interactor | 2554 | GABRA1 | DB00794 | Primidone           | S | 1 | AX08 |
| Known Interactor | 2554 | GABRA1 | DB00794 | Primidone           | S | 3 | AA05 |
| Known Interactor | 2554 | GABRA1 | DB00801 | Halazepam           | N | 5 | BA13 |
| Known Interactor | 2554 | GABRA1 | DB05893 | Propofol            | N | 1 | AX10 |
| Known Interactor | 2554 | GABRA1 | DB07699 | Diazepam            | N | 5 | BA01 |
| Known Interactor | 2554 | GABRA1 | DB07699 | Diazepam            | N | 5 | BA17 |
| Known Interactor | 2554 | GABRA1 | DB00837 | Progabide           | N | 3 | AG05 |
| Known Interactor | 2554 | GABRA1 | DB00842 | Oxazepam            | N | 5 | BA04 |
| Known Interactor | 2554 | GABRA1 | DB00849 | Methylphenobarbital | N | 3 | AA01 |
| Known Interactor | 2554 | GABRA1 | DB00897 | Triazolam           | N | 5 | CD05 |
| Known Interactor | 2554 | GABRA1 | DB00898 | Ethanol             | D | 1 | AE06 |
| Known Interactor | 2554 | GABRA1 | DB00898 | Ethanol             | D | 8 | AX08 |
| Known Interactor | 2554 | GABRA1 | DB00898 | Ethanol             | V | 3 | AB16 |
| Known Interactor | 2554 | GABRA1 | DB00898 | Ethanol             | V | 3 | AZ01 |
| Known Interactor | 2554 | GABRA1 | DB00962 | Zaleplon            | N | 5 | CF03 |
| Known Interactor | 2554 | GABRA1 | DB01028 | Methoxyflurane      | N | 2 | BG09 |
| Known Interactor | 2554 | GABRA1 | DB01287 | Ergoloid mesylate   | C | 4 | AE01 |
| Known Interactor | 2554 | GABRA1 | DB01068 | Clonazepam          | N | 3 | AE01 |
| Known Interactor | 2554 | GABRA1 | DB01107 | Methyprylon         | N | 5 | CE02 |
| Known Interactor | 2554 | GABRA1 | DB02330 | Halothane           | N | 1 | AB01 |
| Known Interactor | 2554 | GABRA1 | DB01174 | Phenobarbital       | N | 3 | AA02 |
| Known Interactor | 2554 | GABRA1 | DB01189 | Desflurane          | N | 1 | AB07 |
| Known Interactor | 2554 | GABRA1 | DB01198 | Zopiclone           | N | 5 | CF01 |
| Known Interactor | 2554 | GABRA1 | DB01205 | Flumazenil          | V | 3 | AB25 |
| Known Interactor | 2554 | GABRA1 | DB01215 | Estazolam           | N | 5 | CD04 |
| Known Interactor | 2554 | GABRA1 | DB01236 | Sevoflurane         | N | 1 | AB08 |
| Known Interactor | 2554 | GABRA1 | DB01351 | Amobarbital         | N | 5 | CA02 |

|                  |      |        |         |                        |   |    |      |
|------------------|------|--------|---------|------------------------|---|----|------|
| Known Interactor | 2554 | GABRA1 | DB01352 | Aprobarbital           | N | 5  | CA05 |
| Known Interactor | 2554 | GABRA1 | DB01354 | Heptabarbital          | N | 5  | CA11 |
| Known Interactor | 2554 | GABRA1 | DB01355 | Hexobarbital           | N | 1  | AF02 |
| Known Interactor | 2554 | GABRA1 | DB01355 | Hexobarbital           | N | 5  | CA16 |
| Known Interactor | 2554 | GABRA1 | DB01381 | Ginkgo biloba          | N | 6  | DX02 |
| Known Interactor | 2554 | GABRA1 | DB01437 | Glutethimide           | N | 5  | CE01 |
| Known Interactor | 2554 | GABRA1 | DB01558 | Bromazepam             | N | 5  | BA08 |
| Known Interactor | 2554 | GABRA1 | DB01587 | Ketazolam              | N | 5  | BA10 |
| Known Interactor | 2554 | GABRA1 | DB01588 | Prazepam               | N | 5  | BA11 |
| Known Interactor | 2554 | GABRA1 | DB01589 | Quazepam               | N | 5  | CD10 |
| Known Interactor | 2554 | GABRA1 | DB01594 | Cinolazepam            | N | 5  | CD13 |
| Known Interactor | 2554 | GABRA1 | DB01595 | Nitrazepam             | N | 5  | CD02 |
| Known Interactor | 2554 | GABRA1 | DB06593 | Dehydroepiandrosterone | A | 14 | AA07 |
| Known Interactor | 2752 | GLUL   | DB00130 | L-Glutamine            | A | 16 | AA03 |
| Known Interactor | 2752 | GLUL   | DB00142 | L-Glutamic Acid        | A | 9  | AB01 |
| Known Interactor | 2891 | GRIA2  | DB00142 | L-Glutamic Acid        | A | 9  | AB01 |
| Known Interactor | 2891 | GRIA2  | DB00306 | Talbutal               | N | 5  | CA07 |
| Known Interactor | 2891 | GRIA2  | DB00312 | Pentobarbital          | N | 5  | CA01 |
| Known Interactor | 2891 | GRIA2  | DB00418 | Secobarbital           | N | 5  | CA06 |
| Known Interactor | 2891 | GRIA2  | DB00463 | Metharbital            | N | 3  | AA30 |
| Known Interactor | 2891 | GRIA2  | DB00599 | Thiopental             | N | 1  | AF03 |
| Known Interactor | 2891 | GRIA2  | DB00599 | Thiopental             | N | 5  | CA19 |
| Known Interactor | 2891 | GRIA2  | DB00794 | Primidone              | D | 8  | AC04 |
| Known Interactor | 2891 | GRIA2  | DB00794 | Primidone              | N | 3  | AA03 |
| Known Interactor | 2891 | GRIA2  | DB00794 | Primidone              | R | 1  | AX07 |
| Known Interactor | 2891 | GRIA2  | DB00794 | Primidone              | R | 2  | AA18 |
| Known Interactor | 2891 | GRIA2  | DB00794 | Primidone              | S | 1  | AX08 |
| Known Interactor | 2891 | GRIA2  | DB00794 | Primidone              | S | 3  | AA05 |
| Known Interactor | 2891 | GRIA2  | DB00849 | Methylphenobarbital    | N | 3  | AA01 |
| Known Interactor | 2891 | GRIA2  | DB01174 | Phenobarbital          | N | 3  | AA02 |
| Known Interactor | 2891 | GRIA2  | DB01351 | Amobarbital            | N | 5  | CA02 |
| Known Interactor | 2891 | GRIA2  | DB01352 | Aprobarbital           | N | 5  | CA05 |
| Known Interactor | 2891 | GRIA2  | DB01354 | Heptabarbital          | N | 5  | CA11 |
| Known Interactor | 2891 | GRIA2  | DB01355 | Hexobarbital           | N | 1  | AF02 |

|                  |       |          |         |                       |   |    |      |
|------------------|-------|----------|---------|-----------------------|---|----|------|
| Known Interactor | 2891  | GRIA2    | DB01355 | Hexobarbital          | N | 5  | CA16 |
| Known Interactor | 2891  | GRIA2    | DB04599 | Aniracetam            | N | 6  | BX11 |
| Known Interactor | 2932  | GSK3B    | DB01356 | Lithium               | D | 11 | AX04 |
| Known Interactor | 2932  | GSK3B    | DB01356 | Lithium               | N | 5  | AN01 |
| Known Interactor | 3320  | HSP90AA1 | DB00615 | Rifabutin             | J | 4  | AB04 |
| Known Interactor | 3320  | HSP90AA1 | DB00716 | Nedocromil            | R | 1  | AC07 |
| Known Interactor | 3320  | HSP90AA1 | DB00716 | Nedocromil            | R | 3  | BC03 |
| Known Interactor | 3320  | HSP90AA1 | DB00716 | Nedocromil            | S | 1  | GX04 |
| Known Interactor | 3458  | IFNG     | DB01250 | Olsalazine            | A | 7  | EC03 |
| Known Interactor | 3551  | IKBKB    | DB00244 | Mesalazine            | A | 7  | EC02 |
| Known Interactor | 3551  | IKBKB    | DB08518 | Sulfasalazine         | A | 7  | EC01 |
| Known Interactor | 3551  | IKBKB    | DB00945 | Acetylsalicylic acid  | A | 1  | AD05 |
| Known Interactor | 3551  | IKBKB    | DB00945 | Acetylsalicylic acid  | B | 1  | AC06 |
| Known Interactor | 3551  | IKBKB    | DB00945 | Acetylsalicylic acid  | N | 2  | BA01 |
| Known Interactor | 3551  | IKBKB    | DB00995 | Auranofin             | M | 1  | CB03 |
| Known Interactor | 3551  | IKBKB    | DB01169 | Arsenic trioxide      | L | 1  | XX27 |
| Known Interactor | 3615  | IMPDH2   | DB00688 | Mycophenolate mofetil | L | 4  | AA06 |
| Known Interactor | 3615  | IMPDH2   | DB01033 | Mercaptopurine        | L | 1  | BB02 |
| Known Interactor | 3690  | ITGB3    | DB00054 | Abciximab             | B | 1  | AC13 |
| Known Interactor | 3690  | ITGB3    | DB00063 | Eptifibatide          | B | 1  | AC16 |
| Known Interactor | 3690  | ITGB3    | DB00775 | Tirofiban             | B | 1  | AC17 |
| Known Interactor | 3717  | JAK2     | DB08877 | Ruxolitinib           | L | 1  | XE18 |
| Known Interactor | 3717  | JAK2     | DB08895 | Tofacitinib           | L | 4  | AA29 |
| Known Interactor | 3763  | KCNJ6    | DB02330 | Halothane             | N | 1  | AB01 |
| Known Interactor | 56479 | KCNQ5    | DB04953 | Ezogabine             | N | 3  | AX21 |
| Known Interactor | 3949  | LDLR     | DB00707 | Porfimer              | L | 1  | XD01 |
| Known Interactor | 4035  | LRP1     | DB00025 | Antihemophilic Factor | B | 2  | BD02 |
| Known Interactor | 4035  | LRP1     | DB00031 | Tenecteplase          | B | 1  | AD11 |
| Known Interactor | 4035  | LRP1     | DB00100 | Coagulation Factor IX | B | 2  | BD04 |
| Known Interactor | 4036  | LRP2     | DB00013 | Urokinase             | B | 1  | AD04 |
| Known Interactor | 4036  | LRP2     | DB01383 | Insulin Regular       | A | 10 | AB01 |
| Known Interactor | 4036  | LRP2     | DB01383 | Insulin Regular       | A | 10 | AB03 |
| Known Interactor | 4036  | LRP2     | DB01383 | Insulin Regular       | A | 10 | AB04 |
| Known Interactor | 4036  | LRP2     | DB01383 | Insulin Regular       | A | 10 | AB05 |

|                  |      |        |         |                      |   |    |      |
|------------------|------|--------|---------|----------------------|---|----|------|
| Known Interactor | 4036 | LRP2   | DB01383 | Insulin Regular      | A | 10 | AC01 |
| Known Interactor | 4036 | LRP2   | DB01383 | Insulin Regular      | A | 10 | AC03 |
| Known Interactor | 4036 | LRP2   | DB01383 | Insulin Regular      | A | 10 | AD05 |
| Known Interactor | 4036 | LRP2   | DB01383 | Insulin Regular      | A | 10 | AE04 |
| Known Interactor | 4036 | LRP2   | DB01383 | Insulin Regular      | A | 10 | AE05 |
| Known Interactor | 4036 | LRP2   | DB00798 | Gentamicin           | D | 6  | AX07 |
| Known Interactor | 4036 | LRP2   | DB00798 | Gentamicin           | J | 1  | GB03 |
| Known Interactor | 4036 | LRP2   | DB00798 | Gentamicin           | S | 1  | AA11 |
| Known Interactor | 4036 | LRP2   | DB00798 | Gentamicin           | S | 2  | AA14 |
| Known Interactor | 4036 | LRP2   | DB00798 | Gentamicin           | S | 3  | AA06 |
| Known Interactor | 4130 | MAP1A  | DB01196 | Estramustine         | L | 1  | XX11 |
| Known Interactor | 4133 | MAP2   | DB01196 | Estramustine         | L | 1  | XX11 |
| Known Interactor | 4133 | MAP2   | DB05927 | Paclitaxel           | L | 1  | CD01 |
| Known Interactor | 4133 | MAP2   | DB01248 | Docetaxel            | L | 1  | CD02 |
| Known Interactor | 4137 | MAPT   | DB05927 | Paclitaxel           | L | 1  | CD01 |
| Known Interactor | 4137 | MAPT   | DB01248 | Docetaxel            | L | 1  | CD02 |
| Known Interactor | 2206 | MS4A2  | DB00043 | Omalizumab           | R | 3  | DX05 |
| Known Interactor | 2475 | MTOR   | DB00337 | Pimecrolimus         | D | 11 | AH02 |
| Known Interactor | 2475 | MTOR   | DB02439 | Sirolimus            | L | 4  | AA10 |
| Known Interactor | 2475 | MTOR   | DB01590 | Everolimus           | L | 1  | XE10 |
| Known Interactor | 2475 | MTOR   | DB01590 | Everolimus           | L | 4  | AA18 |
| Known Interactor | 2475 | MTOR   | DB06287 | Temsirolimus         | L | 1  | XE09 |
| Known Interactor | 4792 | NFKBIA | DB00945 | Acetylsalicylic acid | A | 1  | AD05 |
| Known Interactor | 4792 | NFKBIA | DB00945 | Acetylsalicylic acid | B | 1  | AC06 |
| Known Interactor | 4792 | NFKBIA | DB00945 | Acetylsalicylic acid | N | 2  | BA01 |
| Known Interactor | 4846 | NOS3   | DB00125 | L-Arginine           | B | 5  | XB01 |
| Known Interactor | 4846 | NOS3   | DB00360 | Tetrahydrobiopterin  | A | 16 | AX07 |
| Known Interactor | 4846 | NOS3   | DB01110 | Miconazole           | A | 1  | AB09 |
| Known Interactor | 4846 | NOS3   | DB01110 | Miconazole           | A | 7  | AC01 |
| Known Interactor | 4846 | NOS3   | DB01110 | Miconazole           | D | 1  | AC02 |
| Known Interactor | 4846 | NOS3   | DB01110 | Miconazole           | G | 1  | AF04 |
| Known Interactor | 4846 | NOS3   | DB01110 | Miconazole           | J | 2  | AB01 |
| Known Interactor | 4846 | NOS3   | DB01110 | Miconazole           | S | 2  | AA13 |
| Known Interactor | 5140 | PDE3B  | DB00201 | Caffeine             | N | 2  | BE01 |

|                  |      |        |         |                      |   |    |      |
|------------------|------|--------|---------|----------------------|---|----|------|
| Known Interactor | 5140 | PDE3B  | DB00201 | Caffeine             | N | 6  | BC01 |
| Known Interactor | 5142 | PDE4B  | DB00201 | Caffeine             | N | 2  | BE01 |
| Known Interactor | 5142 | PDE4B  | DB00201 | Caffeine             | N | 6  | BC01 |
| Known Interactor | 5142 | PDE4B  | DB00277 | Theophylline         | R | 3  | DA04 |
| Known Interactor | 5142 | PDE4B  | DB00277 | Theophylline         | R | 3  | DA05 |
| Known Interactor | 5142 | PDE4B  | DB00651 | Dyphylline           | R | 3  | DA01 |
| Known Interactor | 5142 | PDE4B  | DB00806 | Pentoxifylline       | C | 4  | AD03 |
| Known Interactor | 5142 | PDE4B  | DB00920 | Ketotifen            | R | 6  | AX17 |
| Known Interactor | 5142 | PDE4B  | DB00920 | Ketotifen            | S | 1  | GX08 |
| Known Interactor | 5142 | PDE4B  | DB01088 | Iloprost             | B | 1  | AC11 |
| Known Interactor | 5142 | PDE4B  | DB07725 | Papaverine           | A | 3  | AD01 |
| Known Interactor | 5142 | PDE4B  | DB07725 | Papaverine           | G | 4  | BE02 |
| Known Interactor | 5142 | PDE4B  | DB01412 | Theobromine          | C | 3  | BD01 |
| Known Interactor | 5142 | PDE4B  | DB01412 | Theobromine          | R | 3  | DA07 |
| Known Interactor | 5142 | PDE4B  | DB01427 | Amrinone             | C | 1  | CE01 |
| Known Interactor | 5142 | PDE4B  | DB01656 | Roflumilast          | R | 3  | DX07 |
| Known Interactor | 5142 | PDE4B  | DB05266 | Ibudilast            | R | 3  | DC04 |
| Known Interactor | 5170 | PDPK1  | DB00482 | Celecoxib            | L | 1  | XX33 |
| Known Interactor | 5170 | PDPK1  | DB00482 | Celecoxib            | M | 1  | AH01 |
| Known Interactor | 5295 | PIK3R1 | DB01064 | Isoprenaline         | C | 1  | CA02 |
| Known Interactor | 5295 | PIK3R1 | DB01064 | Isoprenaline         | D | 8  | AX05 |
| Known Interactor | 5515 | PPP2CA | DB00163 | Vitamin E            | A | 11 | HA03 |
| Known Interactor | 5553 | PRG2   | DB00020 | Sargramostim         | L | 3  | AA09 |
| Known Interactor | 5565 | PRKAB2 | DB00945 | Acetylsalicylic acid | A | 1  | AD05 |
| Known Interactor | 5565 | PRKAB2 | DB00945 | Acetylsalicylic acid | B | 1  | AC06 |
| Known Interactor | 5565 | PRKAB2 | DB00945 | Acetylsalicylic acid | N | 2  | BA01 |
| Known Interactor | 5588 | PRKCQ  | DB00675 | Tamoxifen            | L | 2  | BA01 |
| Known Interactor | 5591 | PRKDC  | DB00201 | Caffeine             | N | 2  | BE01 |
| Known Interactor | 5591 | PRKDC  | DB00201 | Caffeine             | N | 6  | BC01 |
| Known Interactor | 5621 | PRNP   | DB00759 | Tetracycline         | A | 1  | AB13 |
| Known Interactor | 5621 | PRNP   | DB00759 | Tetracycline         | A | 1  | AB21 |
| Known Interactor | 5621 | PRNP   | DB00759 | Tetracycline         | D | 6  | AA02 |
| Known Interactor | 5621 | PRNP   | DB00759 | Tetracycline         | D | 6  | AA04 |
| Known Interactor | 5621 | PRNP   | DB00759 | Tetracycline         | J | 1  | AA03 |

|                  |        |          |         |                  |   |    |      |
|------------------|--------|----------|---------|------------------|---|----|------|
| Known Interactor | 5621   | PRNP     | DB00759 | Tetracycline     | J | 1  | AA07 |
| Known Interactor | 5621   | PRNP     | DB00759 | Tetracycline     | J | 1  | AA09 |
| Known Interactor | 5621   | PRNP     | DB00759 | Tetracycline     | S | 1  | AA02 |
| Known Interactor | 5621   | PRNP     | DB00759 | Tetracycline     | S | 1  | AA09 |
| Known Interactor | 5621   | PRNP     | DB00759 | Tetracycline     | S | 2  | AA08 |
| Known Interactor | 5621   | PRNP     | DB00759 | Tetracycline     | S | 3  | AA02 |
| Known Interactor | 5770   | PTPN1    | DB01133 | Tiludronate      | M | 5  | BA05 |
| Known Interactor | 5879   | RAC1     | DB00514 | Dextromethorphan | R | 5  | DA09 |
| Known Interactor | 5894   | RAF1     | DB07438 | Sorafenib        | L | 1  | XE05 |
| Known Interactor | 5894   | RAF1     | DB08896 | Regorafenib      | L | 1  | XE21 |
| Known Interactor | 5914   | RARA     | DB00210 | Adapalene        | D | 10 | AD03 |
| Known Interactor | 5914   | RARA     | DB00459 | Acitretin        | D | 5  | BB02 |
| Known Interactor | 5914   | RARA     | DB00523 | Alitretinoin     | D | 11 | AH04 |
| Known Interactor | 5914   | RARA     | DB00523 | Alitretinoin     | L | 1  | XX22 |
| Known Interactor | 5914   | RARA     | DB00799 | Tazarotene       | D | 5  | AX05 |
| Known Interactor | 5914   | RARA     | DB00926 | Etretinate       | D | 5  | BB01 |
| Known Interactor | 6383   | SDC2     | DB00020 | Sargramostim     | L | 3  | AA09 |
| Known Interactor | 6755   | SSTR5    | DB00104 | Octreotide       | H | 1  | CB02 |
| Known Interactor | 6755   | SSTR5    | DB04894 | Vapreotide       | H | 1  | CB04 |
| Known Interactor | 6755   | SSTR5    | DB06663 | Pasireotide      | H | 1  | CB05 |
| Known Interactor | 7015   | TERT     | DB00495 | Zidovudine       | J | 5  | AF01 |
| Known Interactor | 7133   | TNFRSF1B | DB00005 | Etanercept       | L | 4  | AB01 |
| Known Interactor | 8600   | TNFSF11  | DB00480 | Lenalidomide     | L | 4  | AX04 |
| Known Interactor | 8600   | TNFSF11  | DB06643 | Denosumab        | M | 5  | BX04 |
| Known Interactor | 203068 | TUBB     | DB00361 | Vinorelbine      | L | 1  | CA04 |
| Known Interactor | 203068 | TUBB     | DB00541 | Vincristine      | L | 1  | CA02 |
| Known Interactor | 203068 | TUBB     | DB00570 | Vinblastine      | L | 1  | CA01 |
| Known Interactor | 203068 | TUBB     | DB08417 | Podofilox        | D | 6  | BB04 |
| Known Interactor | 203068 | TUBB     | DB01394 | Colchicine       | M | 4  | AC01 |
| Known Interactor | 7422   | VEGFA    | DB00112 | Bevacizumab      | L | 1  | XC07 |
| Known Interactor | 7422   | VEGFA    | DB01017 | Minocycline      | A | 1  | AB23 |
| Known Interactor | 7422   | VEGFA    | DB01017 | Minocycline      | J | 1  | AA08 |
| Known Interactor | 7422   | VEGFA    | DB01120 | Gliclazide       | A | 10 | BB09 |
| Known Interactor | 7422   | VEGFA    | DB01136 | Carvedilol       | C | 7  | AG02 |

|                  |       |         |         |               |   |    |      |
|------------------|-------|---------|---------|---------------|---|----|------|
| Known Interactor | 7422  | VEGFA   | DB01270 | Ranibizumab   | S | 1  | LA04 |
| Known Interactor | 7422  | VEGFA   | DB05294 | Vandetanib    | L | 1  | XE12 |
| Known Interactor | 7422  | VEGFA   | DB06779 | Dalteparin    | B | 1  | AB04 |
| Known Interactor | 7422  | VEGFA   | DB08885 | Aflibercept   | S | 1  | LA05 |
| Known Interactor | 79001 | VKORC1  | DB00170 | Menadiione    | B | 2  | BA02 |
| Known Interactor | 79001 | VKORC1  | DB00266 | Dicoumarol    | B | 1  | AA01 |
| Known Interactor | 79001 | VKORC1  | DB00498 | Phenindione   | B | 1  | AA02 |
| Known Interactor | 79001 | VKORC1  | DB00682 | Warfarin      | B | 1  | AA03 |
| Known Interactor | 79001 | VKORC1  | DB00946 | Phenprocoumon | B | 1  | AA04 |
| Known Interactor | 79001 | VKORC1  | DB01418 | Acenocoumarol | B | 1  | AA07 |
| Novel Interactor | 833   | CARS    | DB04443 | L-Cysteine    | R | 5  | CB01 |
| Novel Interactor | 833   | CARS    | DB04443 | L-Cysteine    | S | 1  | XA08 |
| Novel Interactor | 833   | CARS    | DB04443 | L-Cysteine    | V | 3  | AB23 |
| Novel Interactor | 834   | CASP1   | DB01017 | Minocycline   | A | 1  | AB23 |
| Novel Interactor | 834   | CASP1   | DB01017 | Minocycline   | J | 1  | AA08 |
| Novel Interactor | 916   | CD3E    | DB00075 | Muromonab     | L | 4  | AA02 |
| Novel Interactor | 917   | CD3G    | DB00075 | Muromonab     | L | 4  | AA02 |
| Novel Interactor | 960   | CD44    | DB08818 | Hyaluronan    | D | 3  | AX05 |
| Novel Interactor | 960   | CD44    | DB08818 | Hyaluronan    | M | 9  | AX01 |
| Novel Interactor | 960   | CD44    | DB08818 | Hyaluronan    | R | 1  | AX09 |
| Novel Interactor | 960   | CD44    | DB08818 | Hyaluronan    | S | 1  | KA01 |
| Novel Interactor | 634   | CEACAM1 | DB00113 | Arcitumomab   | V | 9  | IA06 |
| Novel Interactor | 1595  | CYP51A1 | DB01007 | Tioconazole   | D | 1  | AC07 |
| Novel Interactor | 1595  | CYP51A1 | DB01007 | Tioconazole   | G | 1  | AF08 |
| Novel Interactor | 1595  | CYP51A1 | DB01167 | Itraconazole  | J | 2  | AC02 |
| Novel Interactor | 54583 | EGLN1   | DB00126 | Vitamin C     | A | 11 | GA01 |
| Novel Interactor | 54583 | EGLN1   | DB00126 | Vitamin C     | G | 1  | AD03 |
| Novel Interactor | 54583 | EGLN1   | DB00126 | Vitamin C     | S | 1  | XA15 |
| Novel Interactor | 2260  | FGFR1   | DB00039 | Palifermin    | V | 3  | AF08 |
| Novel Interactor | 2260  | FGFR1   | DB07438 | Sorafenib     | L | 1  | XE05 |
| Novel Interactor | 2260  | FGFR1   | DB08896 | Regorafenib   | L | 1  | XE21 |
| Novel Interactor | 3055  | HCK     | DB06616 | Bosutinib     | L | 1  | XE14 |
| Novel Interactor | 4758  | NEU1    | DB00198 | Oseltamivir   | J | 5  | AH02 |
| Novel Interactor | 4835  | NQO2    | DB00170 | Menadiione    | B | 2  | BA02 |



|                  |      |      |         |             |   |   |      |
|------------------|------|------|---------|-------------|---|---|------|
| Novel Interactor | 4835 | NQO2 | DB08189 | Melatonin   | N | 5 | CH01 |
| Novel Interactor | 4835 | NQO2 | DB01087 | Primaquine  | P | 1 | BA03 |
| Novel Interactor | 6240 | RRM1 | DB00242 | Cladribine  | L | 1 | BB04 |
| Novel Interactor | 6240 | RRM1 | DB00441 | Gemcitabine | L | 1 | BC05 |
| Novel Interactor | 6240 | RRM1 | DB07554 | Clofarabine | L | 1 | BB06 |
| Novel Interactor | 6240 | RRM1 | DB01005 | Hydroxyurea | L | 1 | XX05 |
| Novel Interactor | 6240 | RRM1 | DB01073 | Fludarabine | L | 1 | BB05 |
| Novel Interactor | 7172 | TPMT | DB01250 | Olsalazine  | A | 7 | EC03 |

### Significantly Connected Drugs

We ranked drugs that target the genes in the schizophrenia interactome using Fisher's exact test. We compared the number of schizophrenia interactome genes that a drug targets compared to the total number of genes that same drug targets. Fisher's test computes the significance of that overlap as a p-value, which was further filtered using Benjamini-Hochberg correction for multiple testing. We showed the significantly connected drugs in dark green color in the drug-gene interactome figure.

| P-value  | Drug                                 |
|----------|--------------------------------------|
| 0.000024 | Tamoxifen                            |
| 0.000828 | Acetylsalicylic acid                 |
| 0.004422 | Phenobarbital                        |
| 0.008544 | Atomoxetine                          |
| 0.008544 | Estramustine                         |
| 0.008544 | Resveratrol                          |
| 0.010423 | Arsenic trioxide                     |
| 0.020037 | Flunarizine                          |
| 0.020037 | Remoxipride                          |
| 0.020037 | Secobarbital                         |
| 0.020037 | Staurosporine                        |
| 0.020037 | Sulindac                             |
| 0.02949  | Milnacipran                          |
| 0.031159 | Dehydroepiandrosterone               |
| 0.033901 | ABT-263                              |
| 0.033901 | Alsterpauellone                      |
| 0.033901 | Butriptyline                         |
| 0.033901 | Flavopiridol                         |
| 0.033901 | Mesalazine                           |
| 0.033901 | Pentobarbital                        |
| 0.033901 | Phenylbutazone                       |
| 0.033901 | Vitamin E                            |
| 0.044906 | Dopamine                             |
| 0.044906 | Gavestinel                           |
| 0.044906 | Ibuprofen                            |
| 0.044906 | Iloperidone                          |
| 0.044906 | "Inositol 1,3,4,5-Tetrakisphosphate" |
| 0.044906 | Melatonin                            |
| 0.044906 | Memantine                            |
| 0.044906 | Mibefradil                           |
| 0.044906 | Minocycline                          |
| 0.044906 | Orphenadrine                         |
| 0.044906 | Pseudoephedrine                      |
