# Supplementary material for: Schizophrenia interactome with 504 novel protein–protein interactions
Source: NPJ Schizophr. 2016 Apr 27;2:16012–. doi: 10.1038/npjschz.2016.12 (PMC4898894; doi:10.1038/npjschz.2016.12)
Supplement: Supplementary File 3 [file npjschz201612-s3.pdf]

**A. IP: STT3A**

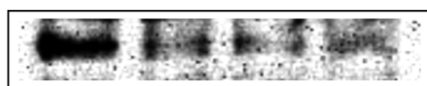

blot: MCAM

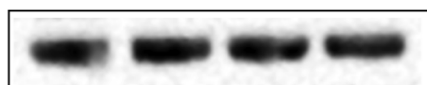

blot: STT3A

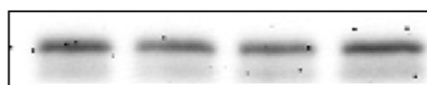

blot: SCP 3

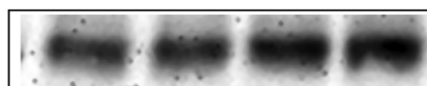

blot: RPS25

┌────────┐ ┌────────┐  
Liver    Pancreas

**B. IP: RPS25**

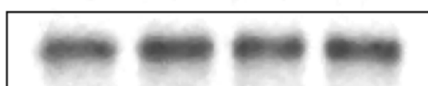

blot: STT3A

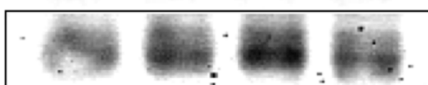

blot: RPS25

┌────────┐ ┌────────┐  
Liver    Pancreas

**C. IP: MCAM**

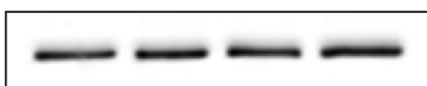

blot: MCAM

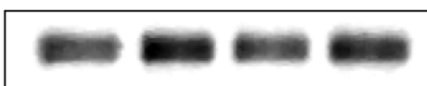

blot: STT3A

┌────────┐ ┌────────┐  
Liver    Pancreas

**D. IP: SCP3**

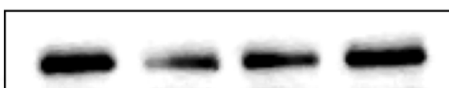

blot: STT3A

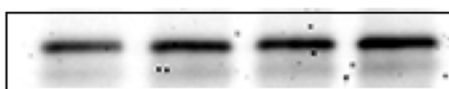

blot: SCP3

┌────────┐ ┌────────┐  
Liver    Pancreas

**E. IP: HMGB1**

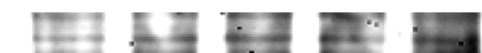

KLOTHO

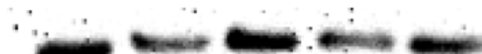

FLT-1

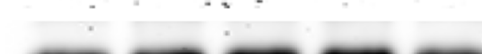

HMGB1

┌──────────────────┐ ┌──┐  
mouse lung          HPAEC

**F. IP: Klotho**

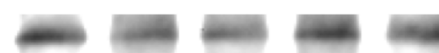

Klotho

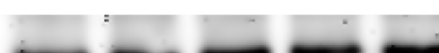

HMGB1

┌──────────────────┐ ┌──┐  
mouse lung          HPAEC

**G. IP: FLT1**

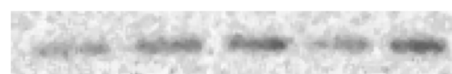

FLT-1

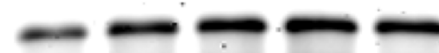

HMGB1

┌──────────────────┐ ┌──┐  
mouse lung          HPAEC
